# Supplementary material for: BREAst Cancer Personalised NuTrition (BREACPNT): dietary intervention in breast cancer survivors treated with endocrine therapy – a protocol for a randomised clinical trial
Source: PubMed Central journal article supplement — BMJ Open. 2022 Nov 21;12(11):e062498. doi: 10.1136/bmjopen-2022-062498 (PMC9680181; doi:10.1136/bmjopen-2022-062498), 2022-11-21
Supplement: bmjopen-2022-062498.draft_revisions.pdf [file bmjopen-2022-062498.draft_revisions.pdf]

# BMJ Open

BMJ Open is committed to open peer review. As part of this commitment we make the peer review history of every article we publish publicly available.

When an article is published we post the peer reviewers' comments and the authors' responses online. We also post the versions of the paper that were used during peer review. These are the versions that the peer review comments apply to.

The versions of the paper that follow are the versions that were submitted during the peer review process. They are not the versions of record or the final published versions. They should not be cited or distributed as the published version of this manuscript.

BMJ Open is an open access journal and the full, final, typeset and author-corrected version of record of the manuscript is available on our site with no access controls, subscription charges or pay-per-view fees (<http://bmjopen.bmj.com>).

If you have any questions on BMJ Open's open peer review process please email [info.bmjopen@bmj.com](mailto:info.bmjopen@bmj.com)

# BMJ Open

## **BREast Cancer Personalized NuTrition (BREACPNT) - dietary intervention in breast cancer survivors treated with endocrine therapy: Rational and study design**

|                               |                                                                                                                                                                                                                                                                                                                                                                                                                                                                                                                                                                                                                                                                                                                                                                                                                                                                                                                                                                                                                                                                                                                                                                                                                                                                                                                                                                                                                                            |
|-------------------------------|--------------------------------------------------------------------------------------------------------------------------------------------------------------------------------------------------------------------------------------------------------------------------------------------------------------------------------------------------------------------------------------------------------------------------------------------------------------------------------------------------------------------------------------------------------------------------------------------------------------------------------------------------------------------------------------------------------------------------------------------------------------------------------------------------------------------------------------------------------------------------------------------------------------------------------------------------------------------------------------------------------------------------------------------------------------------------------------------------------------------------------------------------------------------------------------------------------------------------------------------------------------------------------------------------------------------------------------------------------------------------------------------------------------------------------------------|
| Journal:                      | <i>BMJ Open</i>                                                                                                                                                                                                                                                                                                                                                                                                                                                                                                                                                                                                                                                                                                                                                                                                                                                                                                                                                                                                                                                                                                                                                                                                                                                                                                                                                                                                                            |
| Manuscript ID                 | bmjopen-2022-062498                                                                                                                                                                                                                                                                                                                                                                                                                                                                                                                                                                                                                                                                                                                                                                                                                                                                                                                                                                                                                                                                                                                                                                                                                                                                                                                                                                                                                        |
| Article Type:                 | Protocol                                                                                                                                                                                                                                                                                                                                                                                                                                                                                                                                                                                                                                                                                                                                                                                                                                                                                                                                                                                                                                                                                                                                                                                                                                                                                                                                                                                                                                   |
| Date Submitted by the Author: | 11-Mar-2022                                                                                                                                                                                                                                                                                                                                                                                                                                                                                                                                                                                                                                                                                                                                                                                                                                                                                                                                                                                                                                                                                                                                                                                                                                                                                                                                                                                                                                |
| Complete List of Authors:     | Rein, Michal; Weizmann Institute of Science, Department of Computer Science and Applied Mathematics; Weizmann Institute of Science, Department of Molecular Cell Biology<br>Dadiani, Maya; Sheba Medical Center, Cancer Research Center<br>Godneva, Anastasia; Weizmann Institute of Science, Department of Computer Science and Applied Mathematics; Weizmann Institute of Science, Department of Molecular Cell Biology<br>Bakalenik-Gavry, Michal; Sheba Medical Center, Cancer Research Center<br>Morzaev-Sulzbach, Dana; Sheba Medical Center, Cancer Research Center<br>Vachnish, Yaeli; Sheba Medical Center, Cancer Research Center<br>Kolobkov, Dmitry; Weizmann Institute of Science, Department of Computer Science and Applied Mathematics; Weizmann Institute of Science, Department of Molecular Cell Biology<br>Lotan-Pompan, maya; Weizmann Institute of Science, Department of Computer Science and Applied Mathematics; Weizmann Institute of Science, Department of Molecular Cell Biology<br>Weinberger, Adina; Weizmann Institute of Science, Department of Computer Science and Applied Mathematics; Weizmann Institute of Science, Department of Molecular Cell Biology<br>Segal, Eran; Weizmann Institute of Science, Department of Computer Science and Applied Mathematics; Weizmann Institute of Science, Department of Molecular Cell Biology<br>Gal-Yam, Einav Nili; Sheba Medical Center, Oncology Institute |
| Keywords:                     | NUTRITION & DIETETICS, Breast tumours < ONCOLOGY, Microbiology < NATURAL SCIENCE DISCIPLINES                                                                                                                                                                                                                                                                                                                                                                                                                                                                                                                                                                                                                                                                                                                                                                                                                                                                                                                                                                                                                                                                                                                                                                                                                                                                                                                                               |

SCHOLARONE™  
Manuscripts

1  
2  
3  
4  
5 **BREast Cancer Personalized NuTrition (BREACPNT) - dietary intervention in breast**  
6 **cancer survivors treated with endocrine therapy: Rational and study design**  
7  
8  
9

10 Michal Rein<sup>3,4</sup>, Maya Dadiani<sup>1</sup>, Anastasia Godneva<sup>3,4</sup>, Michal Bakalenik-Gavry<sup>1</sup>, Dana  
11 Morzaev-Sulzbach<sup>1</sup>, Yaeli Vachnish<sup>1</sup>, Dmitry Kolobkov<sup>3,4</sup>, Maya Lotan-Pompan<sup>3,4</sup>,  
12 Adina Weinberger<sup>3,4</sup>, Eran Segal<sup>3,4</sup> and Einav Nili Gal-Yam<sup>2</sup>  
13  
14  
15

16  
17 <sup>1</sup>Sheba Medical Center, Cancer Research Center, Tel-Hashomer, Ramat Gan, 5262100, Israel

18 <sup>2</sup>Sheba Medical Center, Oncology Institute, Tel-Hashomer, Ramat Gan, 5262100, Israel

19 <sup>3</sup>Department of Computer Science and Applied Mathematics, Weizmann Institute of Science, Rehovot 7610001, Israel

20 <sup>4</sup>Department of Molecular Cell Biology, Weizmann Institute of Science, Rehovot 7610001, Israel  
21

22 **Corresponding authors**

23  
24 Correspondence to Dr Einav Nili Gal-Yam<sup>2</sup>, [Einav.NiliGalYam@sheba.health.gov.il](mailto:Einav.NiliGalYam@sheba.health.gov.il) Prof. Eran Segal<sup>3,4</sup>, [eran.segal@weizmann.ac.il](mailto:eran.segal@weizmann.ac.il)  
25

26 <sup>2</sup>Sheba Medical Center, Oncology Institute, Tel-Hashomer, Ramat Gan, 5262100, Israel

27 <sup>3</sup>Department of Computer Science and Applied Mathematics, Weizmann Institute of Science, Rehovot 7610001, Israel

28 <sup>4</sup>Department of Molecular Cell Biology, Weizmann Institute of Science, Rehovot 7610001, Israel  
29  
30  
31  
32  
33  
34  
35  
36  
37  
38  
39  
40  
41  
42  
43  
44  
45  
46  
47  
48  
49  
50  
51  
52  
53  
54  
55  
56  
57  
58  
59  
60

Word count: 3770

## ABSTRACT

**Introduction:** Breast cancer survivors treated with adjuvant endocrine therapy commonly experience weight gain, which has been associated with low adherence to therapy and worse breast cancer prognosis. We aim to assess whether a personalized postprandial glucose targeting diet will be beneficial for weight management as compared to the recommended Mediterranean diet in this patient population

**Methods and Analysis:** The BREAst Cancer Personalized NuTrition (BREACPNT) study is a phase-2 randomized trial in Hormone Receptor positive (HR+) breast cancer patients, treated with adjuvant endocrine therapy. The study objective is to assess whether dietary intervention intended to improve postprandial glycaemic response to meals results in better weight and glycaemic control in this population as compared to the standard recommended Mediterranean diet. Consenting participants will be assigned in a single blinded fashion to either of two dietary arms (Mediterranean diet or an algorithm-based personalized diet). They will be asked to provide a stool sample for microbiome analysis and will undergo continuous glucose monitoring for two weeks, at the initiation and termination of the intervention period. Microbiome composition data will be used to tailor personal dietary recommendations. After randomization and provision of dietary recommendations, participants will be asked to continuously log their diet and lifestyle activities on a designated smartphone application during the 6-month intervention period, during which they will be monthly monitored by a certified dietitian. Participants' clinical records will be followed twice yearly for five years for treatment adherence, disease free survival and recurrence.

**Ethics and dissemination:** The study has been approved by the ethics committee in the Sheba medical center (file 5725-18-SMC, Ramat Gan, Israel) and the Weizmann Institutional Review Board (file 693-2, Rehovot, Israel). The finding of the study will be published in a peer reviewed publication.

ClinicalTrials.gov Identifier: NCT04079270

MOH Identifier: 2019-03-28\_006056

### Strengths and limitations of this study

- A trial testing the efficacy of Personalized Postprandial-glucose-response Targeting (PPT) diet, based on an innovative dietary approach for weight maintenance, as compared to standard diet, in breast cancer survivors.
- The personalized diet involves advanced technologies, including microbiome, continuous glucose monitoring, metabolomics features and full dietary records are used to allow better understanding of the interactions between dietary intake with metabolic and health parameters.
- A homogenous study population, that includes HR+, early stage breast cancer survivors treated with adjuvant endocrine therapy. Patients are randomized into the two study arms and stratified by stage, treatment type, menopausal status and BMI. Yet, the study patients are representative of women from the center of Israel.
- The study design includes daily use of smartphone application for logging dietary intake and lifestyle events. While this may improve patient' adherence to diet, it can lead to exclusion of patients who do not hold a smartphone or with no capability to work with a smartphone app on a daily basis.

### INTRODUCTION

The majority (~75%) of breast cancer patients are diagnosed with hormone receptor-positive (HR+) tumors and are assigned adjuvant endocrine treatment (ET) for a period of at least 5 years, which was shown to improve survival. However, adjuvant ET is associated with distressing side-effects which may be long lasting and substantially impair patients' quality of life and adherence to treatment. These side effects include weight gain and body composition changes, which are common in breast cancer survivors and are experienced by many women during treatment and for years after diagnosis(1–3). Weight gain in this population is complex and is

1  
2  
3 associated with various factors such as tumor type, menopausal status(4), pre-  
4 diagnosis body mass index (BMI)(5) and neo-adjuvant/adjuvant treatment type  
5 including chemotherapy and ET(2,6). Importantly, weight gain after breast cancer  
6 diagnosis is associated with increased risk for metabolic syndrome and cardiac disease  
7 (7,8), and was reported as a risk factor for breast cancer recurrence and shorter  
8 survival(4,9,10). Therefore, weight management strategies including diet, regular  
9 physical activity and cognitive behavioral therapy are recommended for controlling  
10 weight gain in breast cancer patients. Previous studies showed that weight loss  
11 interventions, incorporating diet, exercise and psychosocial support, in overweight or  
12 obese breast cancer survivors appear to result in decreased body weight, BMI and  
13 waist circumference and improvement in overall quality of life(11). However, the  
14 optimal weight loss intervention method and the impact of weight loss on survival  
15 outcomes is unclear. Furthermore, the interaction between the microbiome of breast  
16 cancer patients and dietary intervention has not been assessed.

17  
18  
19  
20  
21  
22  
23  
24  
25  
26  
27  
28  
29  
30  
31  
32  
33  
34  
35  
36  
37  
38  
39  
40  
41  
42  
43  
44  
45  
46  
47  
48  
49  
50  
51  
52  
53  
54  
55  
56  
57  
58  
59  
60  
The comprehensive role of the gut microbiome in modulating immune and  
metabolic health is increasingly recognized. Dysbiosis, referring to the disruption in  
the balance of gut bacterial communities, is associated with many conditions(12). The  
gut microbiome homeostasis can be influenced by internal factors, such as genetic,  
age-related and hormonal-related, as well as by external factors, such as stress,  
lifestyle and antibiotics(13). In addition, the microbiome is directly affected by the  
individual diet which in turn affects the body's response to food (14,15). Particularly  
relevant to breast cancer, diet plays an important role in creating a microbiome  
environment involved in estrogen metabolism(16). High estrogen levels contribute to  
breast cancer risk in postmenopausal women(17). In a recent study, gut microbiome  
diversity was linked to weight gain(18) and microbiome alterations were found to  
contribute to post-dieting weight regain(19). In addition, it was found that the  
increase in breast cancer risk with increasing BMI among postmenopausal women is  
associated with an increase in estrogens, particularly bioavailable estradiol (20). In a  
previous study we showed in an unprecedented scale of 800 people that individuals  
vary greatly in their glycemc response to the same food(21). Importantly, this study  
emphasized the involvement of functional microbial pathways and bacterial taxa in

1  
2  
3 host glucose metabolism. This unique dataset yielded an algorithm capable of  
4 accurately predicting personalized postprandial glycemic response (PPGR) to arbitrary  
5 meals. The algorithm's predictions are based on personal measurements, including  
6 blood tests, personal lifestyle and gut bacteria profiles. In a following study  
7 implementing a 6-month dietary intervention plan in individuals with prediabetes, the  
8 Personalized Postprandial-glucose-response Targeting (PPT) approach significantly  
9 improved glycemic control and reduced PPGRs as compared to the commonly  
10 recommended Mediterranean diet (22).  
11  
12  
13  
14  
15  
16  
17

18 In this study we seek to evaluate the clinical efficacy of the PPT diet combined  
19 with caloric restriction, compared to the Mediterranean diet, in promoting weight  
20 maintenance or weight loss and glycemic control in HR+ early stage breast cancer  
21 survivors treated with adjuvant ET.  
22  
23  
24  
25

## 26 **METHODS**

### 27 **Study design**

28  
29  
30  
31  
32 This study is a two-arm, parallel group, single-blinded, randomized controlled trial in  
33 early stage HR+ breast cancer patients treated with adjuvant endocrine therapy.  
34 Eligible participants will undergo a 6-month nutrition intervention program which will  
35 include dietary recommendations, daily logging and monthly follow up meetings  
36 provided by a certified dietician. Upon trial entry and after profiling (described below)  
37 participants will be randomly and equally assigned to the Personalized Postprandial-  
38 glucose-response Targeting (PPT) dietary (arm A) or to the Mediterranean-style (MED)  
39 dietary (arm B) (as shown in **Figure 1**). All meetings will take place in the Breast  
40 Oncology Institute at the Sheba Medical Center. The primary objective of the study is  
41 to evaluate the efficacy of the PPT arm vs the MED arm in controlling body mass  
42 changes in the patient population during the intervention period (study endpoints are  
43 detailed in **BOX 1**)  
44  
45  
46  
47  
48  
49  
50  
51  
52  
53  
54  
55  
56  
57  
58  
59  
60

**BOX 1 – STUDY ENDPOINTS****Primary endpoint**

Body weight changes defined as the net body weight gained/lost in the 6-month intervention period

**Secondary endpoint**

Glycemic response as measured by continuous glucose monitoring (CGM) device

**Exploratory endpoint**

- Five years Disease free survival (DFS)
- Microbiome and blood metabolites modulation during the diet interventions
- Adherence to algorithm-based personalized diets, compared to standard diets advised for weight control
- HR+ breast cancer patients' adherence to hormonal treatment
- Translational studies

**Patient and public involvement**

Patients are being involved in the recruitment effort by actively publishing the study recruitment information and sharing their own experience during the study, via social networks and breast cancer survivors' groups. At the end of the study patients will receive an analysis of their glucose responses to the foods that they ate, and get an access to different nutritional tools that will be available to them on a secure website or on a dedicated mobile application. Furthermore, At the end of the study all patients will be given an access to their personal tailored dietary recommendations, built for them by the study team based on their personal data, regardless of their assigned arm during the study.



## Study population

This trial will enroll breast cancer survivors treated with ET and followed at the Breast Oncology Institute at the Sheba Medical Center. Eligibility criteria (inclusion and exclusion criteria) are detailed in **Table 1**. Potentially eligible participants will be identified and recruited to the study by the medical team during regular clinic visits or via database search and phone calls by the clinical study coordinator (SC). Information leaflets and a poster describing the study design and contact information will be available at the institute's reception and waiting area. Additionally, a video explaining the study and its aims will be shown on screens at the institute's reception and waiting area and will be sent to potential participants (<https://youtu.be/kxrqONj3KGM>). All participants will assign informed consent.

**Table 1: Eligibility criteria**

| Inclusion Criteria                                                                                                                                              | Exclusion Criteria                                                                                   |
|-----------------------------------------------------------------------------------------------------------------------------------------------------------------|------------------------------------------------------------------------------------------------------|
| Female patients                                                                                                                                                 | Oral Antibiotics/antifungal use in the previous one month to profiling stage *                       |
| Age $\geq 18$ and $\leq 80$                                                                                                                                     | Known Diagnosis of diabetes or the use of anti-diabetic and/or weight-loss medication                |
| Diagnosis of stage 1-3 HR+ breast cancer, who underwent surgery                                                                                                 | BMI<18.5                                                                                             |
| At least 60 days after last non-endocrine oncology treatments (i.e. definitive surgery, radiation or chemotherapy – whichever is last) if these were indicated. | Patients under another diet regime and/or a dietitian consultation/ clinical study                   |
| Adjuvant endocrine therapy (either Tamoxifen or Aromatase inhibitor +/- GNRH agonists) taken for at least 30 days but no more than 24 months.                   | Pregnancy, breast feeding                                                                            |
| Willing to operate a smartphone application                                                                                                                     | HIV carriers, Cushing syndrome, Chronic Kidney Disease, acromegaly, hyperthyroidism, liver cirrhosis |
|                                                                                                                                                                 | Known diagnosis of psychiatric disorders (Schizophrenia, Bipolar Disorder)                           |
|                                                                                                                                                                 | Known diagnosis of IBD (inflammatory bowel diseases)                                                 |
|                                                                                                                                                                 | Patients that underwent Bariatric surgery                                                            |
|                                                                                                                                                                 | Known Alcohol or substance abuse                                                                     |

\*Patients will be offered to join the study at a later point

## Study Procedures and Intervention

### Screening and profiling stage

Consenting patients will proceed to the screening and profiling stage. During this stage they will undergo the following procedures:

1. Meeting with the SC and completion of questionnaires detailing relevant medical background, nutritional habits and lifestyle activities. Questionnaires will be filled online using the REDCap (23) software (a secure web application for managing online surveys and clinical trials).
2. Participants will provide blood samples after a night fast (12 hours) for CBC and blood chemistry, including liver function, lipid profiling, Fasting Plasma Glucose (FPG) and HbA1c. LH, FSH and Estradiol will be measured only in pre-menopausal patients. Participants will provide urine sample for estradiol derivatives for future exploratory analyses.
3. Anthropometrics measurements, including weight, height, waist and hip circumference will be taken at this meeting.
4. Stool sample: Patients will receive a designated stool kit (Genotek OMR200) to collect stool at home. The SC will instruct them how to provide the stool samples and will ask to return this kit during the following week for further processing of the microbiome data. Microbiome sequenced data are essential for the algorithm predictions, thus stool sample is obligatory for participation in the study.
5. Continuous glucose monitoring (CGM) connection: Patients will be connected to a CGM (Abbott Freestyle LibrePro) for 2 weeks. The CGM kit includes a sensor affixed to the back of the arm that continuously monitors glucose levels in the interstitial fluid, translates and records blood glucose levels.
6. Food diary: Patients will be instructed to download the study dedicated smartphone application ('personalized nutrition project') for food logging. They will log in real-time their food intake, physical activities, sleep duration and quality and special events. During the profiling period, patients will be asked to follow their regular dietary and lifestyle habits (see examples of

1  
2  
3 logging activities in **Figure 2A**). All participants will receive a registration code  
4 and their data will be anonymized.  
5  
6

- 7 7. Data collected during the profiling period, including microbiome,  
8 anthropometrics, blood parameters and questionnaires will be analyzed and  
9 used by the PPT algorithm to provide personal dietary recommendations for  
10 each participant.  
11  
12  
13  
14

### 15 **Menus construction**

16  
17 Before randomization, menus will be constructed for each patient and will be adjusted  
18 for, patients' caloric target and clinical data. The menus construction flow is presented  
19 in **Figure 2B**.  
20  
21  
22

### 23 **Meal bank (list)**

24  
25 The menus provided to patients in this study are constructed from a meal bank that  
26 we previously generated(22), with over 2,000 meals representative of the Israeli  
27 typical diet and with a variety of different food combinations. We divided the meals  
28 in the meal bank into four meal types (breakfast, lunch, dinner and snacks) and labeled  
29 them according to meal categories (dairy; meat; fish etc.) in order to generate menus  
30 according to patients' personal preferences.  
31  
32  
33  
34  
35  
36  
37  
38

### 39 **Caloric target calculation**

40  
41 In order to provide the patients with diets that support their energetic needs and meet  
42 the recommendations for weight loss in people with overweight or obesity, the daily  
43 caloric target for each patient (in both arms) will be calculated as an average between:  
44  
45  
46  
47

- 48  
49 1. Estimated Energy Requirements (EER) calculated with the use of the Mifflin  
50 equation for Resting Energy Expenditure (REE), using their weight, height, age  
51 and gender, and multiplied by Physical Activity (PA) factor, based on the level  
52 of PA that the person performs on a regular basis (24).  
53  
54  
55  
56  
57  
58  
59  
60

- 2.
  - 3.
  - 4.
  - 5.
  - 6.
  - 7.
  - 8.
  - 9.
  - 10.
  - 11.
  - 12.
  - 13.
  - 14.
  - 15.
  - 16.
  - 17.
  - 18.
  - 19.
  - 20.
  - 21.
  - 22.
  - 23.
  - 24.
  - 25.
  - 26.
  - 27.
  - 28.
  - 29.
  - 30.
  - 31.
  - 32.
  - 33.
  - 34.
  - 35.
  - 36.
  - 37.
  - 38.
  - 39.
  - 40.
  - 41.
  - 42.
  - 43.
  - 44.
  - 45.
  - 46.
  - 47.
  - 48.
  - 49.
  - 50.
  - 51.
  - 52.
  - 53.
  - 54.
  - 55.
  - 56.
  - 57.
  - 58.
  - 59.
  - 60.
2. Energy expenditure assessed by Basal Metabolic Rate (BMR) value measured by body composition analyzer (Tanita). The result from this equation will be divided by 0.7 (as REE represents ~70% of total energy expenditure).
3. Average daily caloric intake obtained from the patients' dietary records during the profiling stage, to account for the subject's dietary habits prior to the intervention.

Furthermore, for individuals with BMI>25 a total of 500Kcal will be reduced from their calculated caloric target, but not less than 1200 calories/day, to allow weight loss according to common recommendations for weight loss (25,26).

## Diets

### *Mediterranean-style (MED) diet*

In this arm we included meals that were scored by four external dietitians according to the Mediterranean-style dietary recommendations. Meals were binary scored as recommended (=1) or not recommended (=0) and we applied scores 1 to 5 to all meals, depending on how many dietitians marked the meal as recommended or not. The diet is based on recommended foods such as vegetables, fruits, legumes, whole grain products, unsaturated fats such as olive oil and nuts, fish, poultry and low-fat dairy products. Consumption of red meat, high fat dairy products, processed foods and sweet pastries, was discouraged as part of the diet. Additionally, menus in this arm were designed with the following target for daily macronutrient composition: 45-65% of calories from carbohydrates; 15-20% from protein; and 20-35% from fat, with up to 10% from saturated fat. Menus include only meals that received scores 1 and 2. Participants will be encouraged to consult with the dietitian regarding meals that may not appear in the constructed menu.

### *Personalized Postprandial-glucose-response Targeting (PPT) diet*

In this arm, dietary recommendations will be based on the algorithm predictions of the postprandial glucose responses (20), shown to improve glycemic control and metabolic health in healthy individuals or in individuals with prediabetes and

1  
2  
3 diabetes(22,27). Notably, these interventions were not caloric restricted as in the  
4 current study. Meals will be scored from 1-5 based on a unique scoring method that  
5 we developed and based on their predicted response, taking into consideration a list  
6 of features including questionnaires data, anthropometrics, blood parameters and  
7 microbiome abundances (see **Supplementary table 1** for the full list). The algorithm is  
8 trained using PPGRs collected via CGM devices from previous and ongoing studies,  
9 and it is able to generate predictions without the patient's personal CGM-based  
10 features, already done in a pilot study within individuals diagnosed with Type-2  
11 Diabetes (27).  
12  
13  
14  
15  
16  
17  
18  
19

### 20 21 **Randomization**

22  
23 Following the profiling stage patients will be randomly assigned to one of two arms of  
24 the study. Approximately 100 subjects will be assigned to each arm using a blinded  
25 randomization algorithm and the following stratification factors: (1) menopausal  
26 status at study entry (post/pre) (2) received/not received chemotherapy prior to study  
27 entry (3) ET type (Tamoxifen/Aromatase inhibitor) (4) Breast Cancer stage at diagnosis  
28 and (5) BMI above/below 27. Patients and study team, excluding the dietitian, will be  
29 blinded to the study arm assigned.  
30  
31  
32  
33  
34  
35  
36

### 37 **Recommendation meeting**

38  
39 Upon menus construction, patients from both arms will be invited to a  
40 recommendations meeting (hereafter 'day-0') with the dietitians. Patients will receive  
41 general information regarding their menu and will be instructed to consume and log  
42 their meals according to it. In order to ensure accurate logging the dietitians will  
43 schedule an online follow up two weeks after 'day-0'. Anthropometrics  
44 measurements, including weight, hip and waist circumference, taken at this meeting  
45 will be used as baseline measurements.  
46  
47  
48  
49  
50  
51  
52  
53

### 54 **Follow up Meetings**

55  
56 All patients will participate in monthly follow-up meetings with a dietitian (total of 6  
57 meetings) in order to evaluate their compliance to the dietary recommendations they  
58  
59  
60

1  
2  
3 received and provide additional advice if needed. Anthropometric measurements  
4 (weight, hip and waist circumference) will be taken at each time point. Furthermore,  
5 patients will be asked to fill a follow-up questionnaire and report any changes within  
6 their lifestyle and treatment. At the beginning of Month 4 of the intervention period,  
7 patients will be offered to be reconnected to CGM for two weeks (optional). At the  
8 monthly meeting before the end of intervention patients will receive a stool kit, to be  
9 returned at the end of intervention meeting.  
10  
11  
12  
13  
14  
15

### 16 17 **End of intervention**

18  
19  
20 At the end of the 6-month intervention period, patients will be invited to a meeting in  
21 which anthropometrics measurement will be taken, as well as urine, blood and stool  
22 samples. Additionally, participants will be connected to CGM for 2 weeks (mandatory)  
23 for the third time (Figure 1). When patients return CGM they will be unblinded to their  
24 assigned intervention arm by the study dietitian.  
25  
26  
27  
28  
29

### 30 31 **Long term follow up**

32  
33 At 12-month time point, patients will be invited to a follow up meeting and will be  
34 asked to fill follow-up questionnaires, including food frequency questionnaire.  
35 Anthropometric measurements and a 3-day food diary on the study app will be  
36 recorded. Patients will receive the menu of the other study arm and will be offered to  
37 follow either one of the diets. Long-term clinical follow-up information will be  
38 collected from the electronic medical records twice yearly for treatment adherence,  
39 recurrence and survival calculation purposes, for a period of up to five years post  
40 randomization.  
41  
42  
43  
44  
45  
46  
47

### 48 49 **Adherence to the study recommendations**

50  
51 The adherence to the prescribed diets during the intervention will be evaluated by the  
52 dietitian by a close monitoring of the patients' self-recorded dietary intake in the  
53 logging application, as well as by monthly electronic follow-up questionnaires that  
54 participants will be asked to fill out. In order to encourage dietary adherence and self-  
55 monitoring, we will generate a bi-weekly semi-automatic feedback reports that will  
56  
57  
58  
59  
60

1  
2  
3 include composite grades on a scale of 0-100 (from worse to best) for diet  
4 composition, calorie intake and dietary fiber intake separately, for the entire two-  
5 week period (**Figure 2C**).  
6  
7  
8  
9

- 10 • *MED-diet composition grade*: indicates how well the participant sticks to the  
11 dietary recommendations based on the MED approach including Carbohydrate  
12 (as % of daily caloric intake), fats in general (as % of daily caloric intake) and  
13 specifically saturated fat intake below and above 10% of caloric intake. Dietary  
14 fiber intake per each of 1000 kCal per day will be also calculated as part of the  
15 score.  
16
- 17 • *PPT-diet composition grade*: indicates how well the participant sticks to  
18 predictor-based meal scores. Each meal score was assigned with a grade as  
19 follows: meal score 1=grade 100; meal score 2=80; meal score 3=50; meal  
20 score 4=25; meal score 5=0. The grades are averaged calorie-wise (with food  
21 energy trimmed to be within (100,500) kcal interval)-  $\sum \text{kcal}(i) \cdot \text{grade}(i)$ . For  
22 example, if a participant eats three meals: 600 kcal of meal score 2, 1000 kcal  
23 of meal score 5 and 80 kcal of meal score 1, feedback grade would be:  
24  $(500 \cdot 80 + 500 \cdot 0 + 100 \cdot 100) / (500 + 500 + 100) = 45$ . If too few (100 by default)  
25 calories are logged (overall), we did not compute a score.  
26
- 27 • *Calories grade*: indicates how well the participant sticks to the prescribed  
28 caloric target. When caloric intake deviates within 15% of caloric target (CT)  
29 the applied grade is 100; when caloric intake deviation exceeds 60% of CT the  
30 applied grade is 0; when caloric intake deviation is between 15% to 60%, a  
31 linear penalty is applied to the grade depending on the deviation.  
32
- 33 • *Dietary fiber grade*: indicates if participants consumed the recommended  
34 amount of dietary fibers from the diet at the referred time. When fiber intake  
35 in grams per day reaches the recommended amount, or higher the applied  
36 grade is 100 and when it is below the recommended amount a linear penalty  
37 is applied to the grade.  
38  
39  
40  
41  
42  
43  
44  
45  
46  
47  
48  
49  
50  
51  
52  
53  
54  
55

56 In addition to grades, feedback reports also included a list of recommended meals and  
57 non-recommended meals (by meal score) to highlight the best and worst meals  
58 consumed on that time period (as logged by the participant). The best and worst meals  
59  
60

1  
2  
3 lists will be generated systematically and be reviewed by a dietitian from the study  
4 team.  
5  
6

## 7 8 **STATISTICAL CONSIDERATION**

### 9 10 **Sample size determination**

11  
12  
13 To estimate the required sample size, we performed power analysis while estimating  
14 effect size using the results of different studies describing controlled diet intervention  
15 aimed at weight control. Our goal is to detect a difference of at least 2 kg in net weight  
16 loss/gain (kg) between control group and experimental group. Based on the study of  
17 Shai et al. (28), the standard deviation of weight loss is 4.2 and the projected sample  
18 size with alpha of 0.05 and power of 0.8, with an estimated dropout rate of 10%, is  
19 107 people for each arm totaling 214 individuals.  
20  
21  
22  
23  
24  
25

### 26 27 **Primary, secondary and exploratory endpoint analysis**

28  
29  
30 All statistical analyses will be performed using Python 2.7. Continuous variables will  
31 be presented as mean±SD and dichotomous/categorical variables as proportions. The  
32 normality of the distribution of continuous variables will be tested by the Kolmogorov-  
33 Smirnov test. If normality will be rejected, non-parametric tests will be used. To test  
34 the association between continuous variables with normal distribution, the Pearson  
35 correlation coefficient will be performed and to test associations between continuous  
36 variables which do not distribute normally or for ordinal variables, the Spearman  
37 correlation coefficient will be used. To compare parameters for continuous variables  
38 in two time points, the paired-samples t-test will be performed (or Wilcoxon test for  
39 non-normally distributed variables), in dichotomous/categorical variables the  
40 McNemar test will be performed. To compare continuous variables in a number of  
41 time points ANOVA with repeated measures will be used. For comparison of  
42 dichotomous/categorical variables in the number of time points the Cochran's Q test  
43 will be performed. P values < 0.05 will be considered significant.  
44  
45  
46  
47  
48  
49  
50  
51  
52  
53  
54  
55  
56

### 57 58 **Data Acquisition, Storage and Analysis**

59  
60



1  
2  
3 All samples will be stored at the Breast Cancer Translational Research laboratory at  
4 Sheba Medical Center. The blood and urine samples will be stored at -80°C and  
5 bacterial DNA samples will be stored at -20°C. The samples will be encoded with no  
6 identifying information. Identifying details and codes will be kept in an encrypted file  
7 stored at Sheba medical center. Encoded stool samples will be transferred to the  
8 Weizmann Institute of science. There, samples will be processed for bacterial DNA  
9 processing. All clinical data will be coded. Data will be transferred using the REDcap  
10 server and stored on Weizmann servers behind a protected firewall and be accessible  
11 only to the study team. Samples will be stored for up to 10 years. All future use of  
12 stool and blood samples will be subjected to IRB approval.

### 22 **Ethics and dissemination**

23  
24  
25 The study has been approved by the Sheba medical center Institutional Review Board  
26 (IRB 5725-18) and the Weizmann institute of science Institutional Review Board. The  
27 findings of this study will be published in a peer reviewed publication. De-identified  
28 individual participant data and applicable supporting clinical trial documents will be  
29 available upon request for 12 months after publication.

### 35 **CURRENT STATUS**

36  
37  
38 To date (February 2022), 120 participants have been recruited, out of them 60  
39 completed the 6-month intervention period including 38 participants who completed  
40 the 12-month time point.

### 44 **DISCUSSION**

45  
46  
47 Dietary interventions are the first-line treatment for weight management within  
48 breast cancer survivors and have beneficial results. Yet, the ability to maintain these  
49 outcomes is questionable and require further research(11,29,30). In this trial, we aim  
50 to assess the effect of a PPT diet on weight maintenance as compared to  
51 Mediterranean-style diet in early stage HR+ breast cancer patients, taking ET.

52  
53  
54 Advantages of this study design include a comprehensive profiling of each participant,  
55 which allow us to better understand participants' metabolic baseline and to assess the  
56  
57  
58  
59  
60

1  
2  
3 effect of the dietary changes. Additionally, the continuous food logging by the study  
4 patients using a designated smartphone app can provide us with insights on the  
5 patients compliance to the dietary recommendations in both arms. However, this may  
6 limit the study population to individuals who are able to work with smartphone  
7 application on a daily basis. Furthermore, the study participants are being closely  
8 followed by a dietitian from the study team who monitor their food intake and meet  
9 them on a monthly basis in order to increase compliance during the first 6-months.  
10 However, on the long term, without intensive monitoring, the feasibility of the PPT  
11 diet and the ability to follow the diet recommendations should be investigated.  
12 Notably, Ben-Yacov et al. (22), reported that prediabetes individuals following PPT diet  
13 were able to maintain the results during 12-month follow up as compared to those  
14 who followed the MED diet.  
15

16  
17  
18  
19  
20  
21  
22  
23  
24  
25  
26  
27  
28  
29  
30  
31  
32  
33  
34  
35  
36  
37  
38  
39  
40  
41  
42  
43  
44  
45  
46  
47  
48  
49  
50  
51  
52  
53  
54  
55  
56  
57  
58  
59  
60  
Lastly, as gut microbiome composition and pathways were recently associated with  
weight changes and metabolic health parameters, as well as with risk for breast cancer  
diagnosis and recurrence (31), the rich dataset will allow us to further explore whether  
gut microbiome composition and pathways have a predictive role in weight  
management, metabolic health parameters and glycemic control within early stage  
HR+ breast cancer patients.

## **FUNDING**

This work is supported by Seerave foundation (grant number 713067). This funding  
source had no role in the design of this study and will not have any role during its  
execution, analyses, interpretation of the data, or decision to submit results.

## **AUTHOR CONTRIBUTIONS**

MR, MD and AW conceived the study and designed the intervention. MR and MD  
wrote the manuscript. AG is responsible for directing the computational aspects of the  
study. DK is responsible for the feedback reports and summary reports being sent to  
participants. MBG, DMS and YV coordinate participants' recruitment and  
management throughout the intervention and follow-up. AW developed the protocols  
and directed and performed the microbiome sample sequencing with the help of MLP.

1  
2  
3 ES and ENG conceived the study, designed the intervention and wrote the manuscript.  
4

5 All authors read and approved the final manuscript.  
6  
7  
8  
9

## 10 **COMPETING INTEREST STATEMENT**

11  
12 ENG reports Honoraria and Consulting fees from Pfizer, Novartis, Roche Eli-lilly  
13 AstraZeneca. ES is paid scientific consultants for DayTwo Inc. No pharmaceutical  
14 manufacturers or other companies from the industry contributed to the planning,  
15 design, or conduct of the trial. No other potential competing interest are relevant to  
16 this article were reported.  
17  
18  
19  
20  
21  
22  
23  
24  
25  
26  
27  
28  
29  
30  
31  
32  
33  
34  
35  
36  
37  
38  
39  
40  
41  
42  
43  
44  
45  
46  
47  
48  
49  
50  
51  
52  
53  
54  
55  
56  
57  
58  
59  
60

**BIBLIOGRAPHY**

1. Vance V, Mourtzakis M, McCargar L, Hanning R. Weight gain in breast cancer survivors: prevalence, pattern and health consequences. *Obes Rev*. 2011 Apr;12(4):282–294.
2. Goodwin PJ, Ennis M, Pritchard KI, McCreedy D, Koo J, Sidlofsky S, et al. Adjuvant treatment and onset of menopause predict weight gain after breast cancer diagnosis. *J Clin Oncol*. 1999 Jan;17(1):120–129.
3. Ginzac A, Thivat É, Mouret-Reynier M-A, Dubray-Longeras P, Van Praagh I, Passildas J, et al. Weight evolution during endocrine therapy for breast cancer in postmenopausal patients: effect of initial fat mass percentage and previous adjuvant treatments. *Clin Breast Cancer*. 2018 Oct;18(5):e1093–e1102.
4. Raghavendra A, Sinha AK, Valle-Goffin J, Shen Y, Tripathy D, Barcenas CH. Determinants of Weight Gain During Adjuvant Endocrine Therapy and Association of Such Weight Gain With Recurrence in Long-term Breast Cancer Survivors. *Clin Breast Cancer*. 2018;18(1):e7–e13.
5. White AJ, Nichols HB, Bradshaw PT, Sandler DP. Overall and central adiposity and breast cancer risk in the Sister Study. *Cancer*. 2015 Oct 15;121(20):3700–3708.
6. Nyrop KA, Williams GR, Muss HB, Shachar SS. Weight gain during adjuvant endocrine treatment for early-stage breast cancer: What is the evidence? *Breast Cancer Res Treat*. 2016 Jun 24;158(2):203–217.
7. Zhu Q-L, Xu W-H, Tao M-H. Biomarkers of the metabolic syndrome and breast cancer prognosis. *Cancers (Basel)*. 2010 Apr 28;2(2):721–739.
8. Franzoi MA, Agostinetti E, Perachino M, Del Mastro L, de Azambuja E, Vaz-Luis I, et al. Evidence-based approaches for the management of side-effects of adjuvant endocrine therapy in patients with breast cancer. *Lancet Oncol*. 2021 Jul;22(7):e303–e313.
9. Caan BJ, Emond JA, Natarajan L, Castillo A, Gunderson EP, Habel L, et al. Post-diagnosis weight gain and breast cancer recurrence in women with early stage breast cancer. *Breast Cancer Res Treat*. 2006 Sep;99(1):47–57.
10. Playdon MC, Bracken MB, Sanft TB, Ligibel JA, Harrigan M, Irwin ML. Weight Gain After Breast Cancer Diagnosis and All-Cause Mortality: Systematic Review and Meta-Analysis. *J Natl Cancer Inst*. 2015 Dec;107(12):dju275.
11. Shaikh H, Bradhurst P, Ma LX, Tan SYC, Egger SJ, Vardy JL. Body weight management in overweight and obese breast cancer survivors. *Cochrane Database Syst Rev*. 2020 Dec 11;12:CD012110.

- 1  
2  
3 12. Plottel CS, Blaser MJ. Microbiome and malignancy. *Cell Host Microbe*. 2011 Oct  
4 20;10(4):324–335.
- 5  
6 13. Erdman SE, Poutahidis T. Gut bacteria and cancer. *Biochim Biophys Acta*. 2015  
7 Aug;1856(1):86–90.
- 8  
9 14. Vrieze A, Holleman F, Zoetendal EG, de Vos WM, Hoekstra JBL, Nieuwdorp M.  
10 The environment within: how gut microbiota may influence metabolism and  
11 body composition. *Diabetologia*. 2010 Apr;53(4):606–613.
- 12  
13 15. Shulzhenko N, Morgun A, Hsiao W, Battle M, Yao M, Gavrilova O, et al.  
14 Crosstalk between B lymphocytes, microbiota and the intestinal epithelium  
15 governs immunity versus metabolism in the gut. *Nat Med*. 2011 Nov  
16 20;17(12):1585–1593.
- 17  
18 16. Shapira I, Sultan K, Lee A, Taioli E. Evolving concepts: how diet and the  
19 intestinal microbiome act as modulators of breast malignancy. *ISRN Oncol*.  
20 2013 Sep 25;2013:693920.
- 21  
22 17. Goedert JJ, Jones G, Hua X, Xu X, Yu G, Flores R, et al. Investigation of the  
23 association between the fecal microbiota and breast cancer in postmenopausal  
24 women: a population-based case-control pilot study. *J Natl Cancer Inst*. 2015  
25 Aug;107(8).
- 26  
27 18. Menni C, Jackson MA, Pallister T, Steves CJ, Spector TD, Valdes AM. Gut  
28 microbiome diversity and high-fibre intake are related to lower long-term  
29 weight gain. *Int J Obes*. 2017 Jul;41(7):1099–1105.
- 30  
31 19. Thaïss CA, Itav S, Rothschild D, Meijer MT, Levy M, Moresi C, et al. Persistent  
32 microbiome alterations modulate the rate of post-dieting weight regain.  
33 *Nature*. 2016 Dec 22;540(7634):544–551.
- 34  
35 20. Key TJ, Appleby PN, Reeves GK, Roddam A, Dorgan JF, Longcope C, et al. Body  
36 mass index, serum sex hormones, and breast cancer risk in postmenopausal  
37 women. *J Natl Cancer Inst*. 2003 Aug 20;95(16):1218–1226.
- 38  
39 21. Zeevi D, Korem T, Zmora N, Israeli D, Rothschild D, Weinberger A, et al.  
40 Personalized nutrition by prediction of glycemic responses. *Cell*. 2015 Nov  
41 19;163(5):1079–1094.
- 42  
43 22. Ben-Yacov O, Godneva A, Rein M, Shilo S, Kolobkov D, Koren N, et al.  
44 Personalized Postprandial Glucose Response-Targeting Diet Versus  
45 Mediterranean Diet for Glycemic Control in Prediabetes. *Diabetes Care*. 2021  
46 Sep;44(9):1980–1991.
- 47  
48 23. Harris PA, Taylor R, Minor BL, Elliott V, Fernandez M, O'Neal L, et al. The  
49 REDCap consortium: Building an international community of software platform  
50 partners. *J Biomed Inform*. 2019 Jul;95:103208.
- 51  
52  
53  
54  
55  
56  
57  
58  
59  
60

- 1
  - 2
  - 3
  - 4
  - 5
  - 6
  - 7
  - 8
  - 9
  - 10
  - 11
  - 12
  - 13
  - 14
  - 15
  - 16
  - 17
  - 18
  - 19
  - 20
  - 21
  - 22
  - 23
  - 24
  - 25
  - 26
  - 27
  - 28
  - 29
  - 30
  - 31
  - 32
  - 33
  - 34
  - 35
  - 36
  - 37
  - 38
  - 39
  - 40
  - 41
  - 42
  - 43
  - 44
  - 45
  - 46
  - 47
  - 48
  - 49
  - 50
  - 51
  - 52
  - 53
  - 54
  - 55
  - 56
  - 57
  - 58
  - 59
  - 60
24. Mifflin MD, St Jeor ST, Hill LA, Scott BJ, Daugherty SA, Koh YO. A new predictive equation for resting energy expenditure in healthy individuals. *Am J Clin Nutr.* 1990 Feb;51(2):241–247.
25. Jensen MD, Ryan DH, Apovian CM, Ard JD, Comuzzie AG, Donato KA, et al. 2013 AHA/ACC/TOS guideline for the management of overweight and obesity in adults: a report of the American College of Cardiology/American Heart Association Task Force on Practice Guidelines and The Obesity Society. *J Am Coll Cardiol.* 2014 Jul 1;63(25 Pt B):2985–3023.
26. Limon-Miro AT, Lopez-Teros V, Astiazaran-Garcia H. Dietary guidelines for breast cancer patients: A critical review. *Adv Nutr.* 2017 Jul 14;8(4):613–623.
27. Rein M, Ben-Yacov O, Godneva A, Shilo S, Zmora N, Kolobkov D, et al. Effects of personalized diets by prediction of glycemic responses on glycemic control and metabolic health in newly diagnosed T2DM: a randomized dietary intervention pilot trial. *BMC Med.* 2022 Feb 9;20(1):56.
28. Shai I, Schwarzfuchs D, Henkin Y, Shahar DR, Witkow S, Greenberg I, et al. Weight loss with a low-carbohydrate, Mediterranean, or low-fat diet. *N Engl J Med.* 2008 Jul 17;359(3):229–241.
29. Picon-Ruiz M, Morata-Tarifa C, Valle-Goffin JJ, Friedman ER, Slingerland JM. Obesity and adverse breast cancer risk and outcome: Mechanistic insights and strategies for intervention. *CA Cancer J Clin.* 2017 Sep;67(5):378–397.
30. Anbari AB, Deroche CB, Armer JM. Body mass index trends and quality of life from breast cancer diagnosis through seven years' survivorship. *World J Clin Oncol.* 2019 Dec 24;10(12):382–390.
31. Uzan-Yulzari A, Morr M, Tareef-Nabwani H, Ziv O, Magid-Neriya D, Armoni R, et al. The intestinal microbiome, weight, and metabolic changes in women treated by adjuvant chemotherapy for breast and gynecological malignancies. *BMC Med.* 2020 Oct 21;18(1):281.

1  
2  
3  
4  
5  
6  
7 **FIGURES LEGEND**  
8  
9

10  
11 **Figure 1. An illustration of the study design**  
12  
13  
14

15 **Figure 2. Study application and menus construction.** (A) The food logging application, examples of logging activities and information available on the application. (B) Menus construction flow. (C) An example of the bi-weekly feedback report that will be sent to participants.  
16  
17  
18  
19  
20  
21  
22  
23  
24  
25  
26  
27  
28  
29  
30  
31  
32  
33  
34  
35  
36  
37  
38  
39  
40  
41  
42  
43  
44  
45  
46  
47  
48  
49  
50  
51  
52  
53  
54  
55  
56  
57  
58  
59  
60

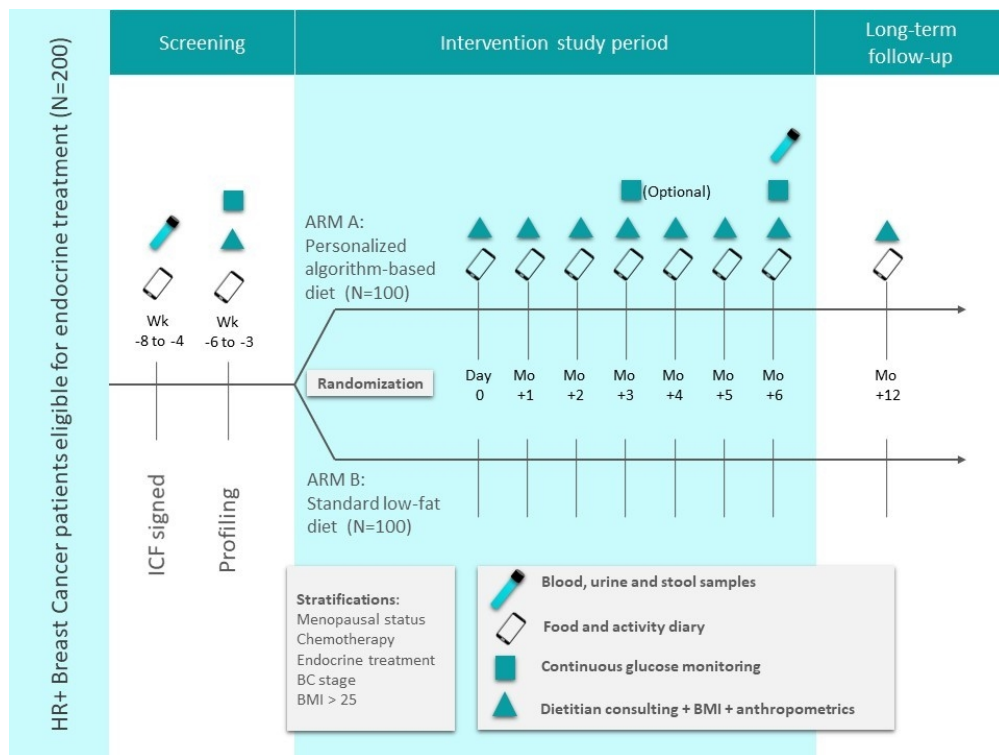

Figure 1. An illustration of the study design

254x190mm (96 x 96 DPI)



A

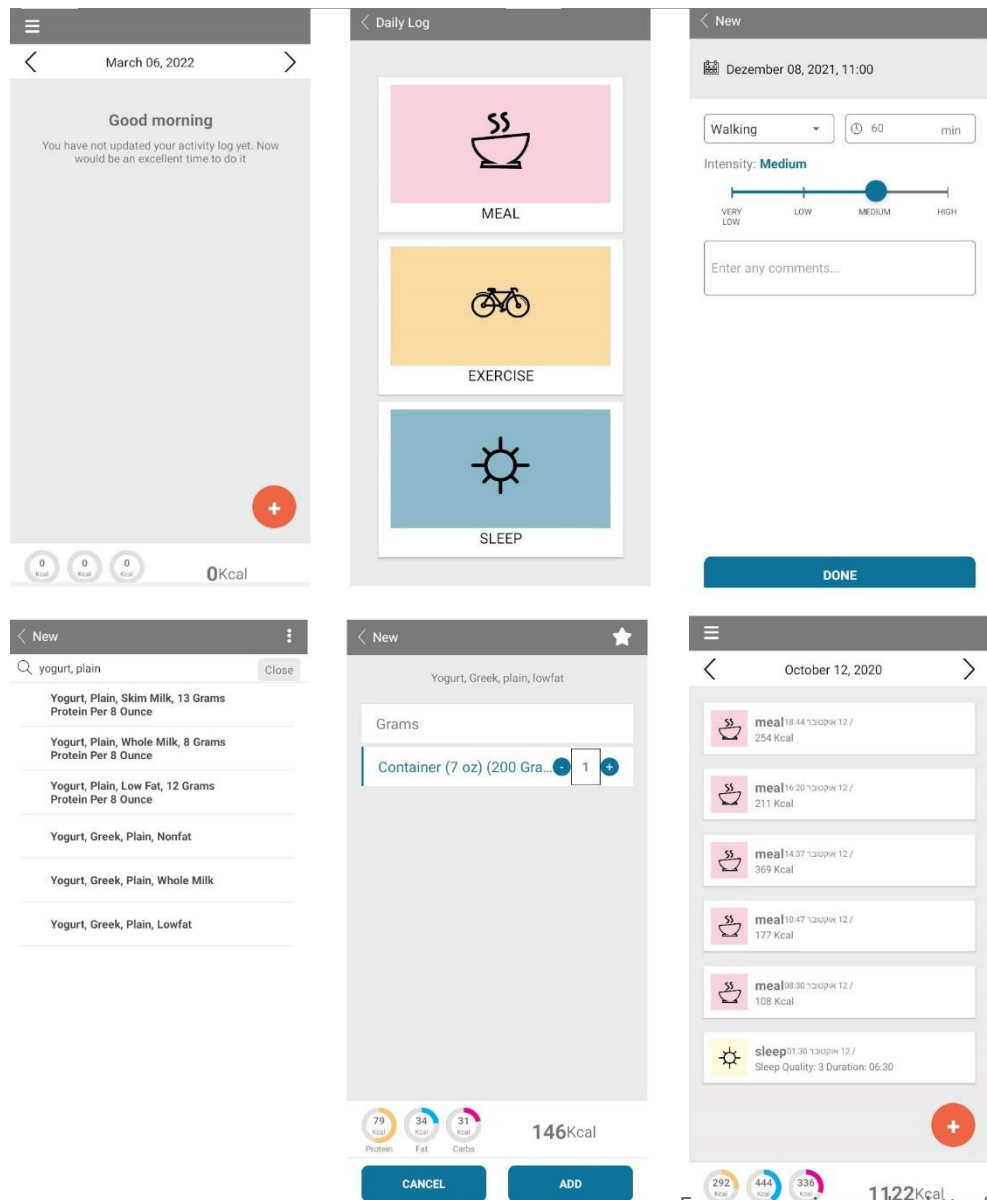

BMJ Open

B

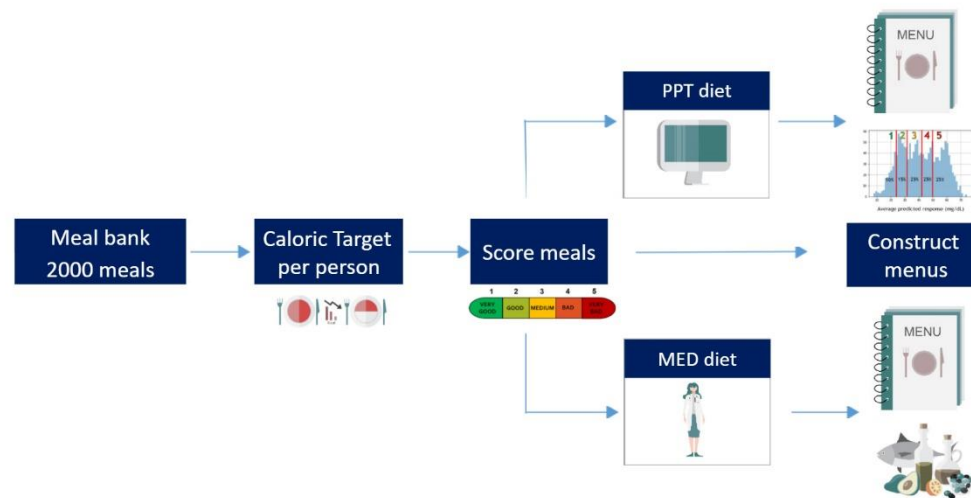

C

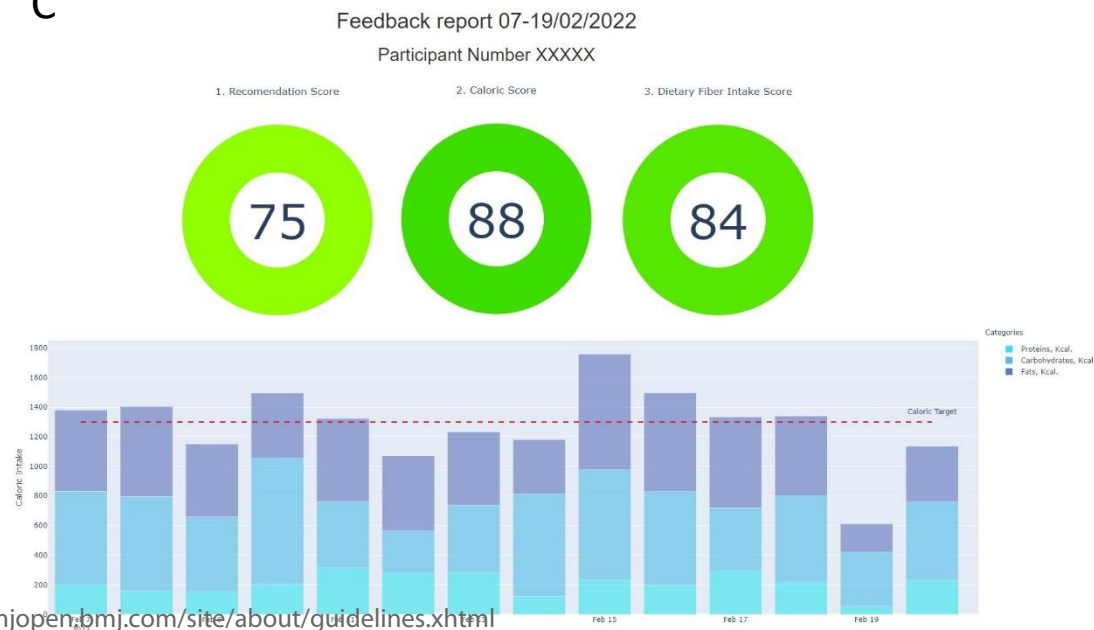

1  
2  
3  
4  
5  
6  
7  
8  
9  
10  
11  
12  
13  
14  
15  
16  
17  
18  
19  
20  
21  
22  
23  
24  
25  
26  
27  
28  
29  
30  
31  
32  
33  
34  
35  
36  
37  
38  
39  
40  
41

|    |                                               |
|----|-----------------------------------------------|
| 1  |                                               |
| 2  | <b>List of features - PPGR predictions</b>    |
| 3  | <b>Blood tests</b>                            |
| 4  | HbA1C%                                        |
| 5  | Hemoglobin                                    |
| 6  | FastingGlucose                                |
| 7  | <b>Anthropometric (measured at profiling)</b> |
| 8  | BMI                                           |
| 9  | BodyFat                                       |
| 10 | Waist                                         |
| 11 | Weight                                        |
| 12 | Hips                                          |
| 13 | <b>Dietary components of the meal</b>         |
| 14 | Alanine_g                                     |
| 15 | Alcohol_g                                     |
| 16 | Arginine_g                                    |
| 17 | Caffeine_mg                                   |
| 18 | Calcium_mg                                    |
| 19 | Carbohydrate_g                                |
| 20 | Cholesterol_mg                                |
| 21 | Energy_kcal                                   |
| 22 | Fructose_g                                    |
| 23 | Galactose_g                                   |
| 24 | Glucose_g                                     |
| 25 | Isoleucine_g                                  |
| 26 | Lactose_g                                     |
| 27 | Leucine_g                                     |
| 28 | Magnesium_mg                                  |
| 29 | Maltose_g                                     |
| 30 | Niacin_mg                                     |
| 31 | Phenylalanine_g                               |
| 32 | Protein_g                                     |
| 33 | Sodium_mg                                     |
| 34 | Starch_g                                      |
| 35 | Sucrose_g                                     |
| 36 | SugarsTotal_g                                 |
| 37 | Thiamin_mg                                    |
| 38 | TotalDietaryFiber_g                           |
| 39 | TotalLipid_g                                  |
| 40 | TotalMonounsaturatedFattyAcids_g              |
| 41 | TotalPolyunsaturatedFattyAcids_g              |
| 42 | TotalSaturatedFattyAcids_g                    |
| 43 | TotalTransFattyAcids_g                        |
| 44 | VitaminC_mg                                   |
| 45 | VitaminD_IU                                   |
| 46 | VitaminE_mg                                   |
| 47 | Water_g                                       |
| 48 | Zinc_mg                                       |
| 49 | <b>Health questionnaire</b>                   |
| 50 | Age                                           |
| 51 | Currently_smokes                              |
| 52 | Evening_Hunger                                |
| 53 | Ever_smoked                                   |
| 54 | Gender                                        |
| 55 |                                               |
| 56 |                                               |
| 57 |                                               |
| 58 |                                               |
| 59 |                                               |
| 60 |                                               |

1  
2  
3  
4  
5  
6  
7  
8  
9  
10  
11  
12  
13  
14  
15  
16  
17  
18  
19  
20  
21  
22  
23  
24  
25  
26  
27  
28  
29  
30  
31  
32  
33  
34  
35  
36  
37  
38  
39  
40  
41  
42  
43  
44  
45  
46  
47  
48  
49  
50  
51  
52  
53  
54  
55  
56  
57  
58  
59  
60

|                                     |
|-------------------------------------|
| General_Hunger                      |
| Is_pregnant                         |
| Midday_Hunger                       |
| Morning_Hunger                      |
| Physical_activity_-_freq            |
| Physical_activity_-_mins            |
| Regular_defecation                  |
| Sleep_quality                       |
| Stress                              |
| Work_activity                       |
| <b>Microbiome features</b>          |
| s_Acidaminococcus_unclassified      |
| s_Adlercreutzia_equolifaciens       |
| s_Akkermansia_muciniphila           |
| s_Alistipes_finegoldii              |
| s_Alistipes_indistinctus            |
| s_Alistipes_nderdonkii              |
| s_Alistipes_putredinis              |
| s_Alistipes_senegalensis            |
| s_Alistipes_shahii                  |
| s_Anaerostipes_hadrus               |
| s_Anaerotruncus_unclassified        |
| s_Bacteroidales_bacterium_ph8       |
| s_Bacteroides_caccae                |
| s_Bacteroides_cellulosilyticus      |
| s_Bacteroides_clarus                |
| s_Bacteroides_dorei                 |
| s_Bacteroides_eggerthii             |
| s_Bacteroides_faecis                |
| s_Bacteroides_finegoldii            |
| s_Bacteroides_fragilis              |
| s_Bacteroides_intestinalis          |
| s_Bacteroides_massiliensis          |
| s_Bacteroides_nordii                |
| s_Bacteroides_ovatus                |
| s_Bacteroides_plebeius              |
| s_Bacteroides_salyersiae            |
| s_Bacteroides_stercoris             |
| s_Bacteroides_thetaiotaomicron      |
| s_Bacteroides_uniformis             |
| s_Bacteroides_vulgatus              |
| s_Bacteroides_xylanisolvans         |
| s_Barnesiella_intestinihominis      |
| s_Bifidobacterium_adolescentis      |
| s_Bifidobacterium_animalis          |
| s_Bifidobacterium_bifidum           |
| s_Bifidobacterium_catenuatum        |
| s_Bifidobacterium_longum            |
| s_Bifidobacterium_pseudocatenulatum |
| s_Bilophila_unclassified            |
| s_Bilophila_wadsworthia             |
| s_Burkholderiales_bacterium_1_1_47  |
| s_Catenibacterium_mitsuokai         |

|    |                                             |
|----|---------------------------------------------|
| 1  | s_Clostridium_bartlettii                    |
| 2  | s_Clostridium_bolteae                       |
| 3  | s_Clostridium_leptum                        |
| 4  | s_Collinsella_aerofaciens                   |
| 5  | s_Coprobacter_fastidiosus                   |
| 6  | s_Coprococcus_catus                         |
| 7  | s_Coprococcus_comes                         |
| 8  | s_Coprococcus_sp_ART55_1                    |
| 9  | s_Desulfovibrio_desulfuricans               |
| 10 | s_Desulfovibrio_piger                       |
| 11 | s_Dorea_formicigenerans                     |
| 12 | s_Dorea_longicatena                         |
| 13 | s_Eggerthella_unclassified                  |
| 14 | s_Erysipelotrichaceae_bacterium_6_1_45      |
| 15 | s_Escherichia_coli                          |
| 16 | s_Escherichia_unclassified                  |
| 17 | s_Eubacterium_biforme                       |
| 18 | s_Eubacterium_eligens                       |
| 19 | s_Eubacterium_hallii                        |
| 20 | s_Eubacterium_ramulus                       |
| 21 | s_Eubacterium_rectale                       |
| 22 | s_Eubacterium_siraeum                       |
| 23 | s_Eubacterium_ventriosum                    |
| 24 | s_Faecalibacterium_prausnitzii              |
| 25 | s_Flavonifractor_plautii                    |
| 26 | s_Gordonibacter_pamelaeae                   |
| 27 | s_Haemophilus_parainfluenzae                |
| 28 | s_Holdemania_unclassified                   |
| 29 | s_Lachnospiraceae_bacterium_1_1_57FAA       |
| 30 | s_Lachnospiraceae_bacterium_2_1_58FAA       |
| 31 | s_Lachnospiraceae_bacterium_3_1_46FAA       |
| 32 | s_Lachnospiraceae_bacterium_5_1_63FAA       |
| 33 | s_Lachnospiraceae_bacterium_7_1_58FAA       |
| 34 | s_Lachnospiraceae_bacterium_8_1_57FAA       |
| 35 | s_Lactobacillus_ruminis                     |
| 36 | s_Lactococcus_lactis                        |
| 37 | s_Megamonas_unclassified                    |
| 38 | s_Methanobrevibacter_smithii                |
| 39 | s_Odoribacter_splanchnicus                  |
| 40 | s_Oscillibacter_unclassified                |
| 41 | s_Oxalobacter_formigenes                    |
| 42 | s_Parabacteroides_distasonis                |
| 43 | s_Parabacteroides_goldsteinii               |
| 44 | s_Parabacteroides_johnsonii                 |
| 45 | s_Parabacteroides_merdae                    |
| 46 | s_Parabacteroides_unclassified              |
| 47 | s_Paraprevotella_clara                      |
| 48 | s_Paraprevotella_unclassified               |
| 49 | s_Paraprevotella_xylaniphila                |
| 50 | s_Parasutterella_excrementihominis          |
| 51 | s_Peptostreptococcaceae_noname_unclassified |
| 52 | s_Phascalartobacterium_succinatutens        |
| 53 | s_Prevotella_copri                          |

1  
2  
3  
4  
5  
6  
7  
8  
9  
10  
11  
12  
13  
14  
15  
16  
17  
18  
19  
20  
21  
22  
23  
24  
25  
26  
27  
28  
29  
30  
31  
32  
33  
34  
35  
36  
37  
38  
39  
40  
41  
42  
43  
44  
45  
46  
47  
48  
49  
50  
51  
52  
53  
54  
55  
56  
57  
58  
59  
60

|                                |
|--------------------------------|
| s_Roseburia_hominis            |
| s_Roseburia_intestinalis       |
| s_Roseburia_inulinivorans      |
| s_Roseburia_unclassified       |
| s_Ruminococcus_albus           |
| s_Ruminococcus_bromii          |
| s_Ruminococcus_callidus        |
| s_Ruminococcus_gnavus          |
| s_Ruminococcus_lactaris        |
| s_Ruminococcus_obeum           |
| s_Ruminococcus_sp_5_1_39BFAA   |
| s_Ruminococcus_torques         |
| s_Streptococcus_parasanguinis  |
| s_Streptococcus_salivarius     |
| s_Streptococcus_thermophilus   |
| s_Subdoligranulum_unclassified |
| s_Sutterella_wadsworthensis    |
| s_Veillonella_parvula          |

# Reporting checklist for protocol of a clinical trial.

Based on the SPIRIT guidelines.

## Instructions to authors

Complete this checklist by entering the page numbers from your manuscript where readers will find each of the items listed below.

Your article may not currently address all the items on the checklist. Please modify your text to include the missing information. If you are certain that an item does not apply, please write "n/a" and provide a short explanation.

Upload your completed checklist as an extra file when you submit to a journal.

In your methods section, say that you used the SPIRIT reporting guidelines, and cite them as:

Chan A-W, Tetzlaff JM, Gøtzsche PC, Altman DG, Mann H, Berlin J, Dickersin K, Hróbjartsson A, Schulz KF, Parulekar WR, Krleža-Jerić K, Laupacis A, Moher D. SPIRIT 2013 Explanation and Elaboration: Guidance for protocols of clinical trials. *BMJ*. 2013;346:e7586

|                                   |                                                                                                                                 | Page   |
|-----------------------------------|---------------------------------------------------------------------------------------------------------------------------------|--------|
|                                   | Reporting Item                                                                                                                  | Number |
| <b>Administrative information</b> |                                                                                                                                 |        |
| Title                             | <a href="#">#1</a> Descriptive title identifying the study design, population, interventions, and, if applicable, trial acronym | 1      |

|    |                     |                     |                                                            |            |
|----|---------------------|---------------------|------------------------------------------------------------|------------|
| 1  | Trial registration  | <a href="#">#2a</a> | Trial identifier and registry name. If not yet registered, | 2          |
| 2  |                     |                     |                                                            |            |
| 3  |                     |                     |                                                            |            |
| 4  |                     |                     | name of intended registry                                  |            |
| 5  |                     |                     |                                                            |            |
| 6  | Trial registration: | <a href="#">#2b</a> | All items from the World Health Organization Trial         | n/a, We    |
| 7  |                     |                     |                                                            |            |
| 8  | data set            |                     | Registration Data Set                                      | added the  |
| 9  |                     |                     |                                                            |            |
| 10 |                     |                     |                                                            |            |
| 11 |                     |                     |                                                            | MOH        |
| 12 |                     |                     |                                                            |            |
| 13 |                     |                     |                                                            | identifier |
| 14 |                     |                     |                                                            |            |
| 15 |                     |                     |                                                            |            |
| 16 | Protocol version    | <a href="#">#3</a>  | Date and version identifier                                | Protocol   |
| 17 |                     |                     |                                                            |            |
| 18 |                     |                     |                                                            | attached   |
| 19 |                     |                     |                                                            |            |
| 20 |                     |                     |                                                            |            |
| 21 |                     |                     |                                                            |            |
| 22 | Funding             | <a href="#">#4</a>  | Sources and types of financial, material, and other        | 16         |
| 23 |                     |                     |                                                            |            |
| 24 |                     |                     | support                                                    |            |
| 25 |                     |                     |                                                            |            |
| 26 |                     |                     |                                                            |            |
| 27 | Roles and           | <a href="#">#5a</a> | Names, affiliations, and roles of protocol contributors    | 16-17      |
| 28 |                     |                     |                                                            |            |
| 29 | responsibilities:   |                     |                                                            |            |
| 30 |                     |                     |                                                            |            |
| 31 | contributorship     |                     |                                                            |            |
| 32 |                     |                     |                                                            |            |
| 33 |                     |                     |                                                            |            |
| 34 |                     |                     |                                                            |            |
| 35 | Roles and           | <a href="#">#5b</a> | Name and contact information for the trial sponsor         | 16         |
| 36 |                     |                     |                                                            |            |
| 37 | responsibilities:   |                     |                                                            |            |
| 38 |                     |                     |                                                            |            |
| 39 | sponsor contact     |                     |                                                            |            |
| 40 |                     |                     |                                                            |            |
| 41 | information         |                     |                                                            |            |
| 42 |                     |                     |                                                            |            |
| 43 |                     |                     |                                                            |            |
| 44 |                     |                     |                                                            |            |
| 45 | Roles and           | <a href="#">#5c</a> | Role of study sponsor and funders, if any, in study        | 16         |
| 46 |                     |                     |                                                            |            |
| 47 | responsibilities:   |                     | design; collection, management, analysis, and              |            |
| 48 |                     |                     |                                                            |            |
| 49 | sponsor and funder  |                     | interpretation of data; writing of the report; and the     |            |
| 50 |                     |                     |                                                            |            |
| 51 |                     |                     | decision to submit the report for publication, including   |            |
| 52 |                     |                     |                                                            |            |
| 53 |                     |                     | whether they will have ultimate authority over any of      |            |
| 54 |                     |                     |                                                            |            |
| 55 |                     |                     | these activities                                           |            |
| 56 |                     |                     |                                                            |            |
| 57 |                     |                     |                                                            |            |
| 58 |                     |                     |                                                            |            |
| 59 |                     |                     |                                                            |            |
| 60 |                     |                     |                                                            |            |

1 Roles and [#5d](#) Composition, roles, and responsibilities of the 16  
 2  
 3 responsibilities: coordinating centre, steering committee, endpoint  
 4  
 5 committees adjudication committee, data management team, and  
 6  
 7 other individuals or groups overseeing the trial, if  
 8  
 9 applicable (see Item 21a for data monitoring  
 10  
 11 committee)  
 12  
 13  
 14

## 15 Introduction

16  
 17  
 18  
 19 Background and [#6a](#) Description of research question and justification for 3  
 20  
 21 rationale undertaking the trial, including summary of relevant  
 22  
 23 studies (published and unpublished) examining  
 24  
 25 benefits and harms for each intervention  
 26  
 27

28  
 29 Background and [#6b](#) Explanation for choice of comparators 4  
 30  
 31 rationale: choice of  
 32  
 33 comparators  
 34  
 35

36 Objectives [#7](#) Specific objectives or hypotheses 4  
 37  
 38

39 Trial design [#8](#) Description of trial design including type of trial (eg, 4, figure 1  
 40  
 41 parallel group, crossover, factorial, single group),  
 42  
 43 allocation ratio, and framework (eg, superiority,  
 44  
 45 equivalence, non-inferiority, exploratory)  
 46  
 47  
 48

## 49 Methods:

50  
 51 Participants,  
 52  
 53 interventions, and  
 54  
 55 outcomes  
 56  
 57  
 58  
 59  
 60



|    |                      |                      |                                                            |           |
|----|----------------------|----------------------|------------------------------------------------------------|-----------|
| 1  | Study setting        | <a href="#">#9</a>   | Description of study settings (eg, community clinic,       | 5         |
| 2  |                      |                      | academic hospital) and list of countries where data will   |           |
| 3  |                      |                      | be collected. Reference to where list of study sites can   |           |
| 4  |                      |                      | be obtained                                                |           |
| 5  |                      |                      |                                                            |           |
| 6  |                      |                      |                                                            |           |
| 7  |                      |                      |                                                            |           |
| 8  |                      |                      |                                                            |           |
| 9  |                      |                      |                                                            |           |
| 10 |                      |                      |                                                            |           |
| 11 | Eligibility criteria | <a href="#">#10</a>  | Inclusion and exclusion criteria for participants. If      | Table 1,  |
| 12 |                      |                      | applicable, eligibility criteria for study centres and     | page 7    |
| 13 |                      |                      | individuals who will perform the interventions (eg,        |           |
| 14 |                      |                      | surgeons, psychotherapists)                                |           |
| 15 |                      |                      |                                                            |           |
| 16 |                      |                      |                                                            |           |
| 17 |                      |                      |                                                            |           |
| 18 |                      |                      |                                                            |           |
| 19 |                      |                      |                                                            |           |
| 20 |                      |                      |                                                            |           |
| 21 | Interventions:       | <a href="#">#11a</a> | Interventions for each group with sufficient detail to     | 8-11      |
| 22 | description          |                      | allow replication, including how and when they will be     |           |
| 23 |                      |                      | administered                                               |           |
| 24 |                      |                      |                                                            |           |
| 25 |                      |                      |                                                            |           |
| 26 |                      |                      |                                                            |           |
| 27 |                      |                      |                                                            |           |
| 28 |                      |                      |                                                            |           |
| 29 | Interventions:       | <a href="#">#11b</a> | Criteria for discontinuing or modifying allocated          | 6-7       |
| 30 | modifications        |                      | interventions for a given trial participant (eg, drug dose |           |
| 31 |                      |                      | change in response to harms, participant request, or       |           |
| 32 |                      |                      | improving / worsening disease)                             |           |
| 33 |                      |                      |                                                            |           |
| 34 |                      |                      |                                                            |           |
| 35 |                      |                      |                                                            |           |
| 36 |                      |                      |                                                            |           |
| 37 |                      |                      |                                                            |           |
| 38 |                      |                      |                                                            |           |
| 39 | Interventions:       | <a href="#">#11c</a> | Strategies to improve adherence to intervention            | 12-13;    |
| 40 | adherence            |                      | protocols, and any procedures for monitoring               | Figure 2c |
| 41 |                      |                      | adherence (eg, drug tablet return; laboratory tests)       |           |
| 42 |                      |                      |                                                            |           |
| 43 |                      |                      |                                                            |           |
| 44 |                      |                      |                                                            |           |
| 45 |                      |                      |                                                            |           |
| 46 | Interventions:       | <a href="#">#11d</a> | Relevant concomitant care and interventions that are       | Table 1,  |
| 47 | concomitant care     |                      | permitted or prohibited during the trial                   | page 7    |
| 48 |                      |                      |                                                            |           |
| 49 |                      |                      |                                                            |           |
| 50 |                      |                      |                                                            |           |
| 51 | Outcomes             | <a href="#">#12</a>  | Primary, secondary, and other outcomes, including the      | 14, Box 1 |
| 52 |                      |                      | specific measurement variable (eg, systolic blood          |           |
| 53 |                      |                      | pressure), analysis metric (eg, change from baseline,      |           |
| 54 |                      |                      |                                                            |           |
| 55 |                      |                      |                                                            |           |
| 56 |                      |                      |                                                            |           |
| 57 |                      |                      |                                                            |           |
| 58 |                      |                      |                                                            |           |
| 59 |                      |                      |                                                            |           |
| 60 |                      |                      |                                                            |           |

1 final value, time to event), method of aggregation (eg,  
 2 median, proportion), and time point for each outcome.  
 3  
 4 Explanation of the clinical relevance of chosen efficacy  
 5 and harm outcomes is strongly recommended  
 6  
 7  
 8  
 9

10 Participant timeline [#13](#) Time schedule of enrolment, interventions (including Figure 1 ;  
 11 any run-ins and washouts), assessments, and visits for 8-12  
 12 participants. A schematic diagram is highly  
 13 recommended (see Figure)  
 14  
 15  
 16  
 17  
 18  
 19

20 Sample size [#14](#) Estimated number of participants needed to achieve 12  
 21 study objectives and how it was determined, including  
 22 clinical and statistical assumptions supporting any  
 23 sample size calculations  
 24  
 25  
 26  
 27  
 28  
 29

30 Recruitment [#15](#) Strategies for achieving adequate participant 6  
 31 enrolment to reach target sample size  
 32  
 33  
 34

## 35 Methods:

### 36 37 38 Assignment of 39 40 interventions (for 41 42 controlled trials) 43 44

45 Allocation: sequence [#16a](#) Method of generating the allocation sequence (eg, 11  
 46 generation computer-generated random numbers), and list of any  
 47 factors for stratification. To reduce predictability of a  
 48 random sequence, details of any planned restriction  
 49 (eg, blocking) should be provided in a separate  
 50  
 51  
 52  
 53  
 54  
 55  
 56  
 57  
 58  
 59  
 60

|    |                      |                                                                            |      |
|----|----------------------|----------------------------------------------------------------------------|------|
| 1  |                      | document that is unavailable to those who enrol                            |      |
| 2  |                      |                                                                            |      |
| 3  |                      | participants or assign interventions                                       |      |
| 4  |                      |                                                                            |      |
| 5  |                      |                                                                            |      |
| 6  | Allocation           | <a href="#">#16b</a> Mechanism of implementing the allocation sequence     | 11   |
| 7  |                      |                                                                            |      |
| 8  | concealment          | (eg, central telephone; sequentially numbered,                             |      |
| 9  |                      |                                                                            |      |
| 10 | mechanism            | opaque, sealed envelopes), describing any steps to                         |      |
| 11 |                      |                                                                            |      |
| 12 |                      | conceal the sequence until interventions are assigned                      |      |
| 13 |                      |                                                                            |      |
| 14 |                      |                                                                            |      |
| 15 |                      |                                                                            |      |
| 16 | Allocation:          | <a href="#">#16c</a> Who will generate the allocation sequence, who will   | 11   |
| 17 |                      |                                                                            |      |
| 18 | implementation       | enrol participants, and who will assign participants to                    |      |
| 19 |                      |                                                                            |      |
| 20 |                      | interventions                                                              |      |
| 21 |                      |                                                                            |      |
| 22 |                      |                                                                            |      |
| 23 | Blinding (masking)   | <a href="#">#17a</a> Who will be blinded after assignment to interventions | 11   |
| 24 |                      |                                                                            |      |
| 25 |                      | (eg, trial participants, care providers, outcome                           |      |
| 26 |                      |                                                                            |      |
| 27 |                      | assessors, data analysts), and how                                         |      |
| 28 |                      |                                                                            |      |
| 29 |                      |                                                                            |      |
| 30 |                      |                                                                            |      |
| 31 | Blinding (masking):  | <a href="#">#17b</a> If blinded, circumstances under which unblinding is   | 12   |
| 32 |                      |                                                                            |      |
| 33 | emergency            | permissible, and procedure for revealing a participant's                   |      |
| 34 |                      |                                                                            |      |
| 35 | unblinding           | allocated intervention during the trial                                    |      |
| 36 |                      |                                                                            |      |
| 37 |                      |                                                                            |      |
| 38 |                      |                                                                            |      |
| 39 | <b>Methods: Data</b> |                                                                            |      |
| 40 |                      |                                                                            |      |
| 41 | collection,          |                                                                            |      |
| 42 |                      |                                                                            |      |
| 43 | management, and      |                                                                            |      |
| 44 |                      |                                                                            |      |
| 45 | analysis             |                                                                            |      |
| 46 |                      |                                                                            |      |
| 47 |                      |                                                                            |      |
| 48 | Data collection plan | <a href="#">#18a</a> Plans for assessment and collection of outcome,       | 9-11 |
| 49 |                      |                                                                            |      |
| 50 |                      | baseline, and other trial data, including any related                      |      |
| 51 |                      |                                                                            |      |
| 52 |                      | processes to promote data quality (eg, duplicate                           |      |
| 53 |                      |                                                                            |      |
| 54 |                      | measurements, training of assessors) and a                                 |      |
| 55 |                      |                                                                            |      |
| 56 |                      | description of study instruments (eg, questionnaires,                      |      |
| 57 |                      |                                                                            |      |
| 58 |                      |                                                                            |      |
| 59 |                      |                                                                            |      |
| 60 |                      |                                                                            |      |

laboratory tests) along with their reliability and validity,  
 if known. Reference to where data collection forms can  
 be found, if not in the protocol

|                                                                                  |                                                  |                                                                                                                                                                                                                                                                                       |           |
|----------------------------------------------------------------------------------|--------------------------------------------------|---------------------------------------------------------------------------------------------------------------------------------------------------------------------------------------------------------------------------------------------------------------------------------------|-----------|
| 1<br>2<br>3<br>4<br>5<br>6<br>7                                                  |                                                  |                                                                                                                                                                                                                                                                                       |           |
| 8<br>9<br>10<br>11<br>12<br>13<br>14<br>15<br>16<br>17                           | Data collection plan: retention                  | <a href="#">#18b</a> Plans to promote participant retention and complete follow-up, including list of any outcome data to be collected for participants who discontinue or deviate from intervention protocols                                                                        | Figure 2A |
| 18<br>19<br>20<br>21<br>22<br>23<br>24<br>25<br>26<br>27<br>28<br>29<br>30<br>31 | Data management                                  | <a href="#">#19</a> Plans for data entry, coding, security, and storage, including any related processes to promote data quality (eg, double data entry; range checks for data values). Reference to where details of data management procedures can be found, if not in the protocol | 8,15      |
| 32<br>33<br>34<br>35<br>36<br>37<br>38<br>39<br>40<br>41                         | Statistics: outcomes                             | <a href="#">#20a</a> Statistical methods for analysing primary and secondary outcomes. Reference to where other details of the statistical analysis plan can be found, if not in the protocol                                                                                         | 14-15     |
| 42<br>43<br>44<br>45<br>46                                                       | Statistics: additional analyses                  | <a href="#">#20b</a> Methods for any additional analyses (eg, subgroup and adjusted analyses)                                                                                                                                                                                         | 14-15     |
| 47<br>48<br>49<br>50<br>51<br>52<br>53<br>54<br>55<br>56                         | Statistics: analysis population and missing data | <a href="#">#20c</a> Definition of analysis population relating to protocol non-adherence (eg, as randomised analysis), and any statistical methods to handle missing data (eg, multiple imputation)                                                                                  | 14-15     |

## Methods: Monitoring

|    |                      |                      |                                                          |     |
|----|----------------------|----------------------|----------------------------------------------------------|-----|
| 1  | Data monitoring:     | <a href="#">#21a</a> | Composition of data monitoring committee (DMC);          | n/a |
| 2  |                      |                      |                                                          |     |
| 3  | formal committee     |                      | summary of its role and reporting structure; statement   |     |
| 4  |                      |                      | of whether it is independent from the sponsor and        |     |
| 5  |                      |                      | competing interests; and reference to where further      |     |
| 6  |                      |                      | details about its charter can be found, if not in the    |     |
| 7  |                      |                      | protocol. Alternatively, an explanation of why a DMC is  |     |
| 8  |                      |                      | not needed                                               |     |
| 9  |                      |                      |                                                          |     |
| 10 |                      |                      |                                                          |     |
| 11 |                      |                      |                                                          |     |
| 12 |                      |                      |                                                          |     |
| 13 |                      |                      |                                                          |     |
| 14 |                      |                      |                                                          |     |
| 15 |                      |                      |                                                          |     |
| 16 |                      |                      |                                                          |     |
| 17 |                      |                      |                                                          |     |
| 18 | Data monitoring:     | <a href="#">#21b</a> | Description of any interim analyses and stopping         | n/a |
| 19 | interim analysis     |                      | guidelines, including who will have access to these      |     |
| 20 |                      |                      | interim results and make the final decision to terminate |     |
| 21 |                      |                      | the trial                                                |     |
| 22 |                      |                      |                                                          |     |
| 23 |                      |                      |                                                          |     |
| 24 |                      |                      |                                                          |     |
| 25 |                      |                      |                                                          |     |
| 26 |                      |                      |                                                          |     |
| 27 |                      |                      |                                                          |     |
| 28 | Harms                | <a href="#">#22</a>  | Plans for collecting, assessing, reporting, and          | 12  |
| 29 |                      |                      | managing solicited and spontaneously reported            |     |
| 30 |                      |                      | adverse events and other unintended effects of trial     |     |
| 31 |                      |                      | interventions or trial conduct                           |     |
| 32 |                      |                      |                                                          |     |
| 33 |                      |                      |                                                          |     |
| 34 |                      |                      |                                                          |     |
| 35 |                      |                      |                                                          |     |
| 36 |                      |                      |                                                          |     |
| 37 |                      |                      |                                                          |     |
| 38 | Auditing             | <a href="#">#23</a>  | Frequency and procedures for auditing trial conduct, if  | n/a |
| 39 |                      |                      | any, and whether the process will be independent from    |     |
| 40 |                      |                      | investigators and the sponsor                            |     |
| 41 |                      |                      |                                                          |     |
| 42 |                      |                      |                                                          |     |
| 43 |                      |                      |                                                          |     |
| 44 |                      |                      |                                                          |     |
| 45 | <b>Ethics and</b>    |                      |                                                          |     |
| 46 | <b>dissemination</b> |                      |                                                          |     |
| 47 |                      |                      |                                                          |     |
| 48 |                      |                      |                                                          |     |
| 49 |                      |                      |                                                          |     |
| 50 |                      |                      |                                                          |     |
| 51 | Research ethics      | <a href="#">#24</a>  | Plans for seeking research ethics committee /            | 2   |
| 52 | approval             |                      | institutional review board (REC / IRB) approval          |     |
| 53 |                      |                      |                                                          |     |
| 54 |                      |                      |                                                          |     |
| 55 |                      |                      |                                                          |     |
| 56 |                      |                      |                                                          |     |
| 57 |                      |                      |                                                          |     |
| 58 |                      |                      |                                                          |     |
| 59 |                      |                      |                                                          |     |
| 60 |                      |                      |                                                          |     |

|                                                             |                                      |                      |                                                                                                                                                                                                                                    |     |
|-------------------------------------------------------------|--------------------------------------|----------------------|------------------------------------------------------------------------------------------------------------------------------------------------------------------------------------------------------------------------------------|-----|
| 1<br>2<br>3<br>4<br>5<br>6<br>7<br>8<br>9<br>10<br>11<br>12 | Protocol amendments                  | <a href="#">#25</a>  | Plans for communicating important protocol modifications (eg, changes to eligibility criteria, outcomes, analyses) to relevant parties (eg, investigators, REC / IRBs, trial participants, trial registries, journals, regulators) | n/a |
| 13<br>14<br>15<br>16<br>17<br>18<br>19<br>20                | Consent or assent                    | <a href="#">#26a</a> | Who will obtain informed consent or assent from potential trial participants or authorised surrogates, and how (see Item 32)                                                                                                       | 13  |
| 21<br>22<br>23<br>24<br>25<br>26<br>27                      | Consent or assent: ancillary studies | <a href="#">#26b</a> | Additional consent provisions for collection and use of participant data and biological specimens in ancillary studies, if applicable                                                                                              | 15  |
| 28<br>29<br>30<br>31<br>32<br>33<br>34<br>35<br>36<br>37    | Confidentiality                      | <a href="#">#27</a>  | How personal information about potential and enrolled participants will be collected, shared, and maintained in order to protect confidentiality before, during, and after the trial                                               | 15  |
| 38<br>39<br>40<br>41<br>42<br>43                            | Declaration of interests             | <a href="#">#28</a>  | Financial and other competing interests for principal investigators for the overall trial and each study site                                                                                                                      | 14  |
| 44<br>45<br>46<br>47<br>48<br>49<br>50                      | Data access                          | <a href="#">#29</a>  | Statement of who will have access to the final trial dataset, and disclosure of contractual agreements that limit such access for investigators                                                                                    | 15  |
| 51<br>52<br>53<br>54<br>55<br>56<br>57<br>58<br>59<br>60    | Ancillary and post trial care        | <a href="#">#30</a>  | Provisions, if any, for ancillary and post-trial care, and for compensation to those who suffer harm from trial participation                                                                                                      | 12  |

|    |                                            |                                                           |     |
|----|--------------------------------------------|-----------------------------------------------------------|-----|
| 1  | Dissemination policy: <a href="#">#31a</a> | Plans for investigators and sponsor to communicate        | 15  |
| 2  |                                            |                                                           |     |
| 3  | trial results                              | trial results to participants, healthcare professionals,  |     |
| 4  |                                            | the public, and other relevant groups (eg, via            |     |
| 5  |                                            | publication, reporting in results databases, or other     |     |
| 6  |                                            | data sharing arrangements), including any publication     |     |
| 7  |                                            | restrictions                                              |     |
| 8  |                                            |                                                           |     |
| 9  |                                            |                                                           |     |
| 10 |                                            |                                                           |     |
| 11 | Dissemination policy: <a href="#">#31b</a> | Authorship eligibility guidelines and any intended use    | 15  |
| 12 |                                            |                                                           |     |
| 13 | authorship                                 | of professional writers                                   |     |
| 14 |                                            |                                                           |     |
| 15 |                                            |                                                           |     |
| 16 | Dissemination policy: <a href="#">#31c</a> | Plans, if any, for granting public access to the full     | 15  |
| 17 |                                            |                                                           |     |
| 18 | reproducible                               | protocol, participant-level dataset, and statistical code |     |
| 19 |                                            |                                                           |     |
| 20 | research                                   |                                                           |     |
| 21 |                                            |                                                           |     |
| 22 |                                            |                                                           |     |
| 23 |                                            |                                                           |     |
| 24 |                                            |                                                           |     |
| 25 |                                            |                                                           |     |
| 26 |                                            |                                                           |     |
| 27 |                                            |                                                           |     |
| 28 | <b>Appendices</b>                          |                                                           |     |
| 29 |                                            |                                                           |     |
| 30 |                                            |                                                           |     |
| 31 |                                            |                                                           |     |
| 32 | Informed consent <a href="#">#32</a>       | Model consent form and other related documentation        | n/a |
| 33 |                                            |                                                           |     |
| 34 | materials                                  | given to participants and authorised surrogates           |     |
| 35 |                                            |                                                           |     |
| 36 |                                            |                                                           |     |
| 37 | Biological specimens <a href="#">#33</a>   | Plans for collection, laboratory evaluation, and storage  | 15  |
| 38 |                                            |                                                           |     |
| 39 |                                            | of biological specimens for genetic or molecular          |     |
| 40 |                                            | analysis in the current trial and for future use in       |     |
| 41 |                                            | ancillary studies, if applicable                          |     |
| 42 |                                            |                                                           |     |
| 43 |                                            |                                                           |     |
| 44 |                                            |                                                           |     |
| 45 |                                            |                                                           |     |
| 46 |                                            |                                                           |     |

## Notes:

- 2b: n/a, We added the MOH identifier
- 8: 4, figure 1
- 11c: 11; figure 2c

- 1 • 12: 12-13, Box 1
- 2
- 3
- 4 • 13: Figure 1 ; 6-9 The SPIRIT Explanation and Elaboration paper is distributed under the terms
- 5 of the Creative Commons Attribution License CC-BY-NC. This checklist was completed on 24.
- 6 February 2022 using <https://www.goodreports.org/>, a tool made by the [EQUATOR Network](#) in
- 7 collaboration with [Penelope.ai](#)
- 8
- 9
- 10
- 11
- 12
- 13
- 14
- 15
- 16
- 17
- 18
- 19
- 20
- 21
- 22
- 23
- 24
- 25
- 26
- 27
- 28
- 29
- 30
- 31
- 32
- 33
- 34
- 35
- 36
- 37
- 38
- 39
- 40
- 41
- 42
- 43
- 44
- 45
- 46
- 47
- 48
- 49
- 50
- 51
- 52
- 53
- 54
- 55
- 56
- 57
- 58
- 59
- 60



# BMJ Open

## BREast Cancer Personalized NuTrition (BREACPNT) - dietary intervention in breast cancer survivors treated with endocrine therapy: Rational and study design

|                                 |                                                                                                                                                                                                                                                                                                                                                                                                                                                                                                                                                                                                                                                                                                                                                                                                                                                                                                                                                                                                                                                                                                                                                                                                                                                                                                                                                                                                                                            |
|---------------------------------|--------------------------------------------------------------------------------------------------------------------------------------------------------------------------------------------------------------------------------------------------------------------------------------------------------------------------------------------------------------------------------------------------------------------------------------------------------------------------------------------------------------------------------------------------------------------------------------------------------------------------------------------------------------------------------------------------------------------------------------------------------------------------------------------------------------------------------------------------------------------------------------------------------------------------------------------------------------------------------------------------------------------------------------------------------------------------------------------------------------------------------------------------------------------------------------------------------------------------------------------------------------------------------------------------------------------------------------------------------------------------------------------------------------------------------------------|
| Journal:                        | <i>BMJ Open</i>                                                                                                                                                                                                                                                                                                                                                                                                                                                                                                                                                                                                                                                                                                                                                                                                                                                                                                                                                                                                                                                                                                                                                                                                                                                                                                                                                                                                                            |
| Manuscript ID                   | bmjopen-2022-062498.R1                                                                                                                                                                                                                                                                                                                                                                                                                                                                                                                                                                                                                                                                                                                                                                                                                                                                                                                                                                                                                                                                                                                                                                                                                                                                                                                                                                                                                     |
| Article Type:                   | Protocol                                                                                                                                                                                                                                                                                                                                                                                                                                                                                                                                                                                                                                                                                                                                                                                                                                                                                                                                                                                                                                                                                                                                                                                                                                                                                                                                                                                                                                   |
| Date Submitted by the Author:   | 02-Aug-2022                                                                                                                                                                                                                                                                                                                                                                                                                                                                                                                                                                                                                                                                                                                                                                                                                                                                                                                                                                                                                                                                                                                                                                                                                                                                                                                                                                                                                                |
| Complete List of Authors:       | Rein, Michal; Weizmann Institute of Science, Department of Computer Science and Applied Mathematics; Weizmann Institute of Science, Department of Molecular Cell Biology<br>Dadiani, Maya; Sheba Medical Center, Cancer Research Center<br>Godneva, Anastasia; Weizmann Institute of Science, Department of Computer Science and Applied Mathematics; Weizmann Institute of Science, Department of Molecular Cell Biology<br>Bakalenik-Gavry, Michal; Sheba Medical Center, Cancer Research Center<br>Morzaev-Sulzbach, Dana; Sheba Medical Center, Cancer Research Center<br>Vachnish, Yaeli; Sheba Medical Center, Cancer Research Center<br>Kolobkov, Dmitry; Weizmann Institute of Science, Department of Computer Science and Applied Mathematics; Weizmann Institute of Science, Department of Molecular Cell Biology<br>Lotan-Pompan, maya; Weizmann Institute of Science, Department of Computer Science and Applied Mathematics; Weizmann Institute of Science, Department of Molecular Cell Biology<br>Weinberger, Adina; Weizmann Institute of Science, Department of Computer Science and Applied Mathematics; Weizmann Institute of Science, Department of Molecular Cell Biology<br>Segal, Eran; Weizmann Institute of Science, Department of Computer Science and Applied Mathematics; Weizmann Institute of Science, Department of Molecular Cell Biology<br>Gal-Yam, Einav Nili; Sheba Medical Center, Oncology Institute |
| <b>Primary Subject Heading</b>: | Oncology                                                                                                                                                                                                                                                                                                                                                                                                                                                                                                                                                                                                                                                                                                                                                                                                                                                                                                                                                                                                                                                                                                                                                                                                                                                                                                                                                                                                                                   |
| Secondary Subject Heading:      | Nutrition and metabolism                                                                                                                                                                                                                                                                                                                                                                                                                                                                                                                                                                                                                                                                                                                                                                                                                                                                                                                                                                                                                                                                                                                                                                                                                                                                                                                                                                                                                   |
| Keywords:                       | NUTRITION & DIETETICS, Breast tumours < ONCOLOGY, Microbiology < NATURAL SCIENCE DISCIPLINES                                                                                                                                                                                                                                                                                                                                                                                                                                                                                                                                                                                                                                                                                                                                                                                                                                                                                                                                                                                                                                                                                                                                                                                                                                                                                                                                               |
|                                 |                                                                                                                                                                                                                                                                                                                                                                                                                                                                                                                                                                                                                                                                                                                                                                                                                                                                                                                                                                                                                                                                                                                                                                                                                                                                                                                                                                                                                                            |

SCHOLARONE™  
Manuscripts

1  
2  
3 **BREast Cancer Personalized NuTrition (BREACPNT) - dietary intervention in**  
4 **breast cancer survivors treated with endocrine therapy: Protocol for a randomized**  
5 **clinical trial**  
6  
7

8 Michal Rein<sup>3,4</sup>, Maya Dadiani<sup>1</sup>, Anastasia Godneva<sup>3,4</sup>, Michal Bakalenik-Gavry<sup>1</sup>, Dana  
9 Morzaev-Sulzbach<sup>1</sup>, Yaeli Vachnish<sup>1</sup>, Dmitry Kolobkov<sup>3,4</sup>, Maya Lotan-Pompan<sup>3,4</sup>,  
10 Adina Weinberger<sup>3,4</sup>, Eran Segal<sup>3,4</sup> and Einav Nili Gal-Yam<sup>2</sup>  
11  
12  
13  
14

15 <sup>1</sup>Sheba Medical Center, Cancer Research Center, Tel-Hashomer, Ramat Gan, 5262100, Israel

16 <sup>2</sup>Sheba Medical Center, Oncology Institute, Tel-Hashomer, Ramat Gan, 5262100, Israel

17 <sup>3</sup>Department of Computer Science and Applied Mathematics, Weizmann Institute of Science, Rehovot 7610001, Israel

18 <sup>4</sup>Department of Molecular Cell Biology, Weizmann Institute of Science, Rehovot 7610001, Israel  
19

20 **Corresponding authors**  
21

22 Correspondence to Dr Einav Nili Gal-Yam<sup>2</sup>, [Einav.NiliGalYam@sheba.health.gov.il](mailto:Einav.NiliGalYam@sheba.health.gov.il) Prof. Eran Segal<sup>3,4</sup>, [eran.segal@weizmann.ac.il](mailto:eran.segal@weizmann.ac.il)  
23  
24

25 <sup>2</sup>Sheba Medical Center, Oncology Institute, Tel-Hashomer, Ramat Gan, 5262100, Israel

26 <sup>3</sup>Department of Computer Science and Applied Mathematics, Weizmann Institute of Science, Rehovot 7610001, Israel

27 <sup>4</sup>Department of Molecular Cell Biology, Weizmann Institute of Science, Rehovot 7610001, Israel  
28  
29  
30  
31  
32  
33  
34  
35  
36  
37  
38  
39  
40  
41  
42  
43  
44  
45  
46  
47  
48  
49  
50  
51  
52  
53  
54  
55  
56  
57  
58  
59  
60

Word count: 3984

**ABSTRACT**

**Introduction:** Breast cancer survivors treated with adjuvant endocrine therapy commonly experience weight gain, which has been associated with low adherence to therapy and worse breast cancer prognosis. We aim to assess whether a personalized postprandial glucose targeting diet will be beneficial for weight management as compared to the recommended Mediterranean diet in this patient population

**Methods and Analysis:** The BREAst Cancer Personalized NuTrition (BREACPNT) study is a phase-2 randomized trial in Hormone Receptor positive (HR+) breast cancer patients, treated with adjuvant endocrine therapy. The study objective is to assess whether dietary intervention intended to improve postprandial glyceic response to meals results in better weight and glyceic control in this population as compared to the standard recommended Mediterranean diet. Consenting participants will be assigned in a single blinded fashion to either of two dietary arms (Mediterranean diet or an algorithm-based personalized diet). They will be asked to provide a stool sample for microbiome analysis and will undergo continuous glucose monitoring for two weeks, at the initiation and termination of the intervention period. Microbiome composition data will be used to tailor personal dietary recommendations. After randomization and provision of dietary recommendations, participants will be asked to continuously log their diet and lifestyle activities on a designated smartphone application during the 6-month intervention period, during which they will be monthly monitored by a certified dietitian. Participants' clinical records will be followed twice yearly for five years for treatment adherence, disease free survival and recurrence.

**Ethics and dissemination:** The study has been approved by the ethics committee in the Sheba medical center (file 5725-18-SMC, Ramat Gan, Israel) and the Weizmann Institutional Review Board (file 693-2, Rehovot, Israel). The finding of the study will be published in a peer reviewed publication.

ClinicalTrials.gov Identifier: NCT04079270

MOH Identifier: 2019-03-28\_006056

### Strengths and limitations of this study

- A trial testing the efficacy of Personalized Postprandial-glucose-response Targeting (PPT) diet, based on an innovative dietary approach for weight maintenance, as compared to standard diet, in breast cancer survivors.
- The personalized diet involves advanced technologies, including microbiome, continuous glucose monitoring, metabolomics features and full dietary records are used to allow better understanding of the interactions between dietary intake with metabolic and health parameters.
- A homogenous study population, that includes HR+, early stage breast cancer survivors treated with adjuvant endocrine therapy. Patients are randomized into the two study arms and stratified by stage, treatment type, menopausal status and BMI. Yet, the study patients are representative of women from the center of Israel.
- The study design includes daily use of smartphone application for logging dietary intake and lifestyle events. While this may improve patient' adherence to diet, it can lead to exclusion of patients who do not hold a smartphone or with no capability to work with a smartphone app on a daily basis.

### INTRODUCTION

The majority (~75%) of breast cancer patients are diagnosed with hormone receptor-positive (HR+) tumors and are assigned adjuvant endocrine treatment (ET) for a period of at least 5 years, which was shown to improve survival. However, adjuvant ET is associated with distressing side-effects which may be long lasting and substantially impair patients' quality of life and adherence to treatment. These side effects include weight gain and body composition changes, which are common in breast cancer survivors and are experienced by many women during treatment and for years after diagnosis(1–3). Weight gain in this population is complex and is

1  
2  
3 associated with various factors such as tumor type, menopausal status(4), pre-  
4 diagnosis body mass index (BMI)(5) and neo-adjuvant/adjuvant treatment type  
5 including chemotherapy and ET(2,6). Importantly, weight gain after breast cancer  
6 diagnosis is associated with increased risk for metabolic syndrome and cardiac disease  
7 (7,8), and was reported as a risk factor for breast cancer recurrence and shorter  
8 survival(4,9,10). Therefore, weight management strategies including diet, regular  
9 physical activity and cognitive behavioral therapy are recommended for controlling  
10 weight gain in breast cancer patients. Previous studies showed that weight loss  
11 interventions, incorporating diet, exercise and psychosocial support, in overweight or  
12 obese breast cancer survivors appear to result in decreased body weight, BMI and  
13 waist circumference and improvement in overall quality of life(11). We chose the  
14 Mediterranean (MED) diet as a control diet because it is commonly recommended in  
15 different countries including Israel(12) and was suggested to improve metabolic  
16 health in the general population as well as within breast cancer survivors(13–15). Still,  
17 the optimal weight loss intervention method and the impact of weight loss on survival  
18 outcomes is unclear. Furthermore, the interaction between the microbiome of breast  
19 cancer patients and dietary intervention has not been assessed.

20  
21  
22  
23  
24  
25  
26  
27  
28  
29  
30  
31  
32  
33  
34  
35 The comprehensive role of the gut microbiome in modulating immune and  
36 metabolic health is increasingly recognized. Dysbiosis, referring to the disruption in  
37 the balance of gut bacterial communities, is associated with many conditions(16). The  
38 gut microbiome homeostasis can be influenced by internal factors, such as genetic,  
39 age-related and hormonal-related, as well as by external factors, such as stress,  
40 lifestyle and antibiotics(17). In addition, the microbiome is directly affected by the  
41 individual diet which in turn affects the body's response to food (18,19). Particularly  
42 relevant to breast cancer, diet plays an important role in creating a microbiome  
43 environment involved in estrogen metabolism(20). High estrogen levels contribute to  
44 breast cancer risk in postmenopausal women(21). In a recent study, gut microbiome  
45 diversity was linked to weight gain(22) and microbiome alterations were found to  
46 contribute to post-dieting weight regain(23). In addition, it was found that the  
47 increase in breast cancer risk with increasing BMI among postmenopausal women is  
48 associated with an increase in estrogens, particularly bioavailable estradiol (24). In a  
49  
50  
51  
52  
53  
54  
55  
56  
57  
58  
59  
60

1  
2  
3 previous study we showed in an unprecedented scale of 800 people that individuals  
4 vary greatly in their glycemic response to the same food(25). Importantly, this study  
5 emphasized the involvement of functional microbial pathways and bacterial taxa in  
6 host glucose metabolism. This unique dataset yielded an algorithm capable of  
7 accurately predicting personalized postprandial glycemic response (PPGR) to arbitrary  
8 meals. The algorithm's predictions are based on personal measurements, including  
9 blood tests, personal lifestyle and gut bacteria profiles. In a following study  
10 implementing a 6-month dietary intervention plan in individuals with prediabetes, the  
11 Personalized Postprandial-glucose-response Targeting (PPT) approach significantly  
12 improved glycemic control and reduced PPGRs as compared to the commonly  
13 recommended Mediterranean diet (26).

14  
15  
16  
17  
18  
19  
20  
21  
22  
23  
24 In this study we seek to evaluate the clinical efficacy of the PPT diet combined  
25 with caloric restriction, compared to the Mediterranean diet, in promoting weight  
26 maintenance or weight loss and glycemic control in HR+ early stage breast cancer  
27 survivors treated with adjuvant ET.

## 28 29 30 31 32 **METHODS**

### 33 34 35 **Study design**

36  
37 This study is a two-arm, parallel group, single-blinded, randomized controlled trial in  
38 early stage HR+ breast cancer patients treated with adjuvant endocrine therapy.  
39 Eligible participants will undergo a 6-month nutrition intervention program which will  
40 include dietary recommendations, daily logging and monthly follow up meetings  
41 provided by a certified dietician. Upon trial entry and after profiling (described below)  
42 participants will be randomly and equally assigned to the Personalized Postprandial-  
43 glucose-response Targeting (PPT) dietary (arm A) or to the Mediterranean-style (MED)  
44 dietary (arm B). All meetings will take place in the Breast Oncology Institute at the  
45 Sheba Medical Center. The primary objective of the study is to evaluate the efficacy  
46 of the PPT arm vs the MED arm in controlling body mass changes in the patient  
47 population during the intervention period (see summarized study endpoints in **BOX 1**.  
48 For complete SPIRIT checklist and the full protocol see Supplemental material no.1  
49 and 2 respectively)  
50  
51  
52  
53  
54  
55  
56  
57  
58  
59  
60

**BOX 1 – STUDY ENDPOINTS****Primary endpoint**

Body weight changes defined as the net body weight gained/lost in the 6-month intervention period

**Secondary endpoint**

Glycemic response as measured by the area under the glucose curve (AUC) during continuous glucose monitoring (CGM) period pre-intervention and during the intervention.

**Exploratory endpoint**

- Five years Disease free survival (DFS)
- Microbiome and blood metabolites modulation during the diet interventions- tested using the samples taken at profiling and 6month time points.
- Adherence to algorithm-based personalized diets, compared to standard diets advised for weight control – assessed by monthly compliance questionnaire.
- HR+ breast cancer patients' adherence to hormonal treatment
- Translational studies

**Patient and public involvement**

Patients are being involved in the recruitment effort by actively publishing the study recruitment information and sharing their own experience during the study, via social networks and breast cancer survivors' groups. At the end of the study patients will receive an analysis of their glucose responses to the foods that they ate, and get an access to different nutritional tools that will be available to them on a secure website or on a dedicated mobile application. Furthermore, At the end of the study all patients will be given an access to their personal tailored dietary recommendations, built for them by the study team based on their personal data, regardless of their assigned arm during the study.

## Study population

This trial will enroll breast cancer survivors treated with ET and followed at the Breast Oncology Institute at the Sheba Medical Center. Eligibility criteria (inclusion and exclusion criteria) are detailed in **Table 1**. Potentially eligible participants will be identified and recruited to the study by the medical team during regular clinic visits or via database search and phone calls by the clinical study coordinator (SC). Information leaflets and a poster describing the study design and contact information will be available at the institute's reception and waiting area. Additionally, a video explaining the study and its aims will be shown on screens at the institute's reception and waiting area and will be sent to potential participants (<https://youtu.be/kxrqONj3KGM>). All participants will assign informed consent.

**Table 1: Eligibility criteria**

| Inclusion Criteria                                                                                                                                              | Exclusion Criteria                                                                                   |
|-----------------------------------------------------------------------------------------------------------------------------------------------------------------|------------------------------------------------------------------------------------------------------|
| Female patients                                                                                                                                                 | Oral Antibiotics/antifungal use in the previous one month to profiling stage *                       |
| Age $\geq 18$ and $\leq 80$                                                                                                                                     | Known Diagnosis of diabetes or the use of anti-diabetic and/or weight-loss medication                |
| Diagnosis of stage 1-3 HR+ breast cancer, who underwent surgery                                                                                                 | BMI $<18.5$                                                                                          |
| At least 60 days after last non-endocrine oncology treatments (i.e. definitive surgery, radiation or chemotherapy – whichever is last) if these were indicated. | Patients under another diet regime and/or a dietitian consultation/ clinical study                   |
| Adjuvant endocrine therapy (either Tamoxifen or Aromatase inhibitor +/- GNRH agonists) taken for at least 30 days but no more than 24 months.                   | Pregnancy, breast feeding                                                                            |
| Willing to operate a smartphone application                                                                                                                     | HIV carriers, Cushing syndrome, Chronic Kidney Disease, acromegaly, hyperthyroidism, liver cirrhosis |
|                                                                                                                                                                 | Known diagnosis of psychiatric disorders (Schizophrenia, Bipolar Disorder)                           |
|                                                                                                                                                                 | Known diagnosis of IBD (inflammatory bowel diseases)                                                 |
|                                                                                                                                                                 | Patients that underwent Bariatric surgery                                                            |
|                                                                                                                                                                 | Known Alcohol or substance abuse                                                                     |

\*Patients will be offered to join the study at a later point



## Study Procedures and Intervention

### ICF signed (wk -8 to -4)

Eligible participants will be invited to sign an informed consent at the oncologic clinic in Sheba medical center (as shown in **Figure 1**).

### Profiling stage (wk -6 to -3)

Consenting patients will proceed to the profiling stage. During this stage they will undergo the following procedures:

1. Meeting with the SC and completion of questionnaires detailing relevant medical background, nutritional habits and lifestyle activities. Questionnaires will be filled online using the REDCap (27) software (a secure web application for managing online surveys and clinical trials).
2. Participants will provide blood samples after a night fast (12 hours) for complete blood count and blood chemistry, including liver function, lipid profiling, Fasting Plasma Glucose (FPG) and HbA1c. LH, FSH and Estradiol will be measured only in pre-menopausal patients. Participants will provide urine sample for estradiol derivatives for future exploratory analyses.
3. Anthropometrics measurements, including weight, height, waist and hip circumference will be taken at this meeting.
4. Stool sample: Patients will receive a designated stool kit (Genotek OMR200) to collect stool at home. The SC will instruct them how to provide the stool samples and will ask to return this kit during the following week for further processing of the microbiome data. Microbiome sequenced data are essential for the algorithm predictions, thus stool sample is obligatory for participation in the study.
5. Continuous glucose monitoring (CGM) connection: Patients will be connected to a CGM (Abbott Freestyle LibrePro) for 2 weeks. The CGM kit includes a sensor affixed to the back of the arm that continuously monitors glucose levels in the interstitial fluid, translates and records blood glucose levels.

- 1  
2  
3 6. Food diary: Patients will be instructed to download the study dedicated  
4 smartphone application ('personalized nutrition project') for food logging.  
5 They will log in real-time their food intake, physical activities, sleep duration  
6 and quality and special events. During the profiling period, patients will be  
7 asked to follow their regular dietary and lifestyle habits (see examples of  
8 logging activities in **Figure 2A**). All participants will receive a registration code  
9 and their data will be anonymized.  
10  
11
- 12 7. Data collected during the profiling period, including microbiome,  
13 anthropometrics, blood parameters and questionnaires will be analyzed and  
14 used by the PPT algorithm to provide personal dietary recommendations for  
15 each participant.  
16  
17  
18  
19  
20  
21  
22  
23

### 24 Randomization

25  
26  
27 After completion of the profiling stage patients will be randomly assigned to one of  
28 two arms of the study by one programmer from the trial personnel who had no  
29 contact with participants. Approximately 100 subjects will be assigned to each arm  
30 using a blinded randomization algorithm and the following stratification factors: (1)  
31 menopausal status at study entry (post/pre) (2) received/not received chemotherapy  
32 prior to study entry (3) ET type (Tamoxifen/Aromatase inhibitor) (4) Breast Cancer  
33 stage at diagnosis and (5) BMI above/below 27. Notably, we only used the  
34 stratification factors to minimize differences between groups in the allocation process  
35 and did not analyze the data according to the stratification factors. Patients and part  
36 of the study team (oncologists and study coordinators), excluding the dietitian, will be  
37 blinded to the study arm assigned. At the end of intervention, dietary assignment was  
38 revealed, and participants were asked to continue following their respective diets for  
39 6 additional months.  
40  
41  
42  
43  
44  
45  
46  
47  
48  
49  
50

### 51 Recommendation meeting (Day 0)

52  
53  
54 Upon menus construction, patients from both arms will be invited to a  
55 recommendations meeting (hereafter 'day-0') with the dietitians. Patients will receive  
56 general information regarding their menu and will be instructed to consume and log  
57  
58  
59  
60

1  
2  
3 their meals according to it. In order to ensure accurate logging the dietitians will  
4 schedule an online follow up two weeks after 'day-0'. Anthropometrics  
5 measurements, including weight, hip and waist circumference, taken at this meeting  
6 will be used as baseline measurements.  
7  
8  
9

#### 10 Follow up Meetings (Mo +1 up to Mo +5)

11  
12  
13  
14 All patients will participate in monthly follow-up meetings with a dietitian (total of 6  
15 meetings) in order to evaluate their compliance to the dietary recommendations they  
16 received and provide additional advice if needed. Anthropometric measurements  
17 (weight, hip and waist circumference) will be taken at each time point. Furthermore,  
18 patients will be asked to fill a follow-up questionnaire and report any changes within  
19 their lifestyle and treatment. At the beginning of Month 4 of the intervention period,  
20 patients will be offered to be reconnected to CGM for two weeks (optional). At the  
21 monthly meeting before the end of intervention patients will receive a stool kit, to be  
22 returned at the end of intervention meeting.  
23  
24  
25  
26  
27  
28  
29  
30

#### 31 End of intervention (Mo +6)

32  
33  
34 At the end of the 6-month intervention period, patients will be invited to a meeting in  
35 which anthropometrics measurement will be taken, as well as urine, blood and stool  
36 samples. Additionally, participants will be connected to CGM for 2 weeks (mandatory)  
37 for the third time (Figure 1). When patients return CGM they will be unblinded to their  
38 assigned intervention arm by the study dietitian.  
39  
40  
41  
42  
43

#### 44 Long term follow up (Mo +12)

45  
46  
47 At 12-month time point, patients will be invited to a follow up meeting and will be  
48 asked to fill follow-up questionnaires, including food frequency questionnaire.  
49 Anthropometric measurements and a 3-day food diary on the study app will be  
50 recorded. Patients will receive the menu of the other study arm and will be offered to  
51 follow either one of the diets. Long-term clinical follow-up information will be  
52 collected from the electronic medical records twice yearly for treatment adherence,  
53 recurrence and survival calculation purposes, for a period of up to five years post  
54 randomization.  
55  
56  
57  
58  
59  
60

## Menus construction

Before randomization, menus will be constructed for each patient and will be adjusted for patients' caloric target and clinical data. The menus construction flow is presented in **Figure 2B**.

## Meal bank (list)

The menus provided to patients in this study are constructed from a meal bank that we previously generated(26), with over 2,000 meals representative of the Israeli typical diet and with a variety of different food combinations. We divided the meals in the meal bank into four meal types (breakfast, lunch, dinner and snacks) and labeled them according to meal categories (dairy; meat; fish etc.) in order to generate menus according to patients' personal preferences.

## Caloric target calculation

In order to provide the patients with diets that support their energetic needs and meet the recommendations for weight loss in people with overweight or obesity, the daily caloric target for each patient (in both arms) will be calculated as an average between:

1. Estimated Energy Requirements (EER) calculated with the use of the Mifflin equation for Resting Energy Expenditure (REE), using their weight, height, age and gender, and multiplied by Physical Activity (PA) factor, based on the level of PA that the person performs on a regular basis (28).
2. Energy expenditure assessed by Basal Metabolic Rate (BMR) value measured by body composition analyzer (Tanita). The result from this equation will be divided by 0.7 (as REE represents ~70% of total energy expenditure).
3. Average daily caloric intake obtained from the patients' dietary records during the profiling stage, to account for the subject's dietary habits prior to the intervention.

1  
2  
3 Furthermore, for individuals with BMI>25 a total of 500Kcal will be reduced from their  
4 calculated caloric target, but not less than 1200 calories/day, to allow weight loss  
5 according to common recommendations for weight loss (29,30).  
6  
7  
8

## 9 **Diets**

### 10 *Mediterranean-style (MED) diet*

11  
12  
13 In this arm we included meals that were scored by four external dietitians according  
14 to the Mediterranean-style dietary recommendations. Meals were binary scored as  
15 recommended (=1) or not recommended (=0) and we applied scores 1 to 5 to all  
16 meals, depending on how many dietitians marked the meal as recommended or not.  
17  
18 The diet is based on recommended foods such as vegetables, fruits, legumes, whole  
19 grain products, unsaturated fats such as olive oil and nuts, fish, poultry and low-fat  
20 dairy products. Consumption of red meat, high fat dairy products, processed foods  
21 and sweet pastries, was discouraged as part of the diet. Additionally, menus in this  
22 arm were designed with the following target for daily macronutrient composition: 45-  
23 65% of calories from carbohydrates; 15-20% from protein; and 20-35% from fat, with  
24 up to 10% from saturated fat. Menus include only meals that received scores 1 and 2.  
25  
26 Participants will be encouraged to consult with the dietitian regarding meals that may  
27 not appear in the constructed menu.  
28  
29  
30  
31  
32  
33  
34  
35  
36  
37  
38  
39

### 40 *Personalized Postprandial-glucose-response Targeting (PPT) diet*

41  
42  
43 In this arm, dietary recommendations will be based on the algorithm predictions of  
44 the postprandial glucose responses(25), shown to improve glycemic control and  
45 metabolic health in healthy individuals or in individuals with prediabetes and  
46 diabetes(26,31). Notably, these interventions were not caloric restricted as in the  
47 current study. Among the features used to predict PPGR to meals were  
48 anthropometrics, blood tests (FPG, HbA1c% and Hemoglobin), lifestyle features  
49 derived from questionnaires, microbiome (abundances of species estimated by  
50 MetaPhlan2 and meal features (macro- and micronutrient composition) were used  
51 (see Supplementary table 1 for the full list). Since no events around the meal were  
52  
53  
54  
55  
56  
57  
58  
59  
60

1  
2  
3 used for prediction, trained predictor could predict response for any profiled  
4 participant to any given meal.  
5  
6  
7

8 All logged meals will be scored from 1-5 based on a unique scoring method that we  
9 developed and tested in previous studies, and study participants will be asked to  
10 consume only meals with score 1 or 2. Importantly, the PPT diet, by definition, was  
11 not aimed to have a predetermined macronutrient distribution, In contrast to the  
12 Med-diet  
13  
14  
15  
16

### 17 18 19 20 21 **Adherence to the study recommendations** 22

23 The adherence to the prescribed diets during the intervention will be evaluated by the  
24 dietitian by a close monitoring of the patients' self-recorded dietary intake in the  
25 logging application, as well as by monthly electronic follow-up questionnaires that  
26 participants will be asked to fill out. In order to encourage dietary adherence and self-  
27 monitoring, we will generate a bi-weekly semi-automatic feedback reports that will  
28 include composite grades on a scale of 0-100 (from worse to best) for diet  
29 composition, calorie intake and dietary fiber intake separately, for the entire two-  
30 week period (**Figure 2C**).  
31  
32  
33  
34  
35  
36  
37

- 38  
39 • *MED-diet composition grade*: indicates how well the participant sticks to the  
40 dietary recommendations based on the MED approach including Carbohydrate  
41 (as % of daily caloric intake), fats in general (as % of daily caloric intake) and  
42 specifically saturated fat intake below and above 10% of caloric intake. Dietary  
43 fiber intake per each of 1000 kCal per day will be also calculated as part of the  
44 score.  
45  
46
- 47 • *PPT-diet composition grade*: indicates how well the participant sticks to  
48 predictor-based meal scores. Each meal score was assigned with a grade as  
49 follows: meal score 1=grade 100; meal score 2=80; meal score 3=50; meal  
50 score 4=25; meal score 5=0. The grades are averaged calorie-wise (with food  
51 energy trimmed to be within (100,500) kcal interval)-  $\sum \text{kcal}(i) \cdot \text{grade}(i)$ . For  
52 example, if a participant eats three meals: 600 kcal of meal score 2, 1000 kcal  
53  
54  
55  
56  
57  
58  
59  
60

of meal score 5 and 80 kcal of meal score 1, feedback grade would be:  
 $(500*80+500*0+100*100) / (500+500+100) = 45$ . If too few (100 by default) calories are logged (overall), we did not compute a score.

- *Calories grade*: indicates how well the participant sticks to the prescribed caloric target. When caloric intake deviates within 15% of caloric target (CT) the applied grade is 100; when caloric intake deviation exceeds 60% of CT the applied grade is 0; when caloric intake deviation is between 15% to 60%, a linear penalty is applied to the grade depending on the deviation.
- *Dietary fiber grade*: indicates if participants consumed the recommended amount of dietary fibers (set to 14 gram for every 1000 kcal/day for both arms) from the diet at the referred time. When fiber intake in grams per day reaches the recommended amount, or higher the applied grade is 100 and when it is below the recommended amount a linear penalty is applied to the grade.

In addition to grades, feedback reports also included a list of recommended meals and non-recommended meals (by meal score) to highlight the best and worst meals consumed on that time period (as logged by the participant). The best and worst meals lists will be generated systematically and be reviewed by a dietitian from the study team.

## STATISTICAL CONSIDERATION

### Sample size determination

To estimate the required sample size we performed power analysis, using an unpaired t-test assuming normal distribution of the primary outcome (weight change), estimating the effect size based on the results of different studies describing controlled diet intervention aimed at weight control. Our goal is to detect a difference of at least 2 kg in net weight loss/gain (kg) between control group and experimental group. Based on the study of Shai et al. (32), the standard deviation of weight loss is 4.2 and the projected sample size with alpha of 0.05 and power of 0.8, with an estimated dropout rate of 10%, is 107 people for each arm totaling 214 individuals.

### **Primary, secondary and exploratory endpoint analysis**

All statistical analyses will be performed using Python 2.7. Continuous variables will be presented as mean±SD and dichotomous/categorical variables as proportions. The normality of the distribution of continuous variables will be tested by the Kolmogorov-Smirnov test. If normality will be rejected, non-parametric tests will be used. To test the association between continuous variables with normal distribution, the Pearson correlation coefficient will be performed and to test associations between continuous variables which do not distribute normally or for ordinal variables, the Spearman correlation coefficient will be used. To compare parameters for continuous variables in two time points, the paired-samples t-test will be performed (or Wilcoxon test for non-normally distributed variables), in dichotomous/categorical variables the McNemar test will be performed. To compare continuous variables in a number of time points ANOVA with repeated measures will be used. For comparison of dichotomous/categorical variables in the number of time points the Cochran's Q test will be performed. P values < 0.05 will be considered significant.

### **Data Acquisition, Storage and Analysis**

All samples will be stored at the Breast Cancer Translational Research laboratory at Sheba Medical Center. The blood and urine samples will be stored at -80°C and bacterial DNA samples will be stored at -20°C. The samples will be encoded with no identifying information. Identifying details and codes will be kept in an encrypted file stored at Sheba medical center. Encoded stool samples will be transferred to the Weizmann Institute of science. There, samples will be processed for bacterial DNA processing. All clinical data will be coded. Data will be transferred using the REDcap server and stored on Weizmann servers behind a protected firewall and be accessible only to the study team. Samples will be stored for up to 10 years. All future use of stool and blood samples will be subjected to IRB approval.



## Ethics and dissemination

The study has been approved by the Sheba medical center Institutional Review Board (IRB 5725-18) and the Weizmann institute of science Institutional Review Board. The findings of this study will be published in a peer reviewed publication. De-identified individual participant data and applicable supporting clinical trial documents will be available upon request for 12 months after publication.

## CURRENT STATUS

Enrollment and recruitment initiated on July 2019. To date (February 2022), 120 participants have been recruited, out of them 60 completed the 6-month intervention period including 38 participants who completed the 12-month time point.

## DISCUSSION

Dietary interventions are the first-line treatment for weight management within breast cancer survivors and have beneficial results. Yet, the ability to maintain these outcomes is questionable and require further research(11,33,34). In this trial, we aim to assess the effect of a PPT diet on weight maintenance as compared to Mediterranean-style diet in early stage HR+ breast cancer patients, taking ET.

This study has several strengths and limitations. Advantages of this study design include a comprehensive profiling of each participant, which allow us to better understand participants' metabolic baseline and to assess the effect of the dietary changes. Additionally, the continuous food logging by the study patients using a designated smartphone app can provide us with insights on the patients' compliance to the dietary recommendations in both arms. However, this may limit the study population to individuals who are able to work with smartphone application on a daily basis. Furthermore, the study participants are being closely followed by a dietitian from the study team who monitor their food intake and meet them on a monthly basis in order to increase compliance during the first 6-months. However, on the long term, without intensive monitoring, the feasibility of the PPT diet and the ability to follow the diet recommendations should be investigated. Notably, Ben-Yacov et al. (26), reported that prediabetes individuals following PPT diet were able to maintain the

1  
2  
3 results during 12-month follow up as compared to those who followed the MED diet.  
4  
5 Additionally, as a novel tool, the algorithm is not available for general use which makes  
6  
7 it difficult to replicate the intervention. Nevertheless, we do publish the full list of  
8  
9 features we use to generate the menus, based on personal and microbiome data  
10  
11 (Supplementary table 1).  
12

13  
14 Lastly, microbiome composition and pathways were recently associated with weight  
15  
16 changes and metabolic health parameters, as well as with risk for breast cancer  
17  
18 diagnosis and recurrence (35). This may allow us to further explore whether gut  
19  
20 microbiome composition and pathways have a predictive role in weight management,  
21  
22 metabolic health parameters, glycemic control and even disease recurrence on the  
23  
24 next 5 years after the intervention within breast cancer patients, although for disease  
25  
26 recurrence differences the sample size may not be large enough.

27  
28 Taken together, our rich dataset including deep phenotyping of each patient may  
29  
30 allow us to deeply investigate associations between clinical and Omic data to DFS in  
31  
32 early stage HR+ breast cancer patients and may pave the way to larger studies.

### 33 **FUNDING**

34  
35  
36 This work is supported by Seerave foundation (grant number 713067). This funding  
37  
38 source had no role in the design of this study and will not have any role during its  
39  
40 execution, analyses, interpretation of the data, or decision to submit results.  
41  
42

### 43 **AUTHOR CONTRIBUTIONS**

44  
45 MR, MD and AW conceived the study and designed the intervention. MR and MD  
46  
47 wrote the manuscript. AG is responsible for directing the computational aspects of the  
48  
49 study. DK is responsible for the feedback reports and summary reports being sent to  
50  
51 participants. MBG, DMS and YV coordinate participants' recruitment and  
52  
53 management throughout the intervention and follow-up. AW developed the protocols  
54  
55 and directed and performed the microbiome sample sequencing with the help of MLP.  
56  
57 ES and ENG conceived the study, designed the intervention and wrote the manuscript.  
58  
59 All authors read and approved the final manuscript.  
60

## COMPETING INTEREST STATEMENT

ENG reports Honoraria and Consulting fees from Pfizer, Novartis, Roche Eli-lilly AstraZeneca. ES is paid scientific consultants for DayTwo Inc. No pharmaceutical manufacturers or other companies from the industry contributed to the planning, design, or conduct of the trial. No other potential competing interest are relevant to this article were reported.

For peer review only

**BIBLIOGRAPHY**

1. Vance V, Mourtzakis M, McCargar L, Hanning R. Weight gain in breast cancer survivors: prevalence, pattern and health consequences. *Obes Rev*. 2011 Apr;12(4):282–294.
2. Goodwin PJ, Ennis M, Pritchard KI, McCready D, Koo J, Sidlofsky S, et al. Adjuvant treatment and onset of menopause predict weight gain after breast cancer diagnosis. *J Clin Oncol*. 1999 Jan;17(1):120–129.
3. Ginzac A, Thivat É, Mouret-Reynier M-A, Dubray-Longeras P, Van Praagh I, Passildas J, et al. Weight evolution during endocrine therapy for breast cancer in postmenopausal patients: effect of initial fat mass percentage and previous adjuvant treatments. *Clin Breast Cancer*. 2018 Oct;18(5):e1093–e1102.
4. Raghavendra A, Sinha AK, Valle-Goffin J, Shen Y, Tripathy D, Barcenas CH. Determinants of Weight Gain During Adjuvant Endocrine Therapy and Association of Such Weight Gain With Recurrence in Long-term Breast Cancer Survivors. *Clin Breast Cancer*. 2018;18(1):e7–e13.
5. White AJ, Nichols HB, Bradshaw PT, Sandler DP. Overall and central adiposity and breast cancer risk in the Sister Study. *Cancer*. 2015 Oct 15;121(20):3700–3708.
6. Nyrop KA, Williams GR, Muss HB, Shachar SS. Weight gain during adjuvant endocrine treatment for early-stage breast cancer: What is the evidence? *Breast Cancer Res Treat*. 2016 Jun 24;158(2):203–217.
7. Zhu Q-L, Xu W-H, Tao M-H. Biomarkers of the metabolic syndrome and breast cancer prognosis. *Cancers (Basel)*. 2010 Apr 28;2(2):721–739.
8. Franzoi MA, Agostinetti E, Perachino M, Del Mastro L, de Azambuja E, Vaz-Luis I, et al. Evidence-based approaches for the management of side-effects of adjuvant endocrine therapy in patients with breast cancer. *Lancet Oncol*. 2021 Jul;22(7):e303–e313.
9. Caan BJ, Emond JA, Natarajan L, Castillo A, Gunderson EP, Habel L, et al. Post-diagnosis weight gain and breast cancer recurrence in women with early stage breast cancer. *Breast Cancer Res Treat*. 2006 Sep;99(1):47–57.
10. Playdon MC, Bracken MB, Sanft TB, Ligibel JA, Harrigan M, Irwin ML. Weight Gain After Breast Cancer Diagnosis and All-Cause Mortality: Systematic Review and Meta-Analysis. *J Natl Cancer Inst*. 2015 Dec;107(12):djv275.
11. Shaikh H, Bradhurst P, Ma LX, Tan SYC, Egger SJ, Vardy JL. Body weight management in overweight and obese breast cancer survivors. *Cochrane Database Syst Rev*. 2020 Dec 11;12:CD012110.

12. Abu-Saad K, Endevelt R, Goldsmith R, Shimony T, Nitsan L, Shahar DR, et al. Adaptation and predictive utility of a Mediterranean diet screener score. *Clin Nutr*. 2019 Dec;38(6):2928–2935.
13. Negrati M, Razza C, Biasini C, Di Nunzio C, Vancini A, Dall’Asta M, et al. Mediterranean Diet Affects Blood Circulating Lipid-Soluble Micronutrients and Inflammatory Biomarkers in a Cohort of Breast Cancer Survivors: Results from the SETA Study. *Nutrients*. 2021 Sep 30;13(10).
14. Di Maso M, Dal Maso L, Augustin LSA, Puppo A, Falcini F, Stocco C, et al. Adherence to the Mediterranean Diet and Mortality after Breast Cancer. *Nutrients*. 2020 Nov 27;12(12).
15. Braakhuis A, Campion P, Bishop K. The effects of dietary nutrition education on weight and health biomarkers in breast cancer survivors. *Med Sci (Basel)*. 2017 Jun 2;5(2).
16. Plottel CS, Blaser MJ. Microbiome and malignancy. *Cell Host Microbe*. 2011 Oct 20;10(4):324–335.
17. Erdman SE, Poutahidis T. Gut bacteria and cancer. *Biochim Biophys Acta*. 2015 Aug;1856(1):86–90.
18. Vrieze A, Holleman F, Zoetendal EG, de Vos WM, Hoekstra JBL, Nieuwdorp M. The environment within: how gut microbiota may influence metabolism and body composition. *Diabetologia*. 2010 Apr;53(4):606–613.
19. Shulzhenko N, Morgun A, Hsiao W, Battle M, Yao M, Gavrilova O, et al. Crosstalk between B lymphocytes, microbiota and the intestinal epithelium governs immunity versus metabolism in the gut. *Nat Med*. 2011 Nov 20;17(12):1585–1593.
20. Shapira I, Sultan K, Lee A, Taioli E. Evolving concepts: how diet and the intestinal microbiome act as modulators of breast malignancy. *ISRN Oncol*. 2013 Sep 25;2013:693920.
21. Goedert JJ, Jones G, Hua X, Xu X, Yu G, Flores R, et al. Investigation of the association between the fecal microbiota and breast cancer in postmenopausal women: a population-based case-control pilot study. *J Natl Cancer Inst*. 2015 Aug;107(8).
22. Menni C, Jackson MA, Pallister T, Steves CJ, Spector TD, Valdes AM. Gut microbiome diversity and high-fibre intake are related to lower long-term weight gain. *Int J Obes*. 2017 Jul;41(7):1099–1105.
23. Thaiss CA, Itav S, Rothschild D, Meijer MT, Levy M, Moresi C, et al. Persistent microbiome alterations modulate the rate of post-dieting weight regain. *Nature*. 2016 Dec 22;540(7634):544–551.

- 1
  - 2
  - 3
  - 4
  - 5
  - 6
  - 7
  - 8
  - 9
  - 10
  - 11
  - 12
  - 13
  - 14
  - 15
  - 16
  - 17
  - 18
  - 19
  - 20
  - 21
  - 22
  - 23
  - 24
  - 25
  - 26
  - 27
  - 28
  - 29
  - 30
  - 31
  - 32
  - 33
  - 34
  - 35
  - 36
  - 37
  - 38
  - 39
  - 40
  - 41
  - 42
  - 43
  - 44
  - 45
  - 46
  - 47
  - 48
  - 49
  - 50
  - 51
  - 52
  - 53
  - 54
  - 55
  - 56
  - 57
  - 58
  - 59
  - 60
24. Key TJ, Appleby PN, Reeves GK, Roddam A, Dorgan JF, Longcope C, et al. Body mass index, serum sex hormones, and breast cancer risk in postmenopausal women. *J Natl Cancer Inst.* 2003 Aug 20;95(16):1218–1226.
25. Zeevi D, Korem T, Zmora N, Israeli D, Rothschild D, Weinberger A, et al. Personalized nutrition by prediction of glycemic responses. *Cell.* 2015 Nov 19;163(5):1079–1094.
26. Ben-Yacov O, Godneva A, Rein M, Shilo S, Kolobkov D, Koren N, et al. Personalized Postprandial Glucose Response-Targeting Diet Versus Mediterranean Diet for Glycemic Control in Prediabetes. *Diabetes Care.* 2021 Sep;44(9):1980–1991.
27. Harris PA, Taylor R, Minor BL, Elliott V, Fernandez M, O’Neal L, et al. The REDCap consortium: Building an international community of software platform partners. *J Biomed Inform.* 2019 Jul;95:103208.
28. Mifflin MD, St Jeor ST, Hill LA, Scott BJ, Daugherty SA, Koh YO. A new predictive equation for resting energy expenditure in healthy individuals. *Am J Clin Nutr.* 1990 Feb;51(2):241–247.
29. Jensen MD, Ryan DH, Apovian CM, Ard JD, Comuzzie AG, Donato KA, et al. 2013 AHA/ACC/TOS guideline for the management of overweight and obesity in adults: a report of the American College of Cardiology/American Heart Association Task Force on Practice Guidelines and The Obesity Society. *J Am Coll Cardiol.* 2014 Jul 1;63(25 Pt B):2985–3023.
30. Limon-Miro AT, Lopez-Teros V, Astiazaran-Garcia H. Dietary guidelines for breast cancer patients: A critical review. *Adv Nutr.* 2017 Jul 14;8(4):613–623.
31. Rein M, Ben-Yacov O, Godneva A, Shilo S, Zmora N, Kolobkov D, et al. Effects of personalized diets by prediction of glycemic responses on glycemic control and metabolic health in newly diagnosed T2DM: a randomized dietary intervention pilot trial. *BMC Med.* 2022 Feb 9;20(1):56.
32. Shai I, Schwarzfuchs D, Henkin Y, Shahar DR, Witkow S, Greenberg I, et al. Weight loss with a low-carbohydrate, Mediterranean, or low-fat diet. *N Engl J Med.* 2008 Jul 17;359(3):229–241.
33. Picon-Ruiz M, Morata-Tarifa C, Valle-Goffin JJ, Friedman ER, Slingerland JM. Obesity and adverse breast cancer risk and outcome: Mechanistic insights and strategies for intervention. *CA Cancer J Clin.* 2017 Sep;67(5):378–397.
34. Anbari AB, Deroche CB, Armer JM. Body mass index trends and quality of life from breast cancer diagnosis through seven years’ survivorship. *World J Clin Oncol.* 2019 Dec 24;10(12):382–390.
35. Uzan-Yulzari A, Morr M, Tareef-Nabwani H, Ziv O, Magid-Neriya D, Armoni R, et al. The intestinal microbiome, weight, and metabolic changes in women

1  
2  
3 treated by adjuvant chemotherapy for breast and gynecological malignancies.  
4  
5 BMC Med. 2020 Oct 21;18(1):281.  
6  
7  
8  
9  
10  
11  
12  
13  
14  
15  
16  
17  
18  
19  
20  
21  
22  
23  
24  
25  
26  
27  
28  
29  
30  
31  
32  
33  
34  
35  
36  
37  
38  
39  
40  
41  
42  
43  
44  
45  
46  
47  
48  
49  
50  
51  
52  
53  
54  
55  
56  
57  
58  
59  
60

For peer review only

1  
2  
3 **FIGURES LEGEND**  
4

5 **Figure 1. An illustration of the study design**  
6  
7  
8

9  
10 **Figure 2. Study application and menus construction. (A)** The food logging application,  
11 examples of logging activities and information available on the application. **(B)** Menus  
12 construction flow. **(C)** An example of the bi-weekly feedback report that will be sent to  
13 participants.  
14  
15  
16  
17  
18  
19  
20  
21  
22  
23  
24  
25  
26  
27  
28  
29  
30  
31  
32  
33  
34  
35  
36  
37  
38  
39  
40  
41  
42  
43  
44  
45  
46  
47  
48  
49  
50  
51  
52  
53  
54  
55  
56  
57  
58  
59  
60

For peer review only





Figure 1. An illustration of the study design

254x190mm (96 x 96 DPI)

A

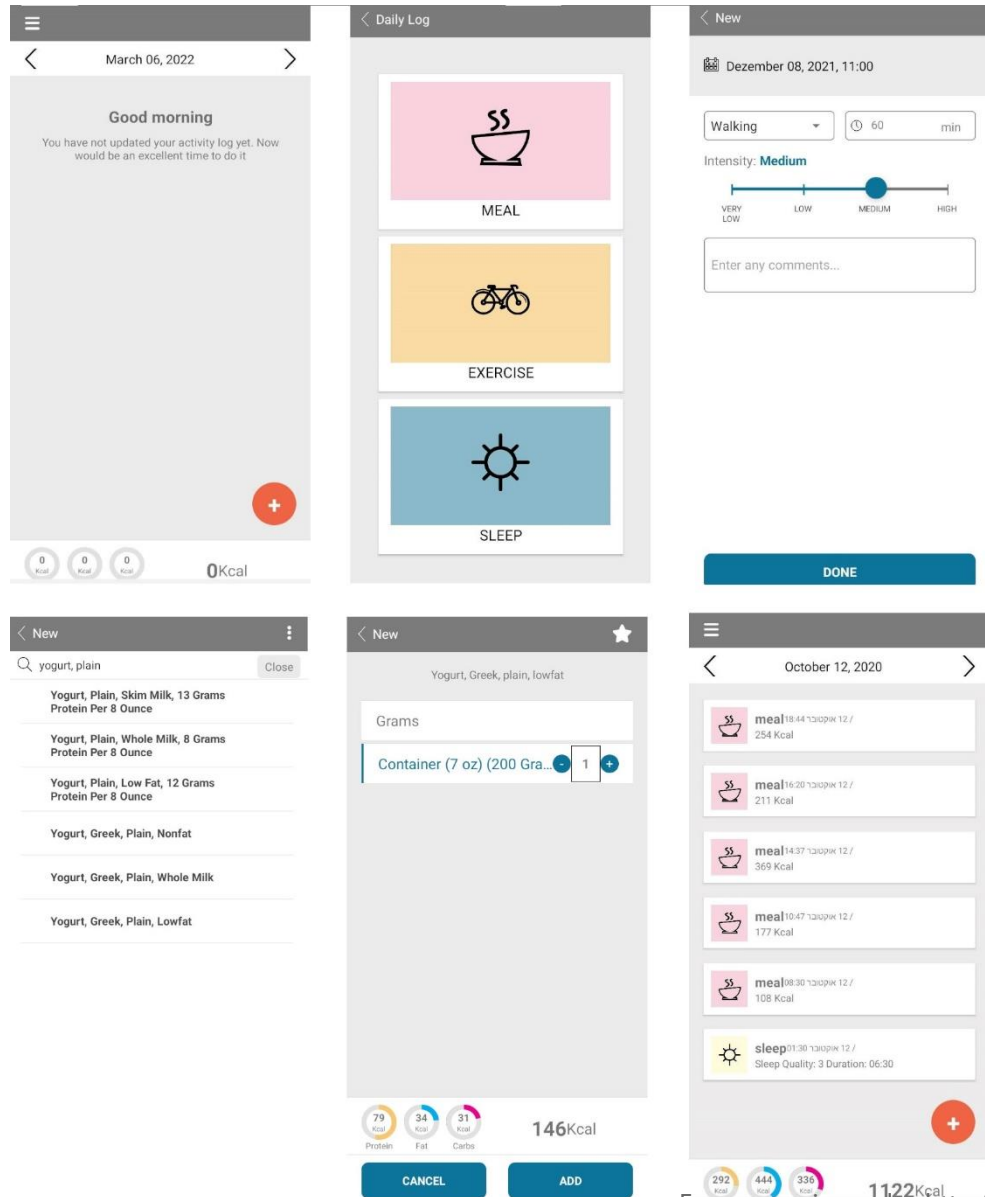

BMJ Open

B

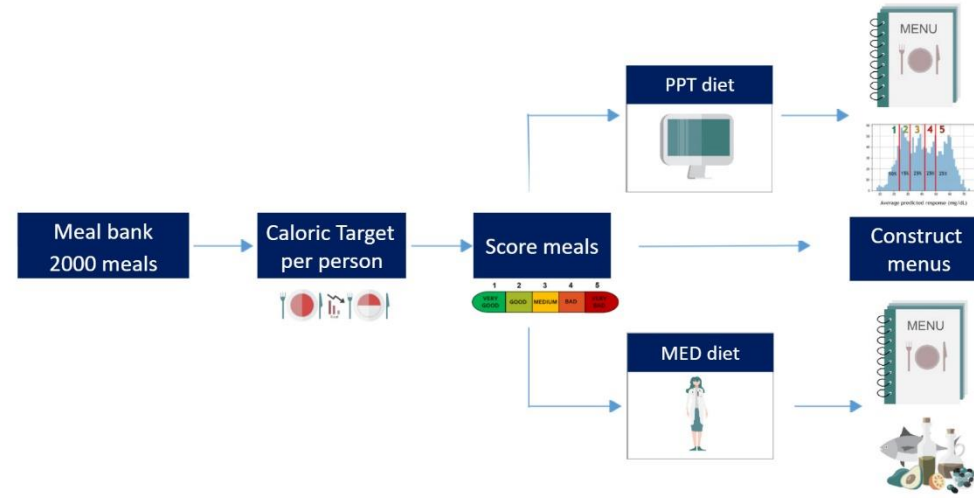

C

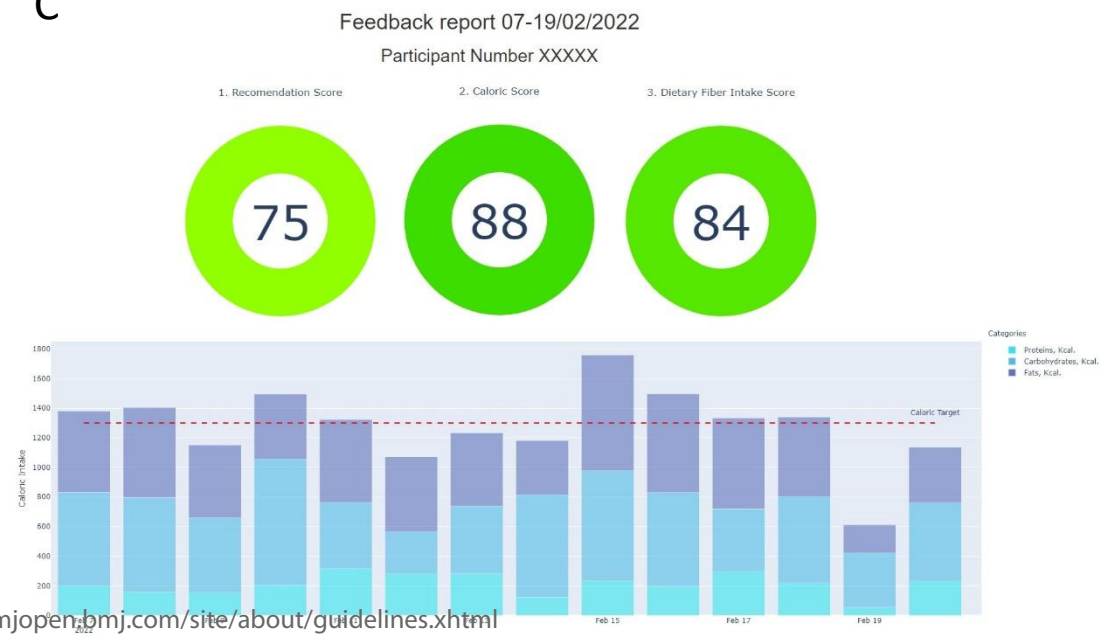

---

The Breast Cancer Personalized Nutrition study (BREACPNT):

*A phase 2 single-blinded randomized study of algorithm-based personalized nutrition intervention compared to standard diet intervention in patients treated with endocrine therapy for early stage, hormone receptor positive breast cancer*

---

Study Protocol

**SMC -5725-18**

February 7, 2019

Version 1.3

Study Principal Investigator:

Dr. Einav Gal-Yam, Breast Oncology Unit, Sheba Medical Center

Study Co-Investigators:

Prof. Eran Segal, Weizmann Institute of Science

Dr. Maya Dadiani, Cancer Research Center, Sheba Medical Center

Dr. Adina Weinberger, Weizmann Institute of Science

Prof. Bella Kaufman, Breast Oncology Unit, Sheba Medical Center

Dr. Keren Levanon, Breast Oncology Unit, Sheba Medical Center

Dr. Rinat Bernstein, Breast Oncology Unit, Sheba Medical Center

Dr. Amit Itay, Breast Oncology Unit, Sheba Medical Center

Dr. Tali Shapira-Rotenberg, Breast Oncology Unit, Sheba Medical Center

Dr. Ofer Globus, Breast Oncology Unit, Sheba Medical Center

## **Table of Contents**

|    |                                                                   |           |
|----|-------------------------------------------------------------------|-----------|
| 1  |                                                                   |           |
| 2  |                                                                   |           |
| 3  |                                                                   |           |
| 4  |                                                                   |           |
| 5  |                                                                   |           |
| 6  | <b>1. PURPOSE.....</b>                                            | <b>3</b>  |
| 7  | <b>2. BACKGROUND .....</b>                                        | <b>3</b>  |
| 8  | <b>3. HYPOTHESIS OBJECTIVES AND ENDPOINTS .....</b>               | <b>5</b>  |
| 9  | <b>4. STUDY DESIGN.....</b>                                       | <b>6</b>  |
| 10 | <b>5. DATA ACQUISITION, STORAGE AND ANALYSIS .....</b>            | <b>12</b> |
| 11 | <b>6. SAFETY ENDPOINTS.....</b>                                   | <b>12</b> |
| 12 | <b>7. STATISTICAL CONSIDERATIONS .....</b>                        | <b>13</b> |
| 13 | <b>8. POSSIBLE BENEFITS .....</b>                                 | <b>13</b> |
| 14 | <b>9. POSSIBLE RISKS AND ANALYSIS OF RISK/BENEFIT RATIO .....</b> | <b>14</b> |
| 15 | <b>10. RISK MANAGEMENT PROCEDURES .....</b>                       | <b>14</b> |
| 16 | <b>11. SUBJECT PAYMENT/COSTS.....</b>                             | <b>15</b> |
| 17 | <b>12. END OF STUDY DEFINITION .....</b>                          | <b>15</b> |
| 18 | <b>13. CONSENT PROCEDURES.....</b>                                | <b>15</b> |
| 19 | <b>14. PRIVACY.....</b>                                           | <b>15</b> |
| 20 | <b>15. DATA SECURITY.....</b>                                     | <b>15</b> |
| 21 | <b>16. STUDY/INTERVENTION DISCONTINUATION.....</b>                | <b>16</b> |
| 22 | <b>17. MONITORING.....</b>                                        | <b>16</b> |
| 23 | <b>18. RECORD RETENTION .....</b>                                 | <b>17</b> |
| 24 | <b>19. PUBLICATION.....</b>                                       | <b>17</b> |
| 25 | <b>20. FACILITIES AND PERSONNEL.....</b>                          | <b>17</b> |
| 26 | <b>BIBLIOGRAPHY .....</b>                                         | <b>18</b> |
| 27 | <b>APPENDIX 1: SAMPLES COLLECTION, STORAGE AND ANALYSIS.....</b>  | <b>21</b> |
| 28 | <b>APPENDIX 2: SCHEDULE OF ACTIVITIES .....</b>                   | <b>22</b> |
| 29 |                                                                   |           |
| 30 |                                                                   |           |
| 31 |                                                                   |           |
| 32 |                                                                   |           |
| 33 |                                                                   |           |
| 34 |                                                                   |           |
| 35 |                                                                   |           |
| 36 |                                                                   |           |
| 37 |                                                                   |           |
| 38 |                                                                   |           |
| 39 |                                                                   |           |
| 40 |                                                                   |           |
| 41 |                                                                   |           |
| 42 |                                                                   |           |
| 43 |                                                                   |           |
| 44 |                                                                   |           |
| 45 |                                                                   |           |
| 46 |                                                                   |           |
| 47 |                                                                   |           |
| 48 |                                                                   |           |
| 49 |                                                                   |           |
| 50 |                                                                   |           |
| 51 |                                                                   |           |
| 52 |                                                                   |           |
| 53 |                                                                   |           |
| 54 |                                                                   |           |
| 55 |                                                                   |           |
| 56 |                                                                   |           |
| 57 |                                                                   |           |
| 58 |                                                                   |           |
| 59 |                                                                   |           |
| 60 |                                                                   |           |

## 1. Purpose

The Breast Cancer Personalized Nutrition (BREACPNT) study will evaluate the effect of a microbiome based personalized diet intervention on control of weight gain, glycemic response, disease outcome and various biomarkers in hormone receptor early breast cancer patients receiving adjuvant endocrine treatment.

## 2. Background

Weight gain is a common incident in breast cancer survivors [1]. As many as 50–96% of women experience weight gain during treatment. Weight gain in breast cancer survivors is complex and influenced by many factors such as tumor type, socio-demographic characteristics, and menopausal status [2,3]. Most breast cancer patients (~75%) are diagnosed with hormone receptor-positive (HR+) tumors and receive endocrine treatment for a period of at least 5 years. Endocrine treatment was identified as a risk factor for weight gain in several studies [2]. Weight gain during endocrine therapy was highest in women who were premenopausal or had previous chemotherapy [4].

Weight gain may decrease adherence to long-term hormonal therapy and increase risk for metabolic syndrome and cardiac disease. Importantly, post-diagnosis weight gain has been implicated as a risk factor in breast cancer recurrence and survival. Hence, weight management for breast cancer survivors is important for increasing adherence to therapy and lowering recurrence risk [5].

The essential role of the gut microbiota in modulating immune and metabolic functions in health and disease is increasingly recognized. Dysbiosis, a disruption in the balance of gut bacterial communities, is associated with many conditions [6]. The entire bacteria population in the digestive tract (microbiome) consists of ~1,000 species with a genetic repertoire of ~3 million different genes. The homeostasis of intestinal microbiota can be influenced by internal factors, such as genetic, age-related and hormonal, as well as by external factors, such as nutrition, stress, lifestyle and antibiotics [7]. The microbiome is directly affected by our diet and directly affect the body's response to food [8,9]. Particularly in breast cancer (BC), diet plays an important role in creating a microbiome

1  
2  
3 environment involved in estrogens metabolism [10]. High systemic estrogen levels  
4 contribute to breast cancer risk in postmenopausal women. Estrogen levels in the blood are  
5 regulated in part via enterohepatic recirculation, involving bacterial enzymatic pathways  
6 and deconjugation[11]. Indeed, profiling gut microbiota in postmenopausal breast cancer  
7 patients revealed altered composition and estrogen-independent low diversity of their gut  
8 microbiota compared to healthy controls [12]. Thus, the gut microbial community may  
9 affect estrogen-related breast cancer [13].

10  
11 A recent study linked the gut microbiome diversity to weight gain [14] and microbiome  
12 alterations were found to contribute to post-dieting weight regain [15]. In addition it was  
13 found that the increase in breast cancer risk with increasing BMI among postmenopausal  
14 women is associated with an increase in estrogens, particularly bioavailable estradiol [16].  
15 The Personalized Nutrition Project, conducted at Eran Segal's group in the Weizmann  
16 Institute of Science, recently showed in an unprecedented scale of 800 people that  
17 individuals vary greatly in their glycemic response to the same food [17]. Most importantly,  
18 it emphasized the involvement of functional microbial pathways and bacterial taxa in host  
19 glucose metabolism. This unique dataset yielded an algorithm capable of accurately  
20 predicting personalized postprandial glycemic response (PPGR) to arbitrary meals. The  
21 algorithm's predictions are based on many personal measurements, including blood tests,  
22 personal lifestyle and gut bacteria profiles.

23  
24 Continuing studies demonstrate that short-term dietary interventions change the  
25 microbiome and are beneficial to the host in maintaining glucose levels. Moreover, Low  
26 glycemic index (GI) diets may be important in weight management [18]. In a small-scale  
27 pilot study using this algorithm, personally tailoring dietary interventions to healthy and  
28 pre-diabetic people, showed a significantly improved PPGRs accompanied by consistent  
29 alterations to the gut microbiota (personal communication) . These results suggest that  
30 individually tailored dietary interventions help maintain normal blood glucose levels and  
31 influence microbiome diversity, which, in turn, can control weight changes.  
32  
33  
34  
35  
36  
37  
38  
39  
40  
41  
42  
43  
44  
45  
46  
47  
48  
49  
50  
51  
52  
53  
54  
55  
56  
57

### 3. Hypothesis Objectives and Endpoints

#### Study Hypothesis

Algorithm based personalized diet will be superior to standard low fat diet for controlling weight gain and glycemic response in breast cancer patients treated with endocrine therapy.

#### *Primary Objective*

To evaluate the efficacy of a personalized diet compared to a standard low fat diet to control body mass as measured by changes in body mass.

Endpoint: Body weight changes will be defined as the net body weight gained/lost in the 6 months' intervention period.

#### *Secondary Objective*

1. To evaluate the efficacy of the personalized diet compared to a standard low fat diet to control glycemic response.

*Endpoint:* glycemic response control measured by the area under the glucose curve (AUC) during continuous glucose monitoring (CGM) period.

#### *Exploratory objective*

1. Evaluate disease outcomes as measured by disease free survival, Breast cancer recurrence in study subjects. Endpoint: 5 years Disease free survival (DFS), 5 years Breast cancer specific recurrence.
2. To investigate microbiome composition and modulation during the diet intervention period and assess if there are differences in modulations between the personalized diets as compared to the standard diet.
3. Investigate the mutual effects of gut microbiome and blood metabolites during the diet intervention period and search for possible biomarkers for dietary treatment efficacy.
4. Investigate inflammation parameters and immune profiles of patients (lymphocytes, T-cell receptor repertoire, antibodies profiling using phage display libraries) of HR positive patients undergoing intervention and their correlations to microbiome modulations.
5. Test whether patients have better compliance and adherence to algorithm-based personalized diets, compared to standard diets advised for weight control. The compliance to the diets will be measured by: Compliance questionnaire, 3-day dietary log, Number of study meetings attended.
6. Test whether HR-positive breast cancer patients have better adherence to hormonal treatment following weight-control diets. This compliance will be tested for 5 years post treatment.



## 4. Study Design

This is a phase 2 randomized trial in hormone receptor positive breast cancer patients receiving adjuvant endocrine therapy. Figure 1 illustrates the study schedule.

200 HR+ breast cancer patients, eligible for adjuvant endocrine therapy will be recruited to the study. Upon recruitment, subjects will provide a stool sample for microbiome analysis and will undergo continuous glucose monitoring for 2 weeks. Thereafter, patients will be randomly assigned in a 1:1 ratio to receive a personalized diet recommendation or a standard low-fat diet for 6 months. The algorithm is based on patients' microbiome analyses and glucose monitoring results. Patients will be monitored by continuous glucose monitoring (CGM) at least 2 times during the 6 months' intervention period. At the end of the 6 months' period patients will undergo a second course of CGM for 2 weeks and provide a second stool sample for microbiome analysis. Patient clinical records will be followed 2-3 times yearly for 5 years for DFS and BC recurrence.

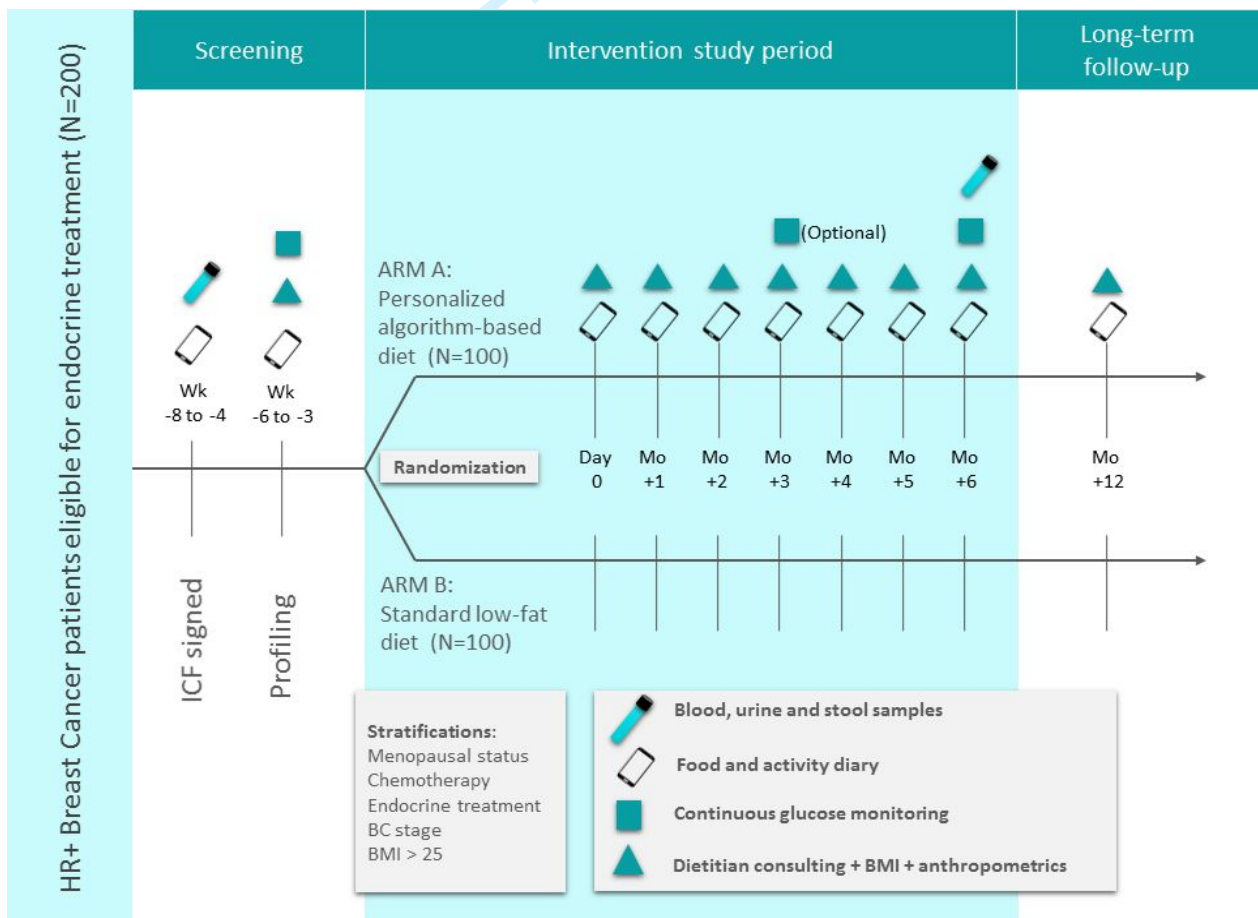

Figure 1: Study design and schedule



1  
2  
3  
4  
5 Inclusion Criteria:  
6

- 7
- 8 • Female patients, Age 18-70
  - 9 • Patients diagnosed with stage 1-3 breast cancer, who underwent surgery, have  
10 finished their neo/adjuvant chemotherapy and radiotherapy if these were indicated  
11 and are treated with adjuvant endocrine therapy (either Tamoxifen or Aromatase  
12 inhibitor +/- GNRH agonists).
  - 13 • Patients are at least 60 days after finishing their last non-endocrine oncology  
14 treatment (i.e. definitive surgery, radiation or chemotherapy – whichever is last),  
15 have received at least 30 days of endocrine therapy (tamoxifen or aromatase  
16 inhibitor) but no more than 24 months.
  - 17 • Patients treated with neoadjuvant endocrine therapy are eligible provided they had  
18 undergone surgery, are at least 60 days post their last non endocrine therapy  
19 (definitive surgery or radiation and chemotherapy, if these were indicated), are  
20 continuing their endocrine therapy but did not receive more than 24 months post-  
21 surgery.
  - 22 • Are willing to work with smartphone application
- 23  
24  
25  
26  
27

28 Exclusion Criteria:  
29

- 30
- 31 • Oral Antibiotics/antifungal use in the previous 3 months to profiling stage (these  
32 patients will be able to join the study at a later point)
  - 33 • Use of anti-diabetic and/or weight-loss medication
  - 34 • BMI<18.5
  - 35 • People under another diet regime and/or a dietitian consultation/another study?
  - 36 • Pregnancy, breast feeding
  - 37 • HIV carriers, Cushing syndrome, Chronic Kidney Disease, acromegaly,  
38 hyperthyroidism, liver cirrhosis
  - 39 • Psychiatric disorders (Schizophrenia, Bipolar Disorder)
  - 40 • Known diagnosis of IBD (inflammatory bowel diseases)
  - 41 • Patients that underwent Bariatric surgery
  - 42 • Known Alcohol or substance abuse
  - 43 • Known Diagnosis of diabetes
- 44  
45  
46  
47  
48  
49  
50  
51  
52  
53  
54  
55  
56  
57

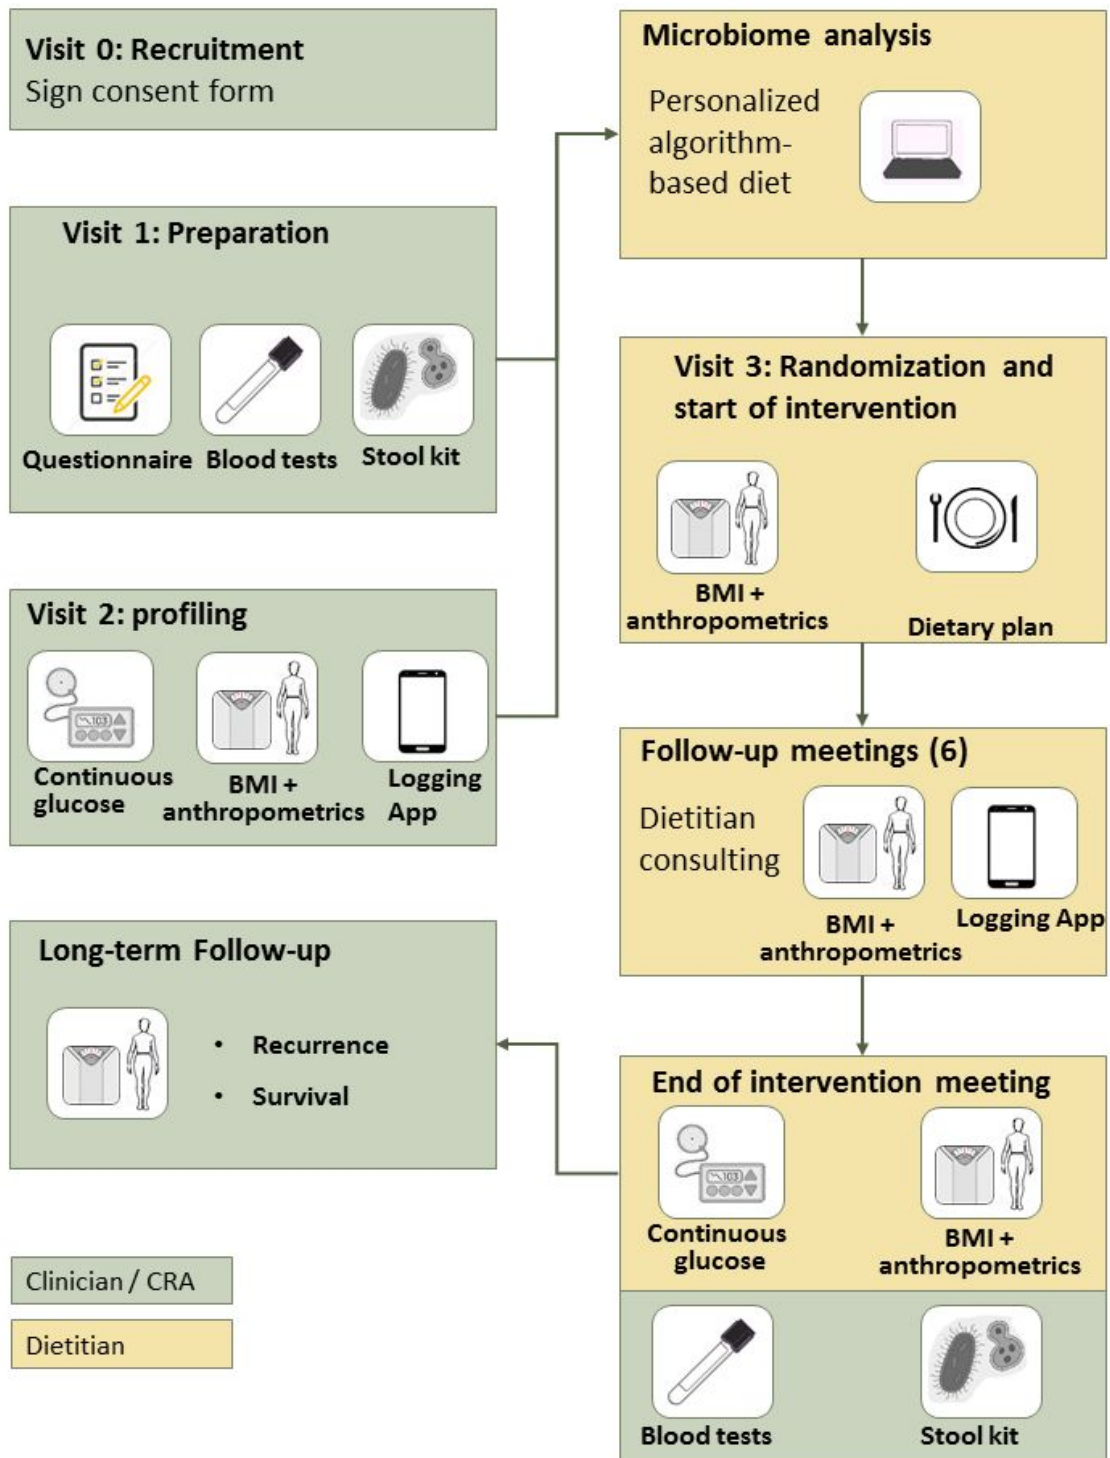

Figure 2: Study scheme

### Patient Recruitment

Breast cancer patients will be recruited to the study through their regular clinic visit at the Breast Oncology Unit at Sheba Medical Center. Patients eligible for the study will sign an informed consent. This recruitment process will be ongoing until the designated number of study patients is reached.

### Screening and profiling stage (-3 Months to Day -1 )

During this stage consenting patients will:

1. Meet a study coordinator and complete questionnaires regarding their medical background, nutritional habits and lifestyle activities (filled online using the REDcap software, using a dedicated tablet computer). Patients will provide blood samples for CBC, blood chemistry including liver function, lipid profiling, HBA1C, TSH, CRP, LH FSH and future exploratory analyses, and urine samples for estradiol derivatives. All patients will receive a code from the software and their data will be anonymized.
2. Patients will be asked to log a three-day food diary using a designated mobile phone application.
3. Patients will receive a designated stool kit to collect the stool sample at home. In the next meeting (profiling stage) patients will return the stool sample which will be used for microbiota profiling.
4. Meet with a certified dietitian to build a menu for the "profiling period" based on the three-day food diary of dietary habits provided by the patient. This meeting will include anthropometrics measurements (weight, height, waist and hip circumference) and connection to the glucose measurement device (Abbott Freestyle Libre). The CGM kit includes a sensor affixed to the back of the arm, which continuously monitors glucose levels in the interstitial fluid, translates and records blood glucose levels. Patients will be connected to a CGM for two weeks and will be asked to follow their diet plan as given to them by the dietitian, according to their regular habits and lifestyle. During the two weeks of connection patients will be instructed to use a dedicated application, in which they will

1  
2  
3 log in real-time their food diary, exercise, sleep, wake up, special events. Patients will  
4 return the CGM kit via a courier service from the patients' home upon measurement  
5 completion. The stool sample will be processed for microbiome profiling. The resulting  
6 data and data provided by the CGM kit will be analyzed to provide a personal profile for  
7 each patient.  
8  
9

### 10 11 12 Randomization and Intervention

13  
14 Following the profiling stage: patients will be randomly assigned to one of two arms of the  
15 study. Approximately 100 subjects will be randomized to each arm. Patients will be  
16 blinded to the arm to which they were assigned. Randomization will be done by a computer  
17 program, taking into account the following stratification factors:  
18  
19

- 20 1. Menopausal status at study entry
  - 21 2. Previous chemotherapy
  - 22 3. Endocrine treatment type (Tamoxifen/Aromatase inhibitor)
  - 23 4. Breast Cancer stage
  - 24 5. BMI above/below 25
- 25  
26  
27  
28  
29  
30

31 The intervention arm will be an 'algorithm-based' arm in which patients will receive  
32 personally tailored dietary recommendations. The prediction algorithm is based on gradient  
33 boosting regression model and is capable of accurately predicting personalized  
34 postprandial glycemc responses to arbitrary meals based on microbiome, CGM data from  
35 the profiling period (two weeks of CGM connection data) and other clinical data such as  
36 blood tests and lifestyle features. This model predicts PPGRs using the sum of thousands  
37 of different decision trees. Trees are inferred sequentially, with each tree trained on the  
38 residual of all previous trees and making a small contribution to the overall prediction. The  
39 features within each tree are selected by an inference procedure from a pool of 187 features  
40 representing meal content (e.g., energy, macronutrients, micronutrients); daily activity  
41 (e.g., meals, exercises, sleep times); blood parameters (e.g., HbA1c%, HDL cholesterol);  
42 CGM-derived features; questionnaires; and microbiome features (metagenomic relative  
43 abundances and KEGG pathways)[17]. The algorithm was developed using a standard  
44 leave-one-out scheme to rank every meal of each participant in the profiling period (i.e.,  
45  
46  
47  
48  
49  
50  
51  
52  
53  
54  
55  
56  
57

1  
2  
3 the PPGR to each predicted meal will be hidden from the predictor). The model was  
4 validated in an independently collected 100-person cohort . [17]  
5

6 The control arm will receive nutritional recommendations according to the standard Israeli  
7 dietary approach Mediterranean-style low-fat diet. In order to provide patients with diets  
8 that support their energetic needs and meet the recommendations for weight loss in people  
9 with overweight or obesity, the daily caloric target for each patient (in both arms) will be  
10 calculated as average between:  
11  
12  
13  
14

15 1. Estimated Energy Requirements (EER) calculated with the use of Mifflin equation for  
16 Resting Energy Expenditure (REE) [19]. The result from this equation will be divided by  
17 0.7 (as REE represent ~70% of total energy expenditure).  
18

19 2. Average daily caloric intake obtained from patient's log in the app during the profiling  
20 stage. For overweight patients (BMI>25) a total of 500Kcal will be reduced from their  
21 reported caloric intake to allow weight loss as accepted according to the American  
22 Association of Clinical Endocrinologists guidelines.  
23  
24  
25  
26

27 The diet recommendations for both arms will be provided and explained by a certified  
28 dietitian which will meet the patients from both arms at Day 0 and monthly thereafter for  
29 a total of 6 scheduled monthly visits. Weight and other anthropometric measurements  
30 (height, waist and hip circumference) will be taken at this and all following meetings with  
31 the dietitian. Participants will be asked to document their food intake and daily activities  
32 including exercise and sleep using a dedicated smartphone app throughout the intervention  
33 period.  
34  
35  
36  
37  
38  
39

#### 40 Intervention Meetings:

41 Patients from both arms will be invited during the intervention period to monthly follow-  
42 up meetings with a certified dietitian (total of 6 meetings). Meetings will include evaluation  
43 of patients' compliance to the dietary recommendations they received and additional advice  
44 will be provided if needed. During the follow up meetings anthropometric measurements  
45 will be taken (height, weight, hip and waist circumference). We will also follow up on  
46 patients via phone, email, text message, in order to increase compliance. During the  
47 monthly meeting at the beginning of Month 4 of the intervention period patients will be  
48  
49  
50  
51  
52  
53  
54  
55  
56  
57  
58  
59

1  
2  
3 offered to be reconnected to CGM for 2 weeks (optional). Data from CGM connections  
4 will be analyzed at the end of the intervention  
5

#### 6 End of intervention

7  
8 At the end of the 6 months intervention period, patients will be invited to a meeting in  
9 which they will undergo anthropometrics measurement, urine, blood samples and stool  
10 sample. Additionally, patients will be connected to CGM for 2 weeks (mandatory).  
11

12 Patients will be followed up at 12 months following the start of the intervention. They will  
13 attend a follow up meeting with the study coordinator in which BMI, anthropometrics, and  
14 a 3 day food diary will be recorded.  
15

#### 16 Long term follow up

17 Long-term clinical follow-up will be collected from the electronic medical records for  
18 recurrence and survival calculation purposes for a period of up to 5 years post recruitment.  
19

## 20 5. Data Acquisition, Storage and Analysis

21 All samples will be stored at the Breast Cancer translational Research laboratory at Sheba  
22 Medical Center. The samples will be stored at -80C, bacterial DNA samples will be stored  
23 at -20C. The samples will be stored encoded with no identifying information. Identifying  
24 details and codes will be kept in a file stored at Sheba medical center. Encoded stool  
25 samples will be transferred to the Segal laboratory at the Weizmann Institute of science.  
26 There, samples will be processed for bacterial DNA processing. All clinical data will be  
27 coded. Data will be transferred using the REDcap server and stored on Weizmann servers  
28 behind a protected firewall and be accessible only to the study team  
29

#### 30 Future research:

31 Samples will be stored for up to 10 years. All future use of stool and blood samples will  
32 be subject to IRB approval.  
33

## 34 6. Safety Endpoints

35 No safety endpoints planned for this study  
36

## 7. Statistical Considerations

**Sample size determination.** To estimate the required sample size, we performed power analysis while estimating effect size using the results of different studies describing controlled diet intervention aimed at weight control. Our goal is to detect a difference of at least 2 kg in net weight loss/gain (kg) between control group and experimental group. Based on the study of Shai et al. [20], the standard deviation of weight loss is 4.2 and the projected sample size with alpha of 0.05 and power of 0.8, with an estimated dropout rate of 10%, is 107 people for each arm totaling 214 individuals.

**Primary, secondary and exploratory endpoint analysis (brief summary).** All statistical analyses will be performed using Python 2.7. Continuous variables will be presented as mean±SD and dichotomous/categorical variables as proportions. The normality of the distribution of continuous variables will be tested by the Kolmogorov-Smirnov test. If normality will be rejected, non-parametric tests will be used. To test the association between continuous variables with normal distribution, the Pearson correlation coefficient will be performed and to test associations between continuous variables which do not distribute normally or for ordinal variable, the spearman correlation coefficient will be used. To compare parameters for continuous variables in 2 time points the paired-samples t-test will be performed (or Wilcoxon test for non-normally distribute variables), in dichotomous/categorical variables the McNemar test will be performed. To compare continuous variables in a number of time points ANOVA with repeated measures will be used. For comparison of dichotomous or categorical variables in number of time points the Cochran's Q test will be performed. P values < 0.05 will be considered significant.

## 8. Possible Benefits

Patients will receive counseling and close monitoring by a certified dietitian throughout the study, regardless of the research arm to which they were assigned

Patients will have the opportunity to evaluate their blood glucose levels in response to food that they tend to eat, exercise, etc., throughout the CGM connection.

Patients will receive an analysis of their glucose response to the foods that they ate.



1  
2  
3 Patients will have access to different nutritional tools that will be available to them on a  
4 secure website or on their mobile phone (App).

5  
6  
7 At the end of the study all patients will be given access to their personal tailored dietary  
8 recommendations, built for them by the study team based on their personal data, regardless  
9 of the arm they were assigned to during the study.  
10  
11

## 12 13 9. Possible Risks and Analysis of Risk/Benefit Ratio

14 When blood tests are taken, there is no risk except a slightly discomfort associated with the  
15 prick, hematoma or local infection it the prick area.  
16  
17

18  
19 In order to monitor glucose levels patients will be connected to a continuous glucose  
20 monitor (CGM). The CGM includes a sensor that will be inserted using a small needle into  
21 the body. There is ultra-low risk of inserting the sensor including mild discomfort  
22 associated with inserting the sensor, a local infection in the prick area, a mild redness at  
23 the patch area. We consider this risk to be quite low. Continuous Glucose Monitoring may  
24 reveal a previously undiagnosed diabetes. These patients will be excluded from the trial  
25 and the patient and treating oncologist will be notified to provide appropriate therapy and  
26 inform the patient's general physician.  
27  
28  
29  
30  
31  
32

33 Caloric restriction will be provided only to patients who are overweight or obese (BMI>25)  
34 and not to patients with BMI at the normal range (18.5-25). Patients with BMI lower than  
35 the normal range will be excluded from the study.  
36  
37  
38

## 39 10. Risk Management Procedures

### 40 Confidentiality

41 Patients will be identified by a numerical study ID. Only the designated research staff at  
42 Sheba Medical center will have access to the patient's fully identified medical information.  
43  
44 The information that matches the code to the identifying information will be kept in a  
45 safeguarded database that is password protected.  
46  
47  
48  
49  
50  
51  
52  
53  
54  
55  
56  
57



## 11. Subject Payment/Costs

Subjects will not be directly remunerated for participation in the study. There is no cost to the subject for study participation.

## 12. End of Study definition

It is estimated that accrual will be completed in approximately 24 months  
Time from initiation of intervention to last post intervention meeting – 12 months.  
End of the study is the date of the last visit for the last patient which will be approximately 36 months from first patient intervention

Clinical endpoints will be collected up to 5 years after end of intervention.

## 13. Consent Procedures

Study purpose, methods, materials, risks, benefits, and alternatives will be provided in a detailed description in the consent form and will be discussed with the patient by the investigator or authorized designee. Patients will be told they are free to refuse to participate and may withdraw their consent at any time for any reason. The consent forms will be signed and dated by the patient before his or her participation in the study. The informed consent forms and process shall be documented in the patients' clinical records. A copy of the signed consent form will be provided to the patient.

## 14. Privacy

If patients wish to review or discuss their results this information will be discussed in private consultation with the study team medical personnel.

## 15. Data Security

The collection and processing of personal data from subjects enrolled in this study will be limited to the data needed to investigate this study's hypothesis. Access to identifiable data will be limited to Sheba Medical Center designated personnel; patient level de-identified data will be available only to investigators authorized by the Principal Investigator.

Data files are stored on a password-protected computer/database and will be accessible only to the designated investigators and research staff. Only the research staff will have the link that can match the code to traditional identifying information. The data sets used

1  
2  
3 for analysis will be coded and not contain any traditionally used identifying information  
4 that could be used to identify the patient.  
5  
6  
7

## 8 16. Study/Intervention Discontinuation

9 Patients will be discontinued from study intervention in the following circumstances:

- 10 1. The patient is enrolled in any other clinical trial involving any investigational product  
11 or any other type of medical research judged not to be scientifically or medically  
12 compatible with this study.  
13
- 14 2. Investigator decision: the investigator decides that the patient should be discontinued  
15 from the study or study intervention if the patient, for any reason, requires treatment  
16 with a therapeutic agent that effects study indication/intervention or for medical, safety,  
17 regulatory, or other reasons consistent with applicable laws, regulations, and good  
18 clinical practice (GCP).  
19
- 20 3. Patient decision: If the patient requests to be withdrawn from study intervention but  
21 agrees to stay in the study she will be evaluable for the endpoint if she attended at least  
22 one follow-up meeting post randomization. If the patient wishes to withdraw  
23 participation in the study she can do so at any time and in such a case data and samples  
24 will be destroyed  
25
- 26 4. Disease recurrence.  
27
- 28 5. Discontinuation of Inadvertently Enrolled Patients: If the investigator identifies a  
29 patient who did not meet enrollment criteria and was inadvertently enrolled, a decision  
30 on whether or not the patient may remain on intervention will be made and documented.  
31 Patients will be evaluable for the primary endpoint if they were randomized and  
32 attended at least one follow up meeting post start of intervention.  
33  
34  
35  
36  
37  
38  
39  
40  
41  
42  
43  
44

## 45 17. Monitoring

46 Sheba Medical Center will monitor the study. Source documents will be reviewed to  
47 ensure all subjects have properly signed and dated the informed consent forms. All  
48 information will be reviewed to ensure eligibility criteria as per the protocol, and  
49 supporting source data will be verified.  
50  
51  
52  
53  
54  
55  
56  
57

## 18. Record Retention

Research records with patient identification will be kept for 10 years after study completion. The collected data and related de-identified health information may be kept indefinitely. Record retention will comply with the specific requirements of the Sheba Medical Center IRB. No personal health information will be retained.

## 19. Publication

The results of this research will be presented at meetings or in publication. However, the subject's identity will not be disclosed in those presentations.

## 20. Facilities and Personnel

All study activities will occur within the patient's home and breast cancer institute clinic at Sheba Medical Center. All communications with patients will be through the Sheba Medical Center.

## Bibliography

1. Vance V, Mourtzakis M, McCargar L, Hanning R. Weight gain in breast cancer survivors: prevalence, pattern and health consequences. *Obes Rev.* 2011 Apr;12(4):282–94.
2. Nyrop KA, Williams GR, Muss HB, Shachar SS. Weight gain during adjuvant endocrine treatment for early-stage breast cancer: What is the evidence? *Breast Cancer Res Treat.* 2016;158(2):203–17.
3. Goodwin PJ, Ennis M, Pritchard KI, McCreedy D, Koo J, Sidlofsky S, Trudeau M, Hood N, Redwood S. Adjuvant Treatment and Onset of Menopause Predict Weight Gain After Breast Cancer Diagnosis. *J Clin Oncol.* 1999 Jan 1;17(1):120.
4. Nyrop KA, Deal AM, Lee JT, Muss HB, Choi SK, Wheless A, Carey LA, Shachar SS. Weight gain in hormone receptor-positive (HR+) early-stage breast cancer: is it menopausal status or something else? *Breast Cancer Res Treat.* 2017;
5. Guo Q, Burgess S, Turman C, Bolla MK, Wang Q, Lush M, Abraham J, Aittomäki K, Andrulis IL, Apicella C, Arndt V, Barrdahl M, Benitez J, Berg CD, Blomqvist C, Bojesen SE, Bonanni B, Brand JS, Brenner H, Broeks A, Burwinkel B, Caldas C, Campa D, Canzian F, Chang-Claude J, Chanock SJ, Chin SF, Couch FJ, Cox A, Cross SS, Cybulski C, Czene K, Darabi H, Devilee P, Ryan Diver W, Dunning AM, Earl HM, Eccles DM, Ekici AB, Eriksson M, Evans DG, Fasching PA, Figueroa J, Flesch-Janys D, Flyger H, Gapstur SM, Gaudet MM, Giles GG, Glendon G, Grip M, Gronwald J, Haeberle L, Haiman CA, Hall P, Hamann U, Hankinson S, Hartikainen JM, Hein A, Hiller L, Hogervorst FB, Holleccek B, Hooning MJ, Hoover RN, Humphreys K, Hunter DJ, Hüsing A, Jakubowska A, Jukkola-Vuorinen A, Kaaks R, Kabisch M, Kataja V, Knight JA, Koppert LB, Kosma VM, Kristensen VN, Lambrechts D, Le Marchand L, Li J, Lindblom A, Lindström S, Lissowska J, Lubinski J, Machiela MJ, Mannermaa A, Manoukian S, Margolin S, Marme F, Martens JWM, McLean C, Menéndez P, Milne RL, Mulligan AM, Muranen TA, Nevanlinna H, Neven P, Nielsen SF, Nordestgaard BG, Olson JE, Perez JIA, Peterlongo P, Phillips KA, Poole CJ, Pylkäs K, Radice P, Rahman N, Rüdiger T, Rudolph A, Sawyer EJ, Schumacher F, Seibold P, Seynaeve C, Shah M, Smeets A, Southey MC, Tollenaar RAEM, Tomlinson I, Tsimiklis H, Ulmer HU, Vachon C, van den Ouweland AMW, Van't Veer LJ, Wildiers H, Willett W, Winqvist R, Zamora MP, Chenevix-Trench G, Dörk T, Easton DF, García-Closas M, Kraft P, Hopper JL, Zheng W, Schmidt MK, Pharoah PDP. Body mass index and breast cancer survival: A Mendelian randomization analysis. *Int J Epidemiol.* 2017;46(6):1891–902.
6. Plottel CS, Blaser MJ. Microbiome and malignancy. *Cell Host Microbe.* 2011;10(4):324–35.

- 1  
2  
3 7. Erdman SE, Poutahidis T. Gut bacteria and cancer. *Biochim Biophys Acta*.  
4 2015;1856(1):86–90.  
5
- 6  
7 8. Vrieze A, Holleman F, Zoetendal EG, De Vos WM, Hoekstra JBL, Nieuwdorp M. The  
8 environment within: How gut microbiota may influence metabolism and body  
9 composition. Vol. 53, *Diabetologia*. 2010. p. 606–13.  
10
- 11 9. Shulzhenko N, Morgun A, Hsiao W, Battle M, Yao M, Gavrilova O, Orandle M,  
12 Mayer L, Macpherson AJ, McCoy KD, Fraser-Liggett C, Matzinger P. Crosstalk  
13 between B lymphocytes, microbiota and the intestinal epithelium governs  
14 immunity versus metabolism in the gut. *Nat Med*. 2011;17(12):1585–93.  
15
- 16  
17 10. Shapira I, Sultan K, Lee A, Taioli E. Evolving concepts: how diet and the intestinal  
18 microbiome act as modulators of breast malignancy. *ISRN Oncol*.  
19 2013;2013(693920):1–10.  
20
- 21  
22 11. Flores R, Shi J, Fuhrman B, Xu X, Veenstra TD, Gail MH, Gajer P, Ravel J, Goedert  
23 JJ. Fecal microbial determinants of fecal and systemic estrogens and estrogen  
24 metabolites: a cross-sectional study. *J Transl Med*. 2012;10:253.  
25
- 26  
27 12. Goedert JJ, Jones G, Hua X, Xu X, Yu G, Flores R, Falk RT, Gail MH, Shi J, Ravel J,  
28 Feigelson HS. Investigation of the Association Between the Fecal Microbiota and  
29 Breast Cancer in Postmenopausal Women: A Population-Based Case-Control Pilot  
30 Study. *J Natl Cancer Inst*. 2015;107(8):1–5.  
31
- 32  
33 13. Kwa M, Plottel CS, Blaser MJ, Adams S. The Intestinal Microbiome and Estrogen  
34 Receptor-Positive Female Breast Cancer. *J Natl Cancer Inst*. 2016;108(8):1–10.  
35
- 36  
37 14. Menni C, Jackson MA, Pallister T, Steves CJ, Spector TD, Valdes AM. Gut  
38 microbiome diversity and high-fibre intake are related to lower long-term weight  
39 gain. *Int J Obes*. 2017;41(7):1099–105.  
40
- 41  
42 15. Thaïss CA, Itav S, Rothschild D, Meijer M, Levy M, Moresi C, Dohnalova L,  
43 Braverman S, Rozin S, Malitsky S, Dori-Bachash M, Kuperman Y, Biton I, Gertler A,  
44 Harmelin A, Shapiro H, Halpern Z, Aharoni A, Segal E, Elinav E. Persistent  
45 microbiome alterations modulate the rate of post-dieting weight regain. *Nature*.  
46 2016 Nov;540:544–51.  
47
- 48  
49 16. Endogenous Hormones and Breast Cancer Collaborative Group. Body Mass Index,  
50 Serum Sex Hormones, and Breast Cancer Risk in Postmenopausal Women. *JNCI J*  
51 *Natl Cancer Inst [Internet]*. 2003;95(16):1218–26. Available from:  
52 <http://jnci.oxfordjournals.org/cgi/doi/10.1093/jnci/djg022>  
53
- 54  
55 17. Zeevi D, Korem T, Zmora N, Israeli D, Rothschild D, Weinberger A, Ben-Yacov O,  
56 Lador D, Avnit-Sagi T, Lotan-Pompan M, Suez J, Mahdi JA, Matot E, Malka G,  
57

- 1  
2  
3 Kosower N, Rein M, Zilberman-Schapira G, Dohnalova L, Pevsner-Fischer M,  
4 Bikovsky R, Halpern Z, Elinav E, Segal E. Personalized Nutrition by Prediction of  
5 Glycemic Responses. *Cell*. 2015;163(5):1079–94.  
6  
7  
8 18. Juanola-Falgarona M, Salas-Salvadó J, Ibarrola-Jurado N, Rabassa-Soler A, Díaz-  
9 López A, Guasch-Ferré M, Hernández-Alonso P, Balanza R, Bulló M. Effect of the  
10 glycemic index of the diet on weight loss, modulation of satiety, inflammation,  
11 and other metabolic risk factors: a randomized controlled trial. *Am J Clin Nutr*.  
12 2014;100(1):27–35.  
13  
14  
15 19. Mifflin MD, Jeor STS, Hill LA, Scott BJ, Daugherty SA, Koh YO. A new predictive  
16 equation for resting energy expenditure in healthy individuals. *Am J Clin Nutr*  
17 [Internet]. 1990;51(2):241–7. Available from:  
18 [http://ajcn.nutrition.org/content/51/2/241%5Cnhttp://ajcn.nutrition.org/content](http://ajcn.nutrition.org/content/51/2/241%5Cnhttp://ajcn.nutrition.org/content/51/2/241.abstract%5Cnhttp://www.ncbi.nlm.nih.gov/pubmed/2305711)  
19 [/51/2/241.abstract%5Cnhttp://www.ncbi.nlm.nih.gov/pubmed/2305711](http://ajcn.nutrition.org/content/51/2/241.abstract%5Cnhttp://www.ncbi.nlm.nih.gov/pubmed/2305711)  
20  
21  
22 20. Shai I, Schwarzfuchs D, Henkin Y, Shahar DR, Witkow S, Greenberg I, Golan R,  
23 Fraser D, Bolotin A, Vardi H, Tangi-Rozental O, Zuk-Ramot R, Sarusi B, Brickner D,  
24 Schwartz Z, Sheiner E, Marko R, Katorza E, Thiery J, Fiedler GM, Bluher M,  
25 Stumvoll M, Stampfer MJ. Weight loss with a low-carbohydrate, Mediterranean,  
26 or low-fat diet. *N Engl J Med*. 2008 Jul;359(3):229–41.  
27  
28  
29  
30  
31  
32  
33  
34  
35  
36  
37  
38  
39  
40  
41  
42  
43  
44  
45  
46  
47  
48  
49  
50  
51  
52  
53  
54  
55  
56  
57  
58  
59  
60

## Appendix 1: Samples Collection, Storage and Analysis

Blood: during the study we will collect blood samples 2 times : At the initial screening, and at the end of the intervention, at time points 0 and 6m. Two blood samples will be taken- one sample for immediate analysis and a second sample (blood and plasma) would be stored in deep freeze (-80°C) for future metabolomics testing (blood tests are detailed in schedule of activities table, see Appendix 2).

Stool: Patients will be asked to provide several stool sample at 2 time points throughout the study. Stool samples are required for the study, and will be collected at baseline and at the end of intervention. Stool samples will be stored at Sheba Medical center and transferred to Segal lab at the Weizmann Institute. The samples will be stored encoded with no identifying information. The samples will be stored at -80C, bacterial DNA samples will be stored at -20C. The samples will be stored for 10 years. Identifying details and codes will be kept by the principal investigator and designated personnel. All future use of stool samples will be subject to Helsinki approval.

Urine: urine samples will be taken from every patient at 2 time points, including at the beginning and at the end of the intervention, in order to characterize estradiol derivatives.

## Appendix 2: Schedule of activities

| Trial period                                                                  | Screening     |               | Profiling  |    | Intervention |    |    |    |    |     | End of treatment        |   | Followup |   |
|-------------------------------------------------------------------------------|---------------|---------------|------------|----|--------------|----|----|----|----|-----|-------------------------|---|----------|---|
|                                                                               | week -8 to -4 | week -4 to -3 | Day 0 (M1) | M2 | M3           | M4 | M5 | M6 | M7 | M12 | Every 6 months (5years) |   |          |   |
| Scheduling window                                                             |               |               |            |    |              |    |    |    |    |     |                         |   |          |   |
| Signed ICF                                                                    | X             |               |            |    |              |    |    |    |    |     |                         |   |          |   |
| Review of eligibility                                                         | X             |               |            |    |              |    |    |    |    |     |                         |   |          |   |
| Medical History                                                               | X             |               |            |    |              |    |    |    |    |     |                         |   |          |   |
| Nutrition/Lifestyle/Medical Questionnaire                                     | X             |               |            |    |              |    |    |    |    |     |                         |   |          |   |
| Weight                                                                        |               | X             | X          | X  | X            | X  | X  | X  | X  | X   | X                       | X | X        | X |
| Height                                                                        |               | X             | X          | X  | X            | X  | X  | X  | X  | X   | X                       | X | X        | X |
| Other Anthropometrics                                                         |               | X             | X          | X  | X            | X  | X  | X  | X  | X   | X                       | X | X        | X |
| Provision of stool kit                                                        | X             |               |            |    |              |    |    |    |    |     |                         |   |          |   |
| CBC                                                                           |               |               | X          |    |              |    |    |    |    |     |                         |   |          |   |
| Blood Chemistry including total serum protein and albumin and fasting glucose |               |               | X          |    |              |    |    |    |    |     |                         |   |          |   |
| Lipid profiling                                                               |               |               | X          |    |              |    |    |    |    |     |                         |   |          |   |
| Liver profiling (GGT, Bilirubin, Alkaline Phosphatase, AST,ALT)               |               |               | X          |    |              |    |    |    |    |     |                         |   |          |   |
| TSH                                                                           |               |               | X          |    |              |    |    |    |    |     |                         |   |          |   |
| CRP                                                                           |               |               | X          |    |              |    |    |    |    |     |                         |   |          |   |
| HbA1C                                                                         |               |               | X          |    |              |    |    |    |    |     |                         |   |          |   |
| Hormonal Profiling (LH, FSH)                                                  |               |               | X          |    |              |    |    |    |    |     |                         |   |          |   |
| Urinalysis (estradial derivatives)                                            |               |               | X          |    |              |    |    |    |    |     |                         |   |          |   |
| Whole blood sample for expiratory analysis                                    |               |               | X          |    |              |    |    |    |    |     |                         |   |          |   |
| Dietitian Consult                                                             |               |               | X          | X  | X            | X  | X  | X  | X  | X   | X                       | X | X        | X |
| Profiling stage menu                                                          |               |               | X          |    |              |    |    |    |    |     |                         |   |          |   |
| Food and Activity Diary log in                                                |               |               | X          | X  | X            | X  | X  | X  | X  | X   | X                       | X | X        | X |
| Continuous Glucose Monitoring Connection ( 2 weeks)                           |               | X             | X          | X  | X            | X  | X  | X  | X  | X   | X                       | X | X        | X |
| Survival And Breast Cancer recurrence follow up                               |               |               |            |    |              |    |    |    |    |     |                         |   |          |   |
| Hormonal Treatment Adherence Follow up                                        |               |               |            |    |              |    |    |    |    |     |                         |   |          |   |
| Diet Adherence follow up (weekly phone, text or email followup)               | X             |               |            | X  | X            | X  | X  | X  | X  | X   | X                       | X | X        | X |



|    |                                               |
|----|-----------------------------------------------|
| 1  |                                               |
| 2  | <b>List of features - PPGR predictions</b>    |
| 3  | <b>Blood tests</b>                            |
| 4  | HbA1C%                                        |
| 5  | Hemoglobin                                    |
| 6  | FastingGlucose                                |
| 7  | <b>Anthropometric (measured at profiling)</b> |
| 8  | BMI                                           |
| 9  | BodyFat                                       |
| 10 | Waist                                         |
| 11 | Weight                                        |
| 12 | Hips                                          |
| 13 | <b>Dietary components of the meal</b>         |
| 14 | Alanine_g                                     |
| 15 | Alcohol_g                                     |
| 16 | Arginine_g                                    |
| 17 | Caffeine_mg                                   |
| 18 | Calcium_mg                                    |
| 19 | Carbohydrate_g                                |
| 20 | Cholesterol_mg                                |
| 21 | Energy_kcal                                   |
| 22 | Fructose_g                                    |
| 23 | Galactose_g                                   |
| 24 | Glucose_g                                     |
| 25 | Isoleucine_g                                  |
| 26 | Lactose_g                                     |
| 27 | Leucine_g                                     |
| 28 | Magnesium_mg                                  |
| 29 | Maltose_g                                     |
| 30 | Niacin_mg                                     |
| 31 | Phenylalanine_g                               |
| 32 | Protein_g                                     |
| 33 | Sodium_mg                                     |
| 34 | Starch_g                                      |
| 35 | Sucrose_g                                     |
| 36 | SugarsTotal_g                                 |
| 37 | Thiamin_mg                                    |
| 38 | TotalDietaryFiber_g                           |
| 39 | TotalLipid_g                                  |
| 40 | TotalMonounsaturatedFattyAcids_g              |
| 41 | TotalPolyunsaturatedFattyAcids_g              |
| 42 | TotalSaturatedFattyAcids_g                    |
| 43 | TotalTransFattyAcids_g                        |
| 44 | VitaminC_mg                                   |
| 45 | VitaminD_IU                                   |
| 46 | VitaminE_mg                                   |
| 47 | Water_g                                       |
| 48 | Zinc_mg                                       |
| 49 | <b>Health questionnaire</b>                   |
| 50 | Age                                           |
| 51 | Currently_smokes                              |
| 52 | Evening_Hunger                                |
| 53 | Ever_smoked                                   |
| 54 | Gender                                        |
| 55 |                                               |
| 56 |                                               |
| 57 |                                               |
| 58 |                                               |
| 59 |                                               |
| 60 |                                               |

1  
2  
3  
4  
5  
6  
7  
8  
9  
10  
11  
12  
13  
14  
15  
16  
17  
18  
19  
20  
21  
22  
23  
24  
25  
26  
27  
28  
29  
30  
31  
32  
33  
34  
35  
36  
37  
38  
39  
40  
41  
42  
43  
44  
45  
46  
47  
48  
49  
50  
51  
52  
53  
54  
55  
56  
57  
58  
59  
60

|                                     |
|-------------------------------------|
| General_Hunger                      |
| Is_pregnant                         |
| Midday_Hunger                       |
| Morning_Hunger                      |
| Physical_activity_-_freq            |
| Physical_activity_-_mins            |
| Regular_defecation                  |
| Sleep_quality                       |
| Stress                              |
| Work_activity                       |
| <b>Microbiome features</b>          |
| s_Acidaminococcus_unclassified      |
| s_Adlercreutzia_equolifaciens       |
| s_Akkermansia_muciniphila           |
| s_Alistipes_finegoldii              |
| s_Alistipes_indistinctus            |
| s_Alistipes_nderdonkii              |
| s_Alistipes_putredinis              |
| s_Alistipes_senegalensis            |
| s_Alistipes_shahii                  |
| s_Anaerostipes_hadrus               |
| s_Anaerotruncus_unclassified        |
| s_Bacteroidales_bacterium_ph8       |
| s_Bacteroides_caccae                |
| s_Bacteroides_cellulosilyticus      |
| s_Bacteroides_clarus                |
| s_Bacteroides_dorei                 |
| s_Bacteroides_eggerthii             |
| s_Bacteroides_faecis                |
| s_Bacteroides_finegoldii            |
| s_Bacteroides_fragilis              |
| s_Bacteroides_intestinalis          |
| s_Bacteroides_massiliensis          |
| s_Bacteroides_nordii                |
| s_Bacteroides_ovatus                |
| s_Bacteroides_plebeius              |
| s_Bacteroides_salyersiae            |
| s_Bacteroides_stercoris             |
| s_Bacteroides_thetaiotaomicron      |
| s_Bacteroides_uniformis             |
| s_Bacteroides_vulgatus              |
| s_Bacteroides_xylanisolvans         |
| s_Barnesiella_intestinihominis      |
| s_Bifidobacterium_adolescentis      |
| s_Bifidobacterium_animalis          |
| s_Bifidobacterium_bifidum           |
| s_Bifidobacterium_catenuatum        |
| s_Bifidobacterium_longum            |
| s_Bifidobacterium_pseudocatenulatum |
| s_Bilophila_unclassified            |
| s_Bilophila_wadsworthia             |
| s_Burkholderiales_bacterium_1_1_47  |
| s_Catenibacterium_mitsuokai         |

|    |                                             |
|----|---------------------------------------------|
| 1  | s_Clostridium_bartlettii                    |
| 2  | s_Clostridium_bolteae                       |
| 3  | s_Clostridium_leptum                        |
| 4  | s_Collinsella_aerofaciens                   |
| 5  | s_Coprobacter_fastidiosus                   |
| 6  | s_Coprococcus_catus                         |
| 7  | s_Coprococcus_comes                         |
| 8  | s_Coprococcus_sp_ART55_1                    |
| 9  | s_Desulfovibrio_desulfuricans               |
| 10 | s_Desulfovibrio_piger                       |
| 11 | s_Dorea_formicigenerans                     |
| 12 | s_Dorea_longicatena                         |
| 13 | s_Eggerthella_unclassified                  |
| 14 | s_Erysipelotrichaceae_bacterium_6_1_45      |
| 15 | s_Escherichia_coli                          |
| 16 | s_Escherichia_unclassified                  |
| 17 | s_Eubacterium_biforme                       |
| 18 | s_Eubacterium_eligens                       |
| 19 | s_Eubacterium_hallii                        |
| 20 | s_Eubacterium_ramulus                       |
| 21 | s_Eubacterium_rectale                       |
| 22 | s_Eubacterium_siraeum                       |
| 23 | s_Eubacterium_ventriosum                    |
| 24 | s_Faecalibacterium_prausnitzii              |
| 25 | s_Flavonifractor_plautii                    |
| 26 | s_Gordonibacter_pamelaeae                   |
| 27 | s_Haemophilus_parainfluenzae                |
| 28 | s_Holdemania_unclassified                   |
| 29 | s_Lachnospiraceae_bacterium_1_1_57FAA       |
| 30 | s_Lachnospiraceae_bacterium_2_1_58FAA       |
| 31 | s_Lachnospiraceae_bacterium_3_1_46FAA       |
| 32 | s_Lachnospiraceae_bacterium_5_1_63FAA       |
| 33 | s_Lachnospiraceae_bacterium_7_1_58FAA       |
| 34 | s_Lachnospiraceae_bacterium_8_1_57FAA       |
| 35 | s_Lactobacillus_ruminis                     |
| 36 | s_Lactococcus_lactis                        |
| 37 | s_Megamonas_unclassified                    |
| 38 | s_Methanobrevibacter_smithii                |
| 39 | s_Odoribacter_splanchnicus                  |
| 40 | s_Oscillibacter_unclassified                |
| 41 | s_Oxalobacter_formigenes                    |
| 42 | s_Parabacteroides_distasonis                |
| 43 | s_Parabacteroides_goldsteinii               |
| 44 | s_Parabacteroides_johnsonii                 |
| 45 | s_Parabacteroides_merdae                    |
| 46 | s_Parabacteroides_unclassified              |
| 47 | s_Paraprevotella_clara                      |
| 48 | s_Paraprevotella_unclassified               |
| 49 | s_Paraprevotella_xylaniphila                |
| 50 | s_Parasutterella_excrementihominis          |
| 51 | s_Peptostreptococcaceae_noname_unclassified |
| 52 | s_Phascolarctobacterium_succinatutens       |
| 53 | s_Prevotella_copri                          |

|    |                                |
|----|--------------------------------|
| 1  | s_Roseburia_hominis            |
| 2  | s_Roseburia_intestinalis       |
| 3  | s_Roseburia_inulinivorans      |
| 4  | s_Roseburia_unclassified       |
| 5  | s_Ruminococcus_albus           |
| 6  | s_Ruminococcus_bromii          |
| 7  | s_Ruminococcus_callidus        |
| 8  | s_Ruminococcus_gnavus          |
| 9  | s_Ruminococcus_lactaris        |
| 10 | s_Ruminococcus_obeum           |
| 11 | s_Ruminococcus_sp_5_1_39BFAA   |
| 12 | s_Ruminococcus_torques         |
| 13 | s_Streptococcus_parasanguinis  |
| 14 | s_Streptococcus_salivarius     |
| 15 | s_Streptococcus_thermophilus   |
| 16 | s_Subdoligranulum_unclassified |
| 17 | s_Sutterella_wadsworthensis    |
| 18 | s_Veillonella_parvula          |
| 19 |                                |
| 20 |                                |
| 21 |                                |
| 22 |                                |
| 23 |                                |
| 24 |                                |
| 25 |                                |
| 26 |                                |
| 27 |                                |
| 28 |                                |
| 29 |                                |
| 30 |                                |
| 31 |                                |
| 32 |                                |
| 33 |                                |
| 34 |                                |
| 35 |                                |
| 36 |                                |
| 37 |                                |
| 38 |                                |
| 39 |                                |
| 40 |                                |
| 41 |                                |
| 42 |                                |
| 43 |                                |
| 44 |                                |
| 45 |                                |
| 46 |                                |
| 47 |                                |
| 48 |                                |
| 49 |                                |
| 50 |                                |
| 51 |                                |
| 52 |                                |
| 53 |                                |
| 54 |                                |
| 55 |                                |
| 56 |                                |
| 57 |                                |
| 58 |                                |
| 59 |                                |
| 60 |                                |

# Reporting checklist for protocol of a clinical trial.

Based on the SPIRIT guidelines.

## Instructions to authors

Complete this checklist by entering the page numbers from your manuscript where readers will find each of the items listed below.

Your article may not currently address all the items on the checklist. Please modify your text to include the missing information. If you are certain that an item does not apply, please write "n/a" and provide a short explanation.

Upload your completed checklist as an extra file when you submit to a journal.

In your methods section, say that you used the SPIRIT reporting guidelines, and cite them as:

Chan A-W, Tetzlaff JM, Gøtzsche PC, Altman DG, Mann H, Berlin J, Dickersin K, Hróbjartsson A, Schulz KF, Parulekar WR, Krleža-Jerić K, Laupacis A, Moher D. SPIRIT 2013 Explanation and Elaboration: Guidance for protocols of clinical trials. *BMJ*. 2013;346:e7586

|                                   |                                                                                                                                 | Page   |
|-----------------------------------|---------------------------------------------------------------------------------------------------------------------------------|--------|
|                                   | Reporting Item                                                                                                                  | Number |
| <b>Administrative information</b> |                                                                                                                                 |        |
| Title                             | <a href="#">#1</a> Descriptive title identifying the study design, population, interventions, and, if applicable, trial acronym | 1      |

|    |                     |                     |                                                            |            |
|----|---------------------|---------------------|------------------------------------------------------------|------------|
| 1  | Trial registration  | <a href="#">#2a</a> | Trial identifier and registry name. If not yet registered, | 2          |
| 2  |                     |                     |                                                            |            |
| 3  |                     |                     |                                                            |            |
| 4  |                     |                     | name of intended registry                                  |            |
| 5  |                     |                     |                                                            |            |
| 6  | Trial registration: | <a href="#">#2b</a> | All items from the World Health Organization Trial         | n/a, We    |
| 7  |                     |                     |                                                            |            |
| 8  | data set            |                     | Registration Data Set                                      | added the  |
| 9  |                     |                     |                                                            |            |
| 10 |                     |                     |                                                            |            |
| 11 |                     |                     |                                                            | MOH        |
| 12 |                     |                     |                                                            |            |
| 13 |                     |                     |                                                            | identifier |
| 14 |                     |                     |                                                            |            |
| 15 |                     |                     |                                                            |            |
| 16 | Protocol version    | <a href="#">#3</a>  | Date and version identifier                                | Protocol   |
| 17 |                     |                     |                                                            |            |
| 18 |                     |                     |                                                            | attached   |
| 19 |                     |                     |                                                            |            |
| 20 |                     |                     |                                                            |            |
| 21 |                     |                     |                                                            |            |
| 22 | Funding             | <a href="#">#4</a>  | Sources and types of financial, material, and other        | 16         |
| 23 |                     |                     |                                                            |            |
| 24 |                     |                     | support                                                    |            |
| 25 |                     |                     |                                                            |            |
| 26 |                     |                     |                                                            |            |
| 27 | Roles and           | <a href="#">#5a</a> | Names, affiliations, and roles of protocol contributors    | 16-17      |
| 28 |                     |                     |                                                            |            |
| 29 | responsibilities:   |                     |                                                            |            |
| 30 |                     |                     |                                                            |            |
| 31 | contributorship     |                     |                                                            |            |
| 32 |                     |                     |                                                            |            |
| 33 |                     |                     |                                                            |            |
| 34 |                     |                     |                                                            |            |
| 35 | Roles and           | <a href="#">#5b</a> | Name and contact information for the trial sponsor         | 16         |
| 36 |                     |                     |                                                            |            |
| 37 | responsibilities:   |                     |                                                            |            |
| 38 |                     |                     |                                                            |            |
| 39 | sponsor contact     |                     |                                                            |            |
| 40 |                     |                     |                                                            |            |
| 41 | information         |                     |                                                            |            |
| 42 |                     |                     |                                                            |            |
| 43 |                     |                     |                                                            |            |
| 44 |                     |                     |                                                            |            |
| 45 | Roles and           | <a href="#">#5c</a> | Role of study sponsor and funders, if any, in study        | 16         |
| 46 |                     |                     |                                                            |            |
| 47 | responsibilities:   |                     | design; collection, management, analysis, and              |            |
| 48 |                     |                     |                                                            |            |
| 49 | sponsor and funder  |                     | interpretation of data; writing of the report; and the     |            |
| 50 |                     |                     |                                                            |            |
| 51 |                     |                     | decision to submit the report for publication, including   |            |
| 52 |                     |                     |                                                            |            |
| 53 |                     |                     | whether they will have ultimate authority over any of      |            |
| 54 |                     |                     |                                                            |            |
| 55 |                     |                     | these activities                                           |            |
| 56 |                     |                     |                                                            |            |
| 57 |                     |                     |                                                            |            |
| 58 |                     |                     |                                                            |            |
| 59 |                     |                     |                                                            |            |
| 60 |                     |                     |                                                            |            |

|    |                           |                     |                                                          |             |
|----|---------------------------|---------------------|----------------------------------------------------------|-------------|
| 1  | Roles and                 | <a href="#">#5d</a> | Composition, roles, and responsibilities of the          | 16          |
| 2  |                           |                     |                                                          |             |
| 3  | responsibilities:         |                     | coordinating centre, steering committee, endpoint        |             |
| 4  |                           |                     |                                                          |             |
| 5  | committees                |                     | adjudication committee, data management team, and        |             |
| 6  |                           |                     |                                                          |             |
| 7  |                           |                     | other individuals or groups overseeing the trial, if     |             |
| 8  |                           |                     |                                                          |             |
| 9  |                           |                     | applicable (see Item 21a for data monitoring             |             |
| 10 |                           |                     |                                                          |             |
| 11 |                           |                     | committee)                                               |             |
| 12 |                           |                     |                                                          |             |
| 13 |                           |                     |                                                          |             |
| 14 |                           |                     |                                                          |             |
| 15 | <b>Introduction</b>       |                     |                                                          |             |
| 16 |                           |                     |                                                          |             |
| 17 |                           |                     |                                                          |             |
| 18 | Background and            | <a href="#">#6a</a> | Description of research question and justification for   | 3           |
| 19 |                           |                     |                                                          |             |
| 20 | rationale                 |                     | undertaking the trial, including summary of relevant     |             |
| 21 |                           |                     |                                                          |             |
| 22 |                           |                     | studies (published and unpublished) examining            |             |
| 23 |                           |                     |                                                          |             |
| 24 |                           |                     | benefits and harms for each intervention                 |             |
| 25 |                           |                     |                                                          |             |
| 26 |                           |                     |                                                          |             |
| 27 |                           |                     |                                                          |             |
| 28 | Background and            | <a href="#">#6b</a> | Explanation for choice of comparators                    | 4           |
| 29 |                           |                     |                                                          |             |
| 30 | rationale: choice of      |                     |                                                          |             |
| 31 |                           |                     |                                                          |             |
| 32 | comparators               |                     |                                                          |             |
| 33 |                           |                     |                                                          |             |
| 34 |                           |                     |                                                          |             |
| 35 |                           |                     |                                                          |             |
| 36 | Objectives                | <a href="#">#7</a>  | Specific objectives or hypotheses                        | 4           |
| 37 |                           |                     |                                                          |             |
| 38 |                           |                     |                                                          |             |
| 39 | Trial design              | <a href="#">#8</a>  | Description of trial design including type of trial (eg, | 4, figure 1 |
| 40 |                           |                     |                                                          |             |
| 41 |                           |                     | parallel group, crossover, factorial, single group),     |             |
| 42 |                           |                     |                                                          |             |
| 43 |                           |                     | allocation ratio, and framework (eg, superiority,        |             |
| 44 |                           |                     |                                                          |             |
| 45 |                           |                     | equivalence, non-inferiority, exploratory)               |             |
| 46 |                           |                     |                                                          |             |
| 47 |                           |                     |                                                          |             |
| 48 |                           |                     |                                                          |             |
| 49 | <b>Methods:</b>           |                     |                                                          |             |
| 50 |                           |                     |                                                          |             |
| 51 | <b>Participants,</b>      |                     |                                                          |             |
| 52 |                           |                     |                                                          |             |
| 53 | <b>interventions, and</b> |                     |                                                          |             |
| 54 |                           |                     |                                                          |             |
| 55 | <b>outcomes</b>           |                     |                                                          |             |
| 56 |                           |                     |                                                          |             |
| 57 |                           |                     |                                                          |             |
| 58 |                           |                     |                                                          |             |
| 59 |                           |                     |                                                          |             |
| 60 |                           |                     |                                                          |             |

|    |                      |                      |                                                            |           |
|----|----------------------|----------------------|------------------------------------------------------------|-----------|
| 1  | Study setting        | <a href="#">#9</a>   | Description of study settings (eg, community clinic,       | 5         |
| 2  |                      |                      | academic hospital) and list of countries where data will   |           |
| 3  |                      |                      | be collected. Reference to where list of study sites can   |           |
| 4  |                      |                      | be obtained                                                |           |
| 5  |                      |                      |                                                            |           |
| 6  |                      |                      |                                                            |           |
| 7  |                      |                      |                                                            |           |
| 8  |                      |                      |                                                            |           |
| 9  |                      |                      |                                                            |           |
| 10 |                      |                      |                                                            |           |
| 11 | Eligibility criteria | <a href="#">#10</a>  | Inclusion and exclusion criteria for participants. If      | Table 1,  |
| 12 |                      |                      | applicable, eligibility criteria for study centres and     | page 7    |
| 13 |                      |                      | individuals who will perform the interventions (eg,        |           |
| 14 |                      |                      | surgeons, psychotherapists)                                |           |
| 15 |                      |                      |                                                            |           |
| 16 |                      |                      |                                                            |           |
| 17 |                      |                      |                                                            |           |
| 18 |                      |                      |                                                            |           |
| 19 |                      |                      |                                                            |           |
| 20 |                      |                      |                                                            |           |
| 21 | Interventions:       | <a href="#">#11a</a> | Interventions for each group with sufficient detail to     | 8-11      |
| 22 | description          |                      | allow replication, including how and when they will be     |           |
| 23 |                      |                      | administered                                               |           |
| 24 |                      |                      |                                                            |           |
| 25 |                      |                      |                                                            |           |
| 26 |                      |                      |                                                            |           |
| 27 |                      |                      |                                                            |           |
| 28 |                      |                      |                                                            |           |
| 29 | Interventions:       | <a href="#">#11b</a> | Criteria for discontinuing or modifying allocated          | 6-7       |
| 30 | modifications        |                      | interventions for a given trial participant (eg, drug dose |           |
| 31 |                      |                      | change in response to harms, participant request, or       |           |
| 32 |                      |                      | improving / worsening disease)                             |           |
| 33 |                      |                      |                                                            |           |
| 34 |                      |                      |                                                            |           |
| 35 |                      |                      |                                                            |           |
| 36 |                      |                      |                                                            |           |
| 37 |                      |                      |                                                            |           |
| 38 |                      |                      |                                                            |           |
| 39 | Interventions:       | <a href="#">#11c</a> | Strategies to improve adherence to intervention            | 12-13;    |
| 40 | adherence            |                      | protocols, and any procedures for monitoring               | Figure 2c |
| 41 |                      |                      | adherence (eg, drug tablet return; laboratory tests)       |           |
| 42 |                      |                      |                                                            |           |
| 43 |                      |                      |                                                            |           |
| 44 |                      |                      |                                                            |           |
| 45 |                      |                      |                                                            |           |
| 46 | Interventions:       | <a href="#">#11d</a> | Relevant concomitant care and interventions that are       | Table 1,  |
| 47 | concomitant care     |                      | permitted or prohibited during the trial                   | page 7    |
| 48 |                      |                      |                                                            |           |
| 49 |                      |                      |                                                            |           |
| 50 |                      |                      |                                                            |           |
| 51 | Outcomes             | <a href="#">#12</a>  | Primary, secondary, and other outcomes, including the      | 14, Box 1 |
| 52 |                      |                      | specific measurement variable (eg, systolic blood          |           |
| 53 |                      |                      | pressure), analysis metric (eg, change from baseline,      |           |
| 54 |                      |                      |                                                            |           |
| 55 |                      |                      |                                                            |           |
| 56 |                      |                      |                                                            |           |
| 57 |                      |                      |                                                            |           |
| 58 |                      |                      |                                                            |           |
| 59 |                      |                      |                                                            |           |
| 60 |                      |                      |                                                            |           |





|    |                      |                                                                            |      |
|----|----------------------|----------------------------------------------------------------------------|------|
| 1  |                      | document that is unavailable to those who enrol                            |      |
| 2  |                      |                                                                            |      |
| 3  |                      | participants or assign interventions                                       |      |
| 4  |                      |                                                                            |      |
| 5  |                      |                                                                            |      |
| 6  | Allocation           | <a href="#">#16b</a> Mechanism of implementing the allocation sequence     | 11   |
| 7  |                      |                                                                            |      |
| 8  | concealment          | (eg, central telephone; sequentially numbered,                             |      |
| 9  |                      |                                                                            |      |
| 10 | mechanism            | opaque, sealed envelopes), describing any steps to                         |      |
| 11 |                      |                                                                            |      |
| 12 |                      | conceal the sequence until interventions are assigned                      |      |
| 13 |                      |                                                                            |      |
| 14 |                      |                                                                            |      |
| 15 |                      |                                                                            |      |
| 16 | Allocation:          | <a href="#">#16c</a> Who will generate the allocation sequence, who will   | 11   |
| 17 |                      |                                                                            |      |
| 18 | implementation       | enrol participants, and who will assign participants to                    |      |
| 19 |                      |                                                                            |      |
| 20 |                      | interventions                                                              |      |
| 21 |                      |                                                                            |      |
| 22 |                      |                                                                            |      |
| 23 | Blinding (masking)   | <a href="#">#17a</a> Who will be blinded after assignment to interventions | 11   |
| 24 |                      |                                                                            |      |
| 25 |                      | (eg, trial participants, care providers, outcome                           |      |
| 26 |                      |                                                                            |      |
| 27 |                      | assessors, data analysts), and how                                         |      |
| 28 |                      |                                                                            |      |
| 29 |                      |                                                                            |      |
| 30 |                      |                                                                            |      |
| 31 | Blinding (masking):  | <a href="#">#17b</a> If blinded, circumstances under which unblinding is   | 12   |
| 32 |                      |                                                                            |      |
| 33 | emergency            | permissible, and procedure for revealing a participant's                   |      |
| 34 |                      |                                                                            |      |
| 35 | unblinding           | allocated intervention during the trial                                    |      |
| 36 |                      |                                                                            |      |
| 37 |                      |                                                                            |      |
| 38 |                      |                                                                            |      |
| 39 | <b>Methods: Data</b> |                                                                            |      |
| 40 |                      |                                                                            |      |
| 41 | collection,          |                                                                            |      |
| 42 |                      |                                                                            |      |
| 43 | management, and      |                                                                            |      |
| 44 |                      |                                                                            |      |
| 45 | analysis             |                                                                            |      |
| 46 |                      |                                                                            |      |
| 47 |                      |                                                                            |      |
| 48 | Data collection plan | <a href="#">#18a</a> Plans for assessment and collection of outcome,       | 9-11 |
| 49 |                      |                                                                            |      |
| 50 |                      | baseline, and other trial data, including any related                      |      |
| 51 |                      |                                                                            |      |
| 52 |                      | processes to promote data quality (eg, duplicate                           |      |
| 53 |                      |                                                                            |      |
| 54 |                      | measurements, training of assessors) and a                                 |      |
| 55 |                      |                                                                            |      |
| 56 |                      | description of study instruments (eg, questionnaires,                      |      |
| 57 |                      |                                                                            |      |
| 58 |                      |                                                                            |      |
| 59 |                      |                                                                            |      |
| 60 |                      |                                                                            |      |

laboratory tests) along with their reliability and validity,  
if known. Reference to where data collection forms can  
be found, if not in the protocol

|                                                                                                                  |                                                                              |                                                                                                                                                                                                                                                                          |                  |
|------------------------------------------------------------------------------------------------------------------|------------------------------------------------------------------------------|--------------------------------------------------------------------------------------------------------------------------------------------------------------------------------------------------------------------------------------------------------------------------|------------------|
| <p>1<br/>2<br/>3<br/>4<br/>5<br/>6<br/>7<br/>8<br/>9<br/>10<br/>11<br/>12<br/>13<br/>14<br/>15<br/>16<br/>17</p> | <p>Data collection plan: <a href="#">#18b</a></p>                            | <p>Plans to promote participant retention and complete follow-up, including list of any outcome data to be collected for participants who discontinue or deviate from intervention protocols</p>                                                                         | <p>Figure 2A</p> |
| <p>18<br/>19<br/>20<br/>21<br/>22<br/>23<br/>24<br/>25<br/>26<br/>27<br/>28<br/>29<br/>30<br/>31</p>             | <p>Data management <a href="#">#19</a></p>                                   | <p>Plans for data entry, coding, security, and storage, including any related processes to promote data quality (eg, double data entry; range checks for data values). Reference to where details of data management procedures can be found, if not in the protocol</p> | <p>8,15</p>      |
| <p>32<br/>33<br/>34<br/>35<br/>36<br/>37<br/>38<br/>39<br/>40<br/>41</p>                                         | <p>Statistics: outcomes <a href="#">#20a</a></p>                             | <p>Statistical methods for analysing primary and secondary outcomes. Reference to where other details of the statistical analysis plan can be found, if not in the protocol</p>                                                                                          | <p>14-15</p>     |
| <p>42<br/>43<br/>44<br/>45<br/>46</p>                                                                            | <p>Statistics: additional analyses <a href="#">#20b</a></p>                  | <p>Methods for any additional analyses (eg, subgroup and adjusted analyses)</p>                                                                                                                                                                                          | <p>14-15</p>     |
| <p>47<br/>48<br/>49<br/>50<br/>51<br/>52<br/>53<br/>54<br/>55<br/>56</p>                                         | <p>Statistics: analysis population and missing data <a href="#">#20c</a></p> | <p>Definition of analysis population relating to protocol non-adherence (eg, as randomised analysis), and any statistical methods to handle missing data (eg, multiple imputation)</p>                                                                                   | <p>14-15</p>     |

## Methods: Monitoring

|    |                      |                      |                                                          |     |
|----|----------------------|----------------------|----------------------------------------------------------|-----|
| 1  | Data monitoring:     | <a href="#">#21a</a> | Composition of data monitoring committee (DMC);          | n/a |
| 2  |                      |                      |                                                          |     |
| 3  | formal committee     |                      | summary of its role and reporting structure; statement   |     |
| 4  |                      |                      | of whether it is independent from the sponsor and        |     |
| 5  |                      |                      | competing interests; and reference to where further      |     |
| 6  |                      |                      | details about its charter can be found, if not in the    |     |
| 7  |                      |                      | protocol. Alternatively, an explanation of why a DMC is  |     |
| 8  |                      |                      | not needed                                               |     |
| 9  |                      |                      |                                                          |     |
| 10 |                      |                      |                                                          |     |
| 11 |                      |                      |                                                          |     |
| 12 |                      |                      |                                                          |     |
| 13 |                      |                      |                                                          |     |
| 14 |                      |                      |                                                          |     |
| 15 |                      |                      |                                                          |     |
| 16 |                      |                      |                                                          |     |
| 17 |                      |                      |                                                          |     |
| 18 | Data monitoring:     | <a href="#">#21b</a> | Description of any interim analyses and stopping         | n/a |
| 19 | interim analysis     |                      | guidelines, including who will have access to these      |     |
| 20 |                      |                      | interim results and make the final decision to terminate |     |
| 21 |                      |                      | the trial                                                |     |
| 22 |                      |                      |                                                          |     |
| 23 |                      |                      |                                                          |     |
| 24 |                      |                      |                                                          |     |
| 25 |                      |                      |                                                          |     |
| 26 |                      |                      |                                                          |     |
| 27 |                      |                      |                                                          |     |
| 28 | Harms                | <a href="#">#22</a>  | Plans for collecting, assessing, reporting, and          | 12  |
| 29 |                      |                      | managing solicited and spontaneously reported            |     |
| 30 |                      |                      | adverse events and other unintended effects of trial     |     |
| 31 |                      |                      | interventions or trial conduct                           |     |
| 32 |                      |                      |                                                          |     |
| 33 |                      |                      |                                                          |     |
| 34 |                      |                      |                                                          |     |
| 35 |                      |                      |                                                          |     |
| 36 |                      |                      |                                                          |     |
| 37 |                      |                      |                                                          |     |
| 38 | Auditing             | <a href="#">#23</a>  | Frequency and procedures for auditing trial conduct, if  | n/a |
| 39 |                      |                      | any, and whether the process will be independent from    |     |
| 40 |                      |                      | investigators and the sponsor                            |     |
| 41 |                      |                      |                                                          |     |
| 42 |                      |                      |                                                          |     |
| 43 |                      |                      |                                                          |     |
| 44 |                      |                      |                                                          |     |
| 45 | <b>Ethics and</b>    |                      |                                                          |     |
| 46 | <b>dissemination</b> |                      |                                                          |     |
| 47 |                      |                      |                                                          |     |
| 48 |                      |                      |                                                          |     |
| 49 |                      |                      |                                                          |     |
| 50 |                      |                      |                                                          |     |
| 51 | Research ethics      | <a href="#">#24</a>  | Plans for seeking research ethics committee /            | 2   |
| 52 | approval             |                      | institutional review board (REC / IRB) approval          |     |
| 53 |                      |                      |                                                          |     |
| 54 |                      |                      |                                                          |     |
| 55 |                      |                      |                                                          |     |
| 56 |                      |                      |                                                          |     |
| 57 |                      |                      |                                                          |     |
| 58 |                      |                      |                                                          |     |
| 59 |                      |                      |                                                          |     |
| 60 |                      |                      |                                                          |     |

|                                                             |                                      |                      |                                                                                                                                                                                                                                    |     |
|-------------------------------------------------------------|--------------------------------------|----------------------|------------------------------------------------------------------------------------------------------------------------------------------------------------------------------------------------------------------------------------|-----|
| 1<br>2<br>3<br>4<br>5<br>6<br>7<br>8<br>9<br>10<br>11<br>12 | Protocol amendments                  | <a href="#">#25</a>  | Plans for communicating important protocol modifications (eg, changes to eligibility criteria, outcomes, analyses) to relevant parties (eg, investigators, REC / IRBs, trial participants, trial registries, journals, regulators) | n/a |
| 13<br>14<br>15<br>16<br>17<br>18<br>19<br>20                | Consent or assent                    | <a href="#">#26a</a> | Who will obtain informed consent or assent from potential trial participants or authorised surrogates, and how (see Item 32)                                                                                                       | 13  |
| 21<br>22<br>23<br>24<br>25<br>26<br>27                      | Consent or assent: ancillary studies | <a href="#">#26b</a> | Additional consent provisions for collection and use of participant data and biological specimens in ancillary studies, if applicable                                                                                              | 15  |
| 28<br>29<br>30<br>31<br>32<br>33<br>34<br>35<br>36<br>37    | Confidentiality                      | <a href="#">#27</a>  | How personal information about potential and enrolled participants will be collected, shared, and maintained in order to protect confidentiality before, during, and after the trial                                               | 15  |
| 38<br>39<br>40<br>41<br>42<br>43                            | Declaration of interests             | <a href="#">#28</a>  | Financial and other competing interests for principal investigators for the overall trial and each study site                                                                                                                      | 14  |
| 44<br>45<br>46<br>47<br>48<br>49<br>50                      | Data access                          | <a href="#">#29</a>  | Statement of who will have access to the final trial dataset, and disclosure of contractual agreements that limit such access for investigators                                                                                    | 15  |
| 51<br>52<br>53<br>54<br>55<br>56<br>57<br>58<br>59<br>60    | Ancillary and post trial care        | <a href="#">#30</a>  | Provisions, if any, for ancillary and post-trial care, and for compensation to those who suffer harm from trial participation                                                                                                      | 12  |

|    |                                            |                                                                              |     |
|----|--------------------------------------------|------------------------------------------------------------------------------|-----|
| 1  | Dissemination policy: <a href="#">#31a</a> | Plans for investigators and sponsor to communicate                           | 15  |
| 2  |                                            |                                                                              |     |
| 3  | trial results                              | trial results to participants, healthcare professionals,                     |     |
| 4  |                                            | the public, and other relevant groups (eg, via                               |     |
| 5  |                                            | publication, reporting in results databases, or other                        |     |
| 6  |                                            | data sharing arrangements), including any publication                        |     |
| 7  |                                            | restrictions                                                                 |     |
| 8  |                                            |                                                                              |     |
| 9  |                                            |                                                                              |     |
| 10 |                                            |                                                                              |     |
| 11 | Dissemination policy: <a href="#">#31b</a> | Authorship eligibility guidelines and any intended use                       | 15  |
| 12 |                                            |                                                                              |     |
| 13 | authorship                                 | of professional writers                                                      |     |
| 14 |                                            |                                                                              |     |
| 15 |                                            |                                                                              |     |
| 16 | Dissemination policy: <a href="#">#31c</a> | Plans, if any, for granting public access to the full                        | 15  |
| 17 |                                            |                                                                              |     |
| 18 | reproducible                               | protocol, participant-level dataset, and statistical code                    |     |
| 19 |                                            |                                                                              |     |
| 20 | research                                   |                                                                              |     |
| 21 |                                            |                                                                              |     |
| 22 |                                            |                                                                              |     |
| 23 |                                            |                                                                              |     |
| 24 |                                            |                                                                              |     |
| 25 |                                            |                                                                              |     |
| 26 |                                            |                                                                              |     |
| 27 |                                            |                                                                              |     |
| 28 | <b>Appendices</b>                          |                                                                              |     |
| 29 |                                            |                                                                              |     |
| 30 |                                            |                                                                              |     |
| 31 | Informed consent                           | <a href="#">#32</a> Model consent form and other related documentation       | n/a |
| 32 |                                            |                                                                              |     |
| 33 | materials                                  | given to participants and authorised surrogates                              |     |
| 34 |                                            |                                                                              |     |
| 35 |                                            |                                                                              |     |
| 36 |                                            |                                                                              |     |
| 37 | Biological specimens                       | <a href="#">#33</a> Plans for collection, laboratory evaluation, and storage | 15  |
| 38 |                                            |                                                                              |     |
| 39 |                                            | of biological specimens for genetic or molecular                             |     |
| 40 |                                            | analysis in the current trial and for future use in                          |     |
| 41 |                                            | ancillary studies, if applicable                                             |     |
| 42 |                                            |                                                                              |     |
| 43 |                                            |                                                                              |     |
| 44 |                                            |                                                                              |     |
| 45 |                                            |                                                                              |     |
| 46 |                                            |                                                                              |     |

## Notes:

- 2b: n/a, We added the MOH identifier
- 8: 4, figure 1
- 11c: 11; figure 2c

- 1 • 12: 12-13, Box 1  
2  
3  
4 • 13: Figure 1 ; 6-9 The SPIRIT Explanation and Elaboration paper is distributed under the terms  
5 of the Creative Commons Attribution License CC-BY-NC. This checklist was completed on 24.  
6 February 2022 using <https://www.goodreports.org/>, a tool made by the [EQUATOR Network](#) in  
7 collaboration with [Penelope.ai](#)  
8  
9  
10  
11  
12  
13  
14  
15  
16  
17  
18  
19  
20  
21  
22  
23  
24  
25  
26  
27  
28  
29  
30  
31  
32  
33  
34  
35  
36  
37  
38  
39  
40  
41  
42  
43  
44  
45  
46  
47  
48  
49  
50  
51  
52  
53  
54  
55  
56  
57  
58  
59  
60

# BMJ Open

## BREast Cancer Personalized NuTrition (BREACPNT) - dietary intervention in breast cancer survivors treated with endocrine therapy: A protocol for a randomized clinical trial

|                                 |                                                                                                                                                                                                                                                                                                                                                                                                                                                                                                                                                                                                                                                                                                                                                                                                                                                                                                                                                                                                                                                                                                                                                                                                                                                                                                                                                                                                                                            |
|---------------------------------|--------------------------------------------------------------------------------------------------------------------------------------------------------------------------------------------------------------------------------------------------------------------------------------------------------------------------------------------------------------------------------------------------------------------------------------------------------------------------------------------------------------------------------------------------------------------------------------------------------------------------------------------------------------------------------------------------------------------------------------------------------------------------------------------------------------------------------------------------------------------------------------------------------------------------------------------------------------------------------------------------------------------------------------------------------------------------------------------------------------------------------------------------------------------------------------------------------------------------------------------------------------------------------------------------------------------------------------------------------------------------------------------------------------------------------------------|
| Journal:                        | <i>BMJ Open</i>                                                                                                                                                                                                                                                                                                                                                                                                                                                                                                                                                                                                                                                                                                                                                                                                                                                                                                                                                                                                                                                                                                                                                                                                                                                                                                                                                                                                                            |
| Manuscript ID                   | bmjopen-2022-062498.R2                                                                                                                                                                                                                                                                                                                                                                                                                                                                                                                                                                                                                                                                                                                                                                                                                                                                                                                                                                                                                                                                                                                                                                                                                                                                                                                                                                                                                     |
| Article Type:                   | Protocol                                                                                                                                                                                                                                                                                                                                                                                                                                                                                                                                                                                                                                                                                                                                                                                                                                                                                                                                                                                                                                                                                                                                                                                                                                                                                                                                                                                                                                   |
| Date Submitted by the Author:   | 27-Oct-2022                                                                                                                                                                                                                                                                                                                                                                                                                                                                                                                                                                                                                                                                                                                                                                                                                                                                                                                                                                                                                                                                                                                                                                                                                                                                                                                                                                                                                                |
| Complete List of Authors:       | Rein, Michal; Weizmann Institute of Science, Department of Computer Science and Applied Mathematics; Weizmann Institute of Science, Department of Molecular Cell Biology<br>Dadiani, Maya; Sheba Medical Center, Cancer Research Center<br>Godneva, Anastasia; Weizmann Institute of Science, Department of Computer Science and Applied Mathematics; Weizmann Institute of Science, Department of Molecular Cell Biology<br>Bakalenik-Gavry, Michal; Sheba Medical Center, Cancer Research Center<br>Morzaev-Sulzbach, Dana; Sheba Medical Center, Cancer Research Center<br>Vachnish, Yaeli; Sheba Medical Center, Cancer Research Center<br>Kolobkov, Dmitry; Weizmann Institute of Science, Department of Computer Science and Applied Mathematics; Weizmann Institute of Science, Department of Molecular Cell Biology<br>Lotan-Pompan, maya; Weizmann Institute of Science, Department of Computer Science and Applied Mathematics; Weizmann Institute of Science, Department of Molecular Cell Biology<br>Weinberger, Adina; Weizmann Institute of Science, Department of Computer Science and Applied Mathematics; Weizmann Institute of Science, Department of Molecular Cell Biology<br>Segal, Eran; Weizmann Institute of Science, Department of Computer Science and Applied Mathematics; Weizmann Institute of Science, Department of Molecular Cell Biology<br>Gal-Yam, Einav Nili; Sheba Medical Center, Oncology Institute |
| <b>Primary Subject Heading</b>: | Oncology                                                                                                                                                                                                                                                                                                                                                                                                                                                                                                                                                                                                                                                                                                                                                                                                                                                                                                                                                                                                                                                                                                                                                                                                                                                                                                                                                                                                                                   |
| Secondary Subject Heading:      | Nutrition and metabolism                                                                                                                                                                                                                                                                                                                                                                                                                                                                                                                                                                                                                                                                                                                                                                                                                                                                                                                                                                                                                                                                                                                                                                                                                                                                                                                                                                                                                   |
| Keywords:                       | NUTRITION & DIETETICS, Breast tumours < ONCOLOGY, Microbiology < NATURAL SCIENCE DISCIPLINES                                                                                                                                                                                                                                                                                                                                                                                                                                                                                                                                                                                                                                                                                                                                                                                                                                                                                                                                                                                                                                                                                                                                                                                                                                                                                                                                               |
|                                 |                                                                                                                                                                                                                                                                                                                                                                                                                                                                                                                                                                                                                                                                                                                                                                                                                                                                                                                                                                                                                                                                                                                                                                                                                                                                                                                                                                                                                                            |

SCHOLARONE™  
Manuscripts



1  
2  
3 **BREast Cancer Personalized NuTrition (BREACPNT) - dietary intervention in**  
4 **breast cancer survivors treated with endocrine therapy: A protocol for a**  
5 **randomized clinical trial**  
6  
7

8 Michal Rein<sup>3,4</sup>, Maya Dadiani<sup>1</sup>, Anastasia Godneva<sup>3,4</sup>, Michal Bakalenik-Gavry<sup>1</sup>, Dana  
9 Morzaev-Sulzbach<sup>1</sup>, Yaeli Vachnish<sup>1</sup>, Dmitry Kolobkov<sup>3,4</sup>, Maya Lotan-Pompan<sup>3,4</sup>,  
10 Adina Weinberger<sup>3,4</sup>, Eran Segal<sup>3,4</sup> and Einav Nili Gal-Yam<sup>2</sup>  
11  
12  
13  
14

15 <sup>1</sup>Sheba Medical Center, Cancer Research Center, Tel-Hashomer, Ramat Gan, 5262100, Israel

16 <sup>2</sup>Sheba Medical Center, Oncology Institute, Tel-Hashomer, Ramat Gan, 5262100, Israel

17 <sup>3</sup>Department of Computer Science and Applied Mathematics, Weizmann Institute of Science, Rehovot 7610001, Israel

18 <sup>4</sup>Department of Molecular Cell Biology, Weizmann Institute of Science, Rehovot 7610001, Israel  
19

20 **Corresponding authors**  
21

22 Correspondence to Dr Einav Nili Gal-Yam<sup>2</sup>, [Einav.NiliGalYam@sheba.health.gov.il](mailto:Einav.NiliGalYam@sheba.health.gov.il) Prof. Eran Segal<sup>3,4</sup>, [eran.segal@weizmann.ac.il](mailto:eran.segal@weizmann.ac.il)  
23  
24

25 <sup>2</sup>Sheba Medical Center, Oncology Institute, Tel-Hashomer, Ramat Gan, 5262100, Israel

26 <sup>3</sup>Department of Computer Science and Applied Mathematics, Weizmann Institute of Science, Rehovot 7610001, Israel

27 <sup>4</sup>Department of Molecular Cell Biology, Weizmann Institute of Science, Rehovot 7610001, Israel  
28  
29  
30  
31  
32  
33  
34  
35  
36  
37  
38  
39  
40  
41  
42  
43  
44  
45  
46  
47  
48  
49  
50  
51  
52  
53  
54  
55  
56  
57  
58  
59  
60

Word count: 3986

## ABSTRACT

**Introduction:** Breast cancer survivors treated with adjuvant endocrine therapy commonly experience weight gain, which has been associated with low adherence to therapy and worse breast cancer prognosis. We aim to assess whether a personalized postprandial glucose targeting diet will be beneficial for weight management as compared to the recommended Mediterranean diet in this patient population

**Methods and Analysis:** The BREAst Cancer Personalized NuTrition (BREACPNT) study is a phase-2 randomized trial in Hormone Receptor positive (HR+) breast cancer patients, treated with adjuvant endocrine therapy. The study objective is to assess whether dietary intervention intended to improve postprandial glyceimic response to meals results in better weight and glyceimic control in this population as compared to the standard recommended Mediterranean diet. Consenting participants will be assigned in a single blinded fashion to either of two dietary arms (Mediterranean diet or an algorithm-based personalized diet). They will be asked to provide a stool sample for microbiome analysis and will undergo continuous glucose monitoring for two weeks, at the initiation and termination of the intervention period. Microbiome composition data will be used to tailor personal dietary recommendations. After randomization and provision of dietary recommendations, participants will be asked to continuously log their diet and lifestyle activities on a designated smartphone application during the 6-month intervention period, during which they will be monthly monitored by a certified dietitian. Participants' clinical records will be followed twice yearly for five years for treatment adherence, disease free survival and recurrence.

**Ethics and dissemination:** The study has been approved by the ethics committee in the Sheba medical center (file 5725-18-SMC, Ramat Gan, Israel) and the Weizmann Institutional Review Board (file 693-2, Rehovot, Israel). The findings of this study will be published in a peer reviewed publication.

ClinicalTrials.gov Identifier: NCT04079270

MOH Identifier: 2019-03-28\_006056

### Strengths and limitations of this study

- A single blinded study where patients are being assigned to one out of two dietary arms (Mediterranean diet or an algorithm-based personalized diet).
- The personalized diet involves advanced machine-learning analysis of multi-omics dataset, including microbiome, continuous glucose monitoring, metabolomics features and full dietary records.
- A homogenous study population including HR+, early stage breast cancer survivors treated with adjuvant endocrine therapy, albeit representing mostly women from the center of Israel.
- Patients are being randomized into the two study arms and stratified by stage, treatment type, menopausal status and BMI.
- The study design includes daily use of smartphone application for logging dietary intake and lifestyle events. This may lead to exclusion of patients inaccessible to smartphone app on a daily basis.

### INTRODUCTION

The majority (~75%) of breast cancer patients are diagnosed with hormone receptor-positive (HR+) tumors and are assigned adjuvant endocrine treatment (ET) for a period of at least 5 years, which was shown to improve survival. However, adjuvant ET is associated with distressing side-effects which may be long lasting and substantially impair patients' quality of life and adherence to treatment. These side effects include weight gain and body composition changes, which are common in breast cancer survivors and are experienced by many women during treatment and for years after diagnosis(1–3). Weight gain in this population is complex and is associated with various factors such as tumor type, menopausal status(4), pre-diagnosis body mass index (BMI)(5) and neo-adjuvant/adjuvant treatment type including chemotherapy and ET(2,6). Importantly, weight gain after breast cancer

1  
2  
3 diagnosis is associated with increased risk for metabolic syndrome and cardiac disease  
4 (7,8), and was reported as a risk factor for breast cancer recurrence and shorter  
5 survival(4,9,10). Therefore, weight management strategies including diet, regular  
6  
7 physical activity and cognitive behavioral therapy are recommended for controlling  
8  
9 weight gain in breast cancer patients. Previous studies showed that weight loss  
10  
11 interventions, incorporating diet, exercise and psychosocial support, in overweight or  
12  
13 obese breast cancer survivors appear to result in decreased body weight, BMI and  
14  
15 waist circumference and improvement in overall quality of life(11). We chose the  
16  
17 Mediterranean (MED) diet as a control diet because it is commonly recommended in  
18  
19 different countries including Israel(12) and was suggested to improve metabolic  
20  
21 health in the general population as well as within breast cancer survivors(13–15). Still,  
22  
23 the optimal weight loss intervention method and the impact of weight loss on survival  
24  
25 outcomes is unclear. Furthermore, the interaction between the microbiome of breast  
26  
27 cancer patients and dietary intervention has not been assessed.

28  
29 The comprehensive role of the gut microbiome in modulating immune and  
30  
31 metabolic health is increasingly recognized. Dysbiosis, referring to the disruption in  
32  
33 the balance of gut bacterial communities, is associated with many conditions(16). The  
34  
35 gut microbiome homeostasis can be influenced by internal factors, such as genetic,  
36  
37 age-related and hormonal-related, as well as by external factors, such as stress,  
38  
39 lifestyle and antibiotics(17). In addition, the microbiome is directly affected by the  
40  
41 individual diet which in turn affects the body's response to food (18,19). Particularly  
42  
43 relevant to breast cancer, diet plays an important role in creating a microbiome  
44  
45 environment involved in estrogen metabolism(20). High estrogen levels contribute to  
46  
47 breast cancer risk in postmenopausal women(21). In a recent study, gut microbiome  
48  
49 diversity was linked to weight gain(22) and microbiome alterations were found to  
50  
51 contribute to post-dieting weight regain(23). In addition, it was found that the  
52  
53 increase in breast cancer risk with increasing BMI among postmenopausal women is  
54  
55 associated with an increase in estrogens, particularly bioavailable estradiol (24). In a  
56  
57 previous study we showed in an unprecedented scale of 800 people that individuals  
58  
59 vary greatly in their glycemc response to the same food(25). Importantly, this study  
60  
emphasized the involvement of functional microbial pathways and bacterial taxa in

1  
2  
3 host glucose metabolism. This unique dataset yielded an algorithm capable of  
4 accurately predicting personalized postprandial glycemic response (PPGR) to arbitrary  
5 meals. The algorithm's predictions are based on personal measurements, including  
6 blood tests, personal lifestyle and gut bacteria profiles. In a following study  
7 implementing a 6-month dietary intervention plan in individuals with prediabetes, the  
8 Personalized Postprandial-glucose-response Targeting (PPT) approach significantly  
9 improved glycemic control and reduced PPGRs as compared to the commonly  
10 recommended Mediterranean diet (26).  
11  
12  
13  
14  
15  
16  
17

18 In this study we seek to evaluate the clinical efficacy of the PPT diet combined  
19 with caloric restriction, compared to the Mediterranean diet, in promoting weight  
20 maintenance or weight loss and glycemic control in HR+ early stage breast cancer  
21 survivors treated with adjuvant ET.  
22  
23  
24  
25

## 26 **METHODS**

### 27 **Study design**

28  
29  
30  
31  
32 This study is a two-arm, parallel group, single-blinded, randomized controlled trial in  
33 early stage HR+ breast cancer patients treated with adjuvant endocrine therapy.  
34 Eligible participants will undergo a 6-month nutrition intervention program which will  
35 include dietary recommendations, daily logging and monthly follow up meetings  
36 provided by a certified dietician. Upon trial entry and after profiling (described below)  
37 participants will be randomly and equally assigned to the Personalized Postprandial-  
38 glucose-response Targeting (PPT) dietary (arm A) or to the Mediterranean-style (MED)  
39 dietary (arm B). All meetings will take place in the Breast Oncology Institute at the  
40 Sheba Medical Center. The primary objective of the study is to evaluate the efficacy  
41 of the PPT arm vs the MED arm in controlling body mass changes in the patient  
42 population during the intervention period (see summarized study endpoints in **BOX 1**.  
43 For complete SPIRIT checklist and the full protocol see Supplemental material no.1  
44 and 2 respectively)  
45  
46  
47  
48  
49  
50  
51  
52  
53  
54  
55  
56  
57  
58  
59  
60

**BOX 1 – STUDY ENDPOINTS****Primary endpoint**

Body weight changes defined as the net body weight gained/lost in the 6-month intervention period

**Secondary endpoint**

Glycemic response as measured by the area under the glucose curve (AUC) during continuous glucose monitoring (CGM) period pre-intervention and during the intervention.

**Exploratory endpoint**

- Five years Disease free survival (DFS)
- Microbiome and blood metabolites modulation during the diet interventions- tested using the samples taken at profiling and 6month time points.
- Adherence to algorithm-based personalized diets, compared to standard diets advised for weight control – assessed by monthly compliance questionnaire.
- HR+ breast cancer patients' adherence to hormonal treatment
- Translational studies

**Patient and public involvement**

Research questions and outcome measures were partially based on numerous encounters of ENG in the clinic with breast cancer patients voicing concerns regarding weight gain and optimal diet while on endocrine treatment for breast cancer. Furthermore, Patients are being involved in the recruitment effort by actively publishing the study recruitment information and sharing their own experience during the study, via social networks and breast cancer survivors' groups. The patients are being followed up in the clinic for a long period of time (~10 years). Accumulating study results will be summarized periodically, transferred to the study team including treating and recruiting physicians and through them transferred to patients during clinic visits. Patients will also be informed regarding publications and specific results through the cancer institute social network and digital

resources (such as the Sheba oncology web application and Sheba oncology Facebook page).

### Study population

This trial will enroll breast cancer survivors treated with ET and followed at the Breast Oncology Institute at the Sheba Medical Center. Eligibility criteria (inclusion and exclusion criteria) are detailed in **Table 1**. Potentially eligible participants will be identified and recruited to the study by the medical team during regular clinic visits or via database search and phone calls by the clinical study coordinator (SC). Information leaflets and a poster describing the study design and contact information will be available at the institute's reception and waiting area. Additionally, a video explaining the study and its aims will be shown on screens at the institute's reception and waiting area and will be sent to potential participants (<https://youtu.be/kxrqONj3KGM>). All participants will assign informed consent.

**Table 1: Eligibility criteria**

| Inclusion Criteria                                                                                                                                              | Exclusion Criteria                                                                                   |
|-----------------------------------------------------------------------------------------------------------------------------------------------------------------|------------------------------------------------------------------------------------------------------|
| Female patients                                                                                                                                                 | Oral Antibiotics/antifungal use in the previous one month to profiling stage *                       |
| Age $\geq 18$ and $\leq 80$                                                                                                                                     | Known Diagnosis of diabetes or the use of anti-diabetic and/or weight-loss medication                |
| Diagnosis of stage 1-3 HR+ breast cancer, who underwent surgery                                                                                                 | BMI<18.5                                                                                             |
| At least 60 days after last non-endocrine oncology treatments (i.e. definitive surgery, radiation or chemotherapy – whichever is last) if these were indicated. | Patients under another diet regime and/or a dietitian consultation/ clinical study                   |
| Adjuvant endocrine therapy (either Tamoxifen or Aromatase inhibitor +/- GNRH agonists) taken for at least 30 days but no more than 24 months.                   | Pregnancy, breast feeding                                                                            |
| Willing to operate a smartphone application                                                                                                                     | HIV carriers, Cushing syndrome, Chronic Kidney Disease, acromegaly, hyperthyroidism, liver cirrhosis |
|                                                                                                                                                                 | Known diagnosis of psychiatric disorders (Schizophrenia, Bipolar Disorder)                           |
|                                                                                                                                                                 | Known diagnosis of IBD (inflammatory bowel diseases)                                                 |
|                                                                                                                                                                 | Patients that underwent Bariatric surgery                                                            |
|                                                                                                                                                                 | Known Alcohol or substance abuse                                                                     |

1  
2  
3 \*Patients will be offered to join the study at a later point  
4

## 5 **Study Procedures and Intervention**

6

### 7 ICF signed (wk -8 to -4)

8  
9

10 Eligible participants will be invited to sign an informed consent at the oncologic clinic in  
11 Sheba medical center (as shown in **Figure 1**).  
12  
13

### 14 Profiling stage (wk -6 to -3)

15

16 Consenting patients will proceed to the profiling stage. During this stage they will  
17 undergo the following procedures:  
18  
19

- 20 21 22 23 24 25 26 27 28 29 30 31 32 33 34 35 36 37 38 39 40 41 42 43 44 45 46 47 48 49 50 51 52 53 54 55 56 57 58 59 60  
23 1. Meeting with the SC and completion of questionnaires detailing relevant  
24 medical background, nutritional habits and lifestyle activities. Questionnaires  
25 will be filled online using the REDCap (27) software (a secure web application  
26 for managing online surveys and clinical trials).  
27  
28 2. Participants will provide blood samples after a night fast (12 hours) for  
29 complete blood count and blood chemistry, including liver function, lipid  
30 profiling, Fasting Plasma Glucose (FPG) and HbA1c. LH, FSH and Estradiol will  
31 be measured only in pre-menopausal patients. Participants will provide urine  
32 sample for estradiol derivatives for future exploratory analyses.  
33  
34 3. Anthropometrics measurements, including weight, height, waist and hip  
35 circumference will be taken at this meeting.  
36  
37 4. Stool sample: Patients will receive a designated stool kit (Genotek OMR200) to  
38 collect stool at home. The SC will instruct them how to provide the stool  
39 samples and will ask to return this kit during the following week for further  
40 processing of the microbiome data. Microbiome sequenced data are essential  
41 for the algorithm predictions, thus stool sample is obligatory for participation  
42 in the study.  
43  
44 5. Continuous glucose monitoring (CGM) connection: Patients will be connected  
45 to a CGM (Abbott Freestyle LibrePro) for 2 weeks. The CGM kit includes a  
46 sensor affixed to the back of the arm that continuously monitors glucose levels  
47 in the interstitial fluid, translates and records blood glucose levels.



- 1
  - 2
  - 3
  - 4
  - 5
  - 6
  - 7
  - 8
  - 9
  - 10
  - 11
  - 12
  - 13
  - 14
  - 15
  - 16
  - 17
  - 18
  - 19
  - 20
  - 21
  - 22
  - 23
  - 24
  - 25
  - 26
  - 27
  - 28
  - 29
  - 30
  - 31
  - 32
  - 33
  - 34
  - 35
  - 36
  - 37
  - 38
  - 39
  - 40
  - 41
  - 42
  - 43
  - 44
  - 45
  - 46
  - 47
  - 48
  - 49
  - 50
  - 51
  - 52
  - 53
  - 54
  - 55
  - 56
  - 57
  - 58
  - 59
  - 60
6. Food diary: Patients will be instructed to download the study dedicated smartphone application ('personalized nutrition project') for food logging. They will log in real-time their food intake, physical activities, sleep duration and quality and special events. During the profiling period, patients will be asked to follow their regular dietary and lifestyle habits (see examples of logging activities in **Figure 2A**). All participants will receive a registration code and their data will be anonymized.
7. Data collected during the profiling period, including microbiome, anthropometrics, blood parameters and questionnaires will be analyzed and used by the PPT algorithm to provide personal dietary recommendations for each participant.

### Randomization

After completion of the profiling stage patients will be randomly assigned to one of two arms of the study by one programmer from the trial personnel who had no contact with participants. Approximately 100 subjects will be assigned to each arm using a blinded randomization algorithm and the following stratification factors: (1) menopausal status at study entry (post/pre) (2) received/not received chemotherapy prior to study entry (3) ET type (Tamoxifen/Aromatase inhibitor) (4) Breast Cancer stage at diagnosis and (5) BMI above/below 27. Notably, we only used the stratification factors to minimize differences between groups in the allocation process and did not analyze the data according to the stratification factors. Patients and part of the study team (oncologists and study coordinators), excluding the dietitian, will be blinded to the study arm assigned. At the end of intervention, dietary assignment was revealed, and participants were asked to continue following their respective diets for 6 additional months.

### Recommendation meeting (Day 0)

Upon menus construction, patients from both arms will be invited to a recommendations meeting (hereafter 'day-0') with the dietitians. Patients will receive general information regarding their menu and will be instructed to consume and log

1  
2  
3 their meals according to it. In order to ensure accurate logging the dietitians will  
4 schedule an online follow up two weeks after 'day-0'. Anthropometrics  
5 measurements, including weight, hip and waist circumference, taken at this meeting  
6 will be used as baseline measurements.  
7  
8  
9

#### 10 Follow up Meetings (Mo +1 up to Mo +5)

11  
12 All patients will participate in monthly follow-up meetings with a dietitian (total of 6  
13 meetings) in order to evaluate their compliance to the dietary recommendations they  
14 received and provide additional advice if needed. Anthropometric measurements  
15 (weight, hip and waist circumference) will be taken at each time point. Furthermore,  
16 patients will be asked to fill a follow-up questionnaire and report any changes within  
17 their lifestyle and treatment. At the beginning of Month 4 of the intervention period,  
18 patients will be offered to be reconnected to CGM for two weeks (optional). At the  
19 monthly meeting before the end of intervention patients will receive a stool kit, to be  
20 returned at the end of intervention meeting.  
21  
22  
23  
24  
25  
26  
27  
28  
29  
30

#### 31 End of intervention (Mo +6)

32  
33 At the end of the 6-month intervention period, patients will be invited to a meeting in  
34 which anthropometrics measurement will be taken, as well as urine, blood and stool  
35 samples. Additionally, participants will be connected to CGM for 2 weeks (mandatory)  
36 for the third time (Figure 1). When patients return CGM they will be unblinded to their  
37 assigned intervention arm by the study dietitian.  
38  
39  
40  
41  
42  
43

#### 44 Long term follow up (Mo +12)

45  
46 At 12-month time point, patients will be invited to a follow up meeting and will be  
47 asked to fill follow-up questionnaires, including food frequency questionnaire.  
48 Anthropometric measurements and a 3-day food diary on the study app will be  
49 recorded. Patients will receive the menu of the other study arm and will be offered to  
50 follow either one of the diets. Long-term clinical follow-up information will be  
51 collected from the electronic medical records twice yearly for treatment adherence,  
52 recurrence and survival calculation purposes, for a period of up to five years post  
53 randomization.  
54  
55  
56  
57  
58  
59  
60

## Menus construction

Before randomization, menus will be constructed for each patient and will be adjusted for patients' caloric target and clinical data. The menu construction flow is presented in **Figure 2B**.

## Meal bank (list)

The menus provided to patients in this study are constructed from a meal bank that we previously generated(26), with over 2,000 meals representative of the Israeli typical diet and with a variety of different food combinations. We divided the meals in the meal bank into four meal types (breakfast, lunch, dinner and snacks) and labeled them according to meal categories (dairy; meat; fish etc.) in order to generate menus according to patients' personal preferences.

## Caloric target calculation

In order to provide the patients with diets that support their energetic needs and meet the recommendations for weight loss in people with overweight or obesity, the daily caloric target for each patient (in both arms) will be calculated as an average between:

1. Estimated Energy Requirements (EER) calculated with the use of the Mifflin equation for Resting Energy Expenditure (REE), using their weight, height, age and gender, and multiplied by Physical Activity (PA) factor, based on the level of PA that the person performs on a regular basis (28).
2. Energy expenditure assessed by Basal Metabolic Rate (BMR) value measured by body composition analyzer (Tanita). The result from this equation will be divided by 0.7 (as REE represents ~70% of total energy expenditure).
3. Average daily caloric intake obtained from the patients' dietary records during the profiling stage, to account for the subject's dietary habits prior to the intervention.

1  
2  
3 Furthermore, for individuals with BMI>25 a total of 500Kcal will be reduced from their  
4 calculated caloric target, but not less than 1200 calories/day, to allow weight loss  
5 according to common recommendations for weight loss (29,30).  
6  
7  
8

## 9 **Diets**

### 10 *Mediterranean-style (MED) diet*

11  
12  
13 In this arm we included meals that were scored by four external dietitians according  
14 to the Mediterranean-style dietary recommendations. Meals were binary scored as  
15 recommended (=1) or not recommended (=0) and we applied scores 1 to 5 to all  
16 meals, depending on how many dietitians marked the meal as recommended or not.  
17 The diet is based on recommended foods such as vegetables, fruits, legumes, whole  
18 grain products, unsaturated fats such as olive oil and nuts, fish, poultry and low-fat  
19 dairy products. Consumption of red meat, high fat dairy products, processed foods  
20 and sweet pastries, was discouraged as part of the diet. Additionally, menus in this  
21 arm were designed with the following target for daily macronutrient composition: 45-  
22 65% of calories from carbohydrates; 15-20% from protein; and 20-35% from fat, with  
23 up to 10% from saturated fat. Menus include only meals that received scores 1 and 2.  
24 Participants will be encouraged to consult with the dietitian regarding meals that may  
25 not appear in the constructed menu.  
26  
27  
28  
29  
30  
31  
32  
33  
34  
35  
36  
37  
38  
39

### 40 *Personalized Postprandial-glucose-response Targeting (PPT) diet*

41  
42  
43 In this arm, dietary recommendations will be based on the algorithm predictions of  
44 the postprandial glucose responses(25), shown to improve glycemic control and  
45 metabolic health in healthy individuals or in individuals with prediabetes and  
46 diabetes(26,31). Notably, these interventions were not caloric restricted as in the  
47 current study. Among the features used to predict PPGR to meals were  
48 anthropometrics, blood tests (FPG, HbA1c% and Hemoglobin), lifestyle features  
49 derived from questionnaires, microbiome (abundances of species estimated by  
50 MetaPhlan2 and meal features (macro- and micronutrient composition) were used  
51 (see Supplementary table 1 for the full list). Since no events around the meal were  
52  
53  
54  
55  
56  
57  
58  
59  
60

1  
2  
3 used for prediction, trained predictor could predict response for any profiled  
4 participant to any given meal.  
5  
6  
7

8 All logged meals will be scored from 1-5 based on a unique scoring method that we  
9 developed and tested in previous studies, and study participants will be asked to  
10 consume only meals with score 1 or 2. Importantly, the PPT diet, by definition, was  
11 not aimed to have a predetermined macronutrient distribution, In contrast to the  
12 Med-diet  
13  
14  
15  
16  
17  
18  
19  
20

### 21 **Adherence to the study recommendations**

22  
23 The adherence to the prescribed diets during the intervention will be evaluated by the  
24 dietitian by a close monitoring of the patients' self-recorded dietary intake in the  
25 logging application, as well as by monthly electronic follow-up questionnaires that  
26 participants will be asked to fill out. In order to encourage dietary adherence and self-  
27 monitoring, we will generate a bi-weekly semi-automatic feedback reports that will  
28 include composite grades on a scale of 0-100 (from worse to best) for diet  
29 composition, calorie intake and dietary fiber intake separately, for the entire two-  
30 week period (**Figure 2C**).  
31  
32  
33  
34  
35  
36  
37  
38

- 39 • *MED-diet composition grade*: indicates how well the participant sticks to the  
40 dietary recommendations based on the MED approach including Carbohydrate  
41 (as % of daily caloric intake), fats in general (as % of daily caloric intake) and  
42 specifically saturated fat intake below and above 10% of caloric intake. Dietary  
43 fiber intake per each of 1000 kCal per day will be also calculated as part of the  
44 score.  
45  
46
- 47 • *PPT-diet composition grade*: indicates how well the participant sticks to  
48 predictor-based meal scores. Each meal score was assigned with a grade as  
49 follows: meal score 1=grade 100; meal score 2=80; meal score 3=50; meal  
50 score 4=25; meal score 5=0. The grades are averaged calorie-wise (with food  
51 energy trimmed to be within (100,500) kcal interval) -  $\sum \text{kcal}(i) \cdot \text{grade}(i)$ . For  
52 example, if a participant eats three meals: 600 kcal of meal score 2, 1000 kcal  
53  
54  
55  
56  
57  
58  
59  
60

of meal score 5 and 80 kcal of meal score 1, feedback grade would be:  
 $(500*80+500*0+100*100) / (500+500+100) = 45$ . If too few (100 by default) calories are logged (overall), we did not compute a score.

- *Calories grade*: indicates how well the participant sticks to the prescribed caloric target. When caloric intake deviates within 15% of caloric target (CT) the applied grade is 100; when caloric intake deviation exceeds 60% of CT the applied grade is 0; when caloric intake deviation is between 15% and 60%, a linear penalty is applied to the grade depending on the deviation.
- *Dietary fiber grade*: indicates if participants consumed the recommended amount of dietary fibers (set to 14 gram for every 1000 kcal/day for both arms) from the diet at the referred time. When fiber intake in grams per day reaches the recommended amount, or higher the applied grade is 100 and when it is below the recommended amount a linear penalty is applied to the grade.

In addition to grades, feedback reports also included a list of recommended meals and non-recommended meals (by meal score) to highlight the best and worst meals consumed on that time period (as logged by the participant). The best and worst meals lists will be generated systematically and be reviewed by a dietitian from the study team.

## STATISTICAL CONSIDERATION

### Sample size determination

To estimate the required sample size we performed power analysis, using an unpaired t-test assuming normal distribution of the primary outcome (weight change), estimating the effect size based on the results of different studies describing controlled diet intervention aimed at weight control. Our goal is to detect a difference of at least 2 kg in net weight loss/gain (kg) between control group and experimental group. Based on the study of Shai et al. (32), the standard deviation of weight loss is 4.2 and the projected sample size with alpha of 0.05 and power of 0.8, with an estimated dropout rate of 10%, is 107 people for each arm totaling 214 individuals.

### **Primary, secondary and exploratory endpoint analysis**

All statistical analyses will be performed using Python 2.7. Continuous variables will be presented as mean±SD and dichotomous/categorical variables as proportions. The normality of the distribution of continuous variables will be tested by the Kolmogorov-Smirnov test. If normality will be rejected, non-parametric tests will be used. To test the association between continuous variables with normal distribution, the Pearson correlation coefficient will be performed and to test associations between continuous variables which do not distribute normally or for ordinal variables, the Spearman correlation coefficient will be used. To compare parameters for continuous variables in two time points, the paired-samples t-test will be performed (or Wilcoxon test for non-normally distributed variables), in dichotomous/categorical variables the McNemar test will be performed. To compare continuous variables in a number of time points ANOVA with repeated measures will be used. For comparison of dichotomous/categorical variables in the number of time points the Cochran's Q test will be performed. P values < 0.05 will be considered significant.

### **Data Acquisition, Storage and Analysis**

All samples will be stored at the Breast Cancer Translational Research laboratory at Sheba Medical Center. The blood and urine samples will be stored at -80°C and bacterial DNA samples will be stored at -20°C. The samples will be encoded with no identifying information. Identifying details and codes will be kept in an encrypted file stored at Sheba medical center. Encoded stool samples will be transferred to the Weizmann Institute of science. There, samples will be processed for bacterial DNA processing. All clinical data will be coded. Data will be transferred using the REDcap server and stored on Weizmann servers behind a protected firewall and be accessible only to the study team. Samples will be stored for up to 10 years. All future use of stool and blood samples will be subjected to IRB approval.

## **Ethics and dissemination**

The study has been approved by the Sheba medical center Institutional Review Board (IRB 5725-18) and the Weizmann institute of science Institutional Review Board. The findings of this study will be published in a peer reviewed publication. De-identified individual participant data and applicable supporting clinical trial documents will be available upon request for 12 months after publication.

## **CURRENT STATUS**

Enrollment and recruitment initiated on July 2019. To date (February 2022), 120 participants have been recruited, out of them 60 completed the 6-month intervention period including 38 participants who completed the 12-month time point.

## **DISCUSSION**

Dietary interventions are the first-line treatment for weight management within breast cancer survivors and have beneficial results. Yet, the ability to maintain these outcomes is questionable and require further research(11,33,34). In this trial, we aim to assess the effect of a PPT diet on weight maintenance as compared to Mediterranean-style diet in early stage HR+ breast cancer patients, taking ET.

This study has several strengths and limitations. Advantages of this study design include a comprehensive profiling of each participant, which allow us to better understand participants' metabolic baseline and to assess the effect of the dietary changes. Additionally, the continuous food logging by the study patients using a designated smartphone app can provide us with insights on the patients' compliance to the dietary recommendations in both arms. However, this may limit the study population to individuals who are able to work with smartphone application on a daily basis. Furthermore, the study participants are being closely followed by a dietitian from the study team who monitor their food intake and meet them on a monthly basis in order to increase compliance during the first 6-months. However, on the long term, without intensive monitoring, the feasibility of the PPT diet and the ability to follow the diet recommendations should be investigated. Notably, Ben-Yacov et al. (26), reported that prediabetes individuals following PPT diet were able to maintain the



1  
2  
3 results during 12-month follow up as compared to those who followed the MED diet.  
4  
5 Additionally, as a novel tool, the algorithm is not available for general use which makes  
6  
7 it difficult to replicate the intervention. Nevertheless, we do publish the full list of  
8  
9 features we use to generate the menus, based on personal and microbiome data  
10  
11 (Supplementary table 1).  
12

13  
14 Lastly, microbiome composition and pathways were recently associated with weight  
15  
16 changes and metabolic health parameters, as well as with risk for breast cancer  
17  
18 diagnosis and recurrence (35). This may allow us to further explore whether gut  
19  
20 microbiome composition and pathways have a predictive role in weight management,  
21  
22 metabolic health parameters, glycemic control and even disease recurrence on the  
23  
24 next 5 years after the intervention within breast cancer patients, although for disease  
25  
26 recurrence differences the sample size may not be large enough.

27  
28 Taken together, our rich dataset including deep phenotyping of each patient may  
29  
30 allow us to deeply investigate associations between clinical and Omic data to DFS in  
31  
32 early stage HR+ breast cancer patients and may pave the way to larger studies.

### 33 **FUNDING**

34  
35  
36 This work is supported by Seerave foundation (grant number 713067). This funding  
37  
38 source had no role in the design of this study and will not have any role during its  
39  
40 execution, analyses, interpretation of the data, or decision to submit results.  
41  
42

### 43 **AUTHOR CONTRIBUTIONS**

44  
45 MR, MD and AW conceived the study and designed the intervention. MR and MD  
46  
47 wrote the manuscript. AG is responsible for directing the computational aspects of the  
48  
49 study. DK is responsible for the feedback reports and summary reports being sent to  
50  
51 participants. MBG, DMS and YV coordinate participants' recruitment and  
52  
53 management throughout the intervention and follow-up. AW developed the protocols  
54  
55 and directed and performed the microbiome sample sequencing with the help of MLP.  
56  
57 ES and ENG conceived the study, designed the intervention and wrote the manuscript.  
58  
59 All authors read and approved the final manuscript.  
60

## COMPETING INTEREST STATEMENT

ENG reports Honoraria and Consulting fees from Pfizer, Novartis, Roche Eli-lilly and AstraZeneca. ES reports scientific consultant fees from Day Two Inc. No pharmaceutical manufacturers or other companies from the industry contributed to the planning, design, or conduct of the trial. No other potential competing interest are relevant to this article were reported.

For peer review only

**BIBLIOGRAPHY**

1. Vance V, Mourtzakis M, McCargar L, Hanning R. Weight gain in breast cancer survivors: prevalence, pattern and health consequences. *Obes Rev*. 2011 Apr;12(4):282–294.
2. Goodwin PJ, Ennis M, Pritchard KI, McCready D, Koo J, Sidlofsky S, et al. Adjuvant treatment and onset of menopause predict weight gain after breast cancer diagnosis. *J Clin Oncol*. 1999 Jan;17(1):120–129.
3. Ginzac A, Thivat É, Mouret-Reynier M-A, Dubray-Longeras P, Van Praagh I, Passildas J, et al. Weight evolution during endocrine therapy for breast cancer in postmenopausal patients: effect of initial fat mass percentage and previous adjuvant treatments. *Clin Breast Cancer*. 2018 Oct;18(5):e1093–e1102.
4. Raghavendra A, Sinha AK, Valle-Goffin J, Shen Y, Tripathy D, Barcenas CH. Determinants of Weight Gain During Adjuvant Endocrine Therapy and Association of Such Weight Gain With Recurrence in Long-term Breast Cancer Survivors. *Clin Breast Cancer*. 2018;18(1):e7–e13.
5. White AJ, Nichols HB, Bradshaw PT, Sandler DP. Overall and central adiposity and breast cancer risk in the Sister Study. *Cancer*. 2015 Oct 15;121(20):3700–3708.
6. Nyrop KA, Williams GR, Muss HB, Shachar SS. Weight gain during adjuvant endocrine treatment for early-stage breast cancer: What is the evidence? *Breast Cancer Res Treat*. 2016 Jun 24;158(2):203–217.
7. Zhu Q-L, Xu W-H, Tao M-H. Biomarkers of the metabolic syndrome and breast cancer prognosis. *Cancers (Basel)*. 2010 Apr 28;2(2):721–739.
8. Franzoi MA, Agostinetti E, Perachino M, Del Mastro L, de Azambuja E, Vaz-Luis I, et al. Evidence-based approaches for the management of side-effects of adjuvant endocrine therapy in patients with breast cancer. *Lancet Oncol*. 2021 Jul;22(7):e303–e313.
9. Caan BJ, Emond JA, Natarajan L, Castillo A, Gunderson EP, Habel L, et al. Post-diagnosis weight gain and breast cancer recurrence in women with early stage breast cancer. *Breast Cancer Res Treat*. 2006 Sep;99(1):47–57.
10. Playdon MC, Bracken MB, Sanft TB, Ligibel JA, Harrigan M, Irwin ML. Weight Gain After Breast Cancer Diagnosis and All-Cause Mortality: Systematic Review and Meta-Analysis. *J Natl Cancer Inst*. 2015 Dec;107(12):dju275.
11. Shaikh H, Bradhurst P, Ma LX, Tan SYC, Egger SJ, Vardy JL. Body weight management in overweight and obese breast cancer survivors. *Cochrane Database Syst Rev*. 2020 Dec 11;12:CD012110.

12. Abu-Saad K, Endevelt R, Goldsmith R, Shimony T, Nitsan L, Shahar DR, et al. Adaptation and predictive utility of a Mediterranean diet screener score. *Clin Nutr*. 2019 Dec;38(6):2928–2935.
13. Negrati M, Razza C, Biasini C, Di Nunzio C, Vancini A, Dall’Asta M, et al. Mediterranean Diet Affects Blood Circulating Lipid-Soluble Micronutrients and Inflammatory Biomarkers in a Cohort of Breast Cancer Survivors: Results from the SETA Study. *Nutrients*. 2021 Sep 30;13(10).
14. Di Maso M, Dal Maso L, Augustin LSA, Puppo A, Falcini F, Stocco C, et al. Adherence to the Mediterranean Diet and Mortality after Breast Cancer. *Nutrients*. 2020 Nov 27;12(12).
15. Braakhuis A, Campion P, Bishop K. The effects of dietary nutrition education on weight and health biomarkers in breast cancer survivors. *Med Sci (Basel)*. 2017 Jun 2;5(2).
16. Plottel CS, Blaser MJ. Microbiome and malignancy. *Cell Host Microbe*. 2011 Oct 20;10(4):324–335.
17. Erdman SE, Poutahidis T. Gut bacteria and cancer. *Biochim Biophys Acta*. 2015 Aug;1856(1):86–90.
18. Vrieze A, Holleman F, Zoetendal EG, de Vos WM, Hoekstra JBL, Nieuwdorp M. The environment within: how gut microbiota may influence metabolism and body composition. *Diabetologia*. 2010 Apr;53(4):606–613.
19. Shulzhenko N, Morgun A, Hsiao W, Battle M, Yao M, Gavrilova O, et al. Crosstalk between B lymphocytes, microbiota and the intestinal epithelium governs immunity versus metabolism in the gut. *Nat Med*. 2011 Nov 20;17(12):1585–1593.
20. Shapira I, Sultan K, Lee A, Taioli E. Evolving concepts: how diet and the intestinal microbiome act as modulators of breast malignancy. *ISRN Oncol*. 2013 Sep 25;2013:693920.
21. Goedert JJ, Jones G, Hua X, Xu X, Yu G, Flores R, et al. Investigation of the association between the fecal microbiota and breast cancer in postmenopausal women: a population-based case-control pilot study. *J Natl Cancer Inst*. 2015 Aug;107(8).
22. Menni C, Jackson MA, Pallister T, Steves CJ, Spector TD, Valdes AM. Gut microbiome diversity and high-fibre intake are related to lower long-term weight gain. *Int J Obes*. 2017 Jul;41(7):1099–1105.
23. Thaiss CA, Itav S, Rothschild D, Meijer MT, Levy M, Moresi C, et al. Persistent microbiome alterations modulate the rate of post-dieting weight regain. *Nature*. 2016 Dec 22;540(7634):544–551.

- 1
  - 2
  - 3
  - 4
  - 5
  - 6
  - 7
  - 8
  - 9
  - 10
  - 11
  - 12
  - 13
  - 14
  - 15
  - 16
  - 17
  - 18
  - 19
  - 20
  - 21
  - 22
  - 23
  - 24
  - 25
  - 26
  - 27
  - 28
  - 29
  - 30
  - 31
  - 32
  - 33
  - 34
  - 35
  - 36
  - 37
  - 38
  - 39
  - 40
  - 41
  - 42
  - 43
  - 44
  - 45
  - 46
  - 47
  - 48
  - 49
  - 50
  - 51
  - 52
  - 53
  - 54
  - 55
  - 56
  - 57
  - 58
  - 59
  - 60
24. Key TJ, Appleby PN, Reeves GK, Roddam A, Dorgan JF, Longcope C, et al. Body mass index, serum sex hormones, and breast cancer risk in postmenopausal women. *J Natl Cancer Inst.* 2003 Aug 20;95(16):1218–1226.
25. Zeevi D, Korem T, Zmora N, Israeli D, Rothschild D, Weinberger A, et al. Personalized nutrition by prediction of glycemic responses. *Cell.* 2015 Nov 19;163(5):1079–1094.
26. Ben-Yacov O, Godneva A, Rein M, Shilo S, Kolobkov D, Koren N, et al. Personalized Postprandial Glucose Response-Targeting Diet Versus Mediterranean Diet for Glycemic Control in Prediabetes. *Diabetes Care.* 2021 Sep;44(9):1980–1991.
27. Harris PA, Taylor R, Minor BL, Elliott V, Fernandez M, O’Neal L, et al. The REDCap consortium: Building an international community of software platform partners. *J Biomed Inform.* 2019 Jul;95:103208.
28. Mifflin MD, St Jeor ST, Hill LA, Scott BJ, Daugherty SA, Koh YO. A new predictive equation for resting energy expenditure in healthy individuals. *Am J Clin Nutr.* 1990 Feb;51(2):241–247.
29. Jensen MD, Ryan DH, Apovian CM, Ard JD, Comuzzie AG, Donato KA, et al. 2013 AHA/ACC/TOS guideline for the management of overweight and obesity in adults: a report of the American College of Cardiology/American Heart Association Task Force on Practice Guidelines and The Obesity Society. *J Am Coll Cardiol.* 2014 Jul 1;63(25 Pt B):2985–3023.
30. Limon-Miro AT, Lopez-Teros V, Astiazaran-Garcia H. Dietary guidelines for breast cancer patients: A critical review. *Adv Nutr.* 2017 Jul 14;8(4):613–623.
31. Rein M, Ben-Yacov O, Godneva A, Shilo S, Zmora N, Kolobkov D, et al. Effects of personalized diets by prediction of glycemic responses on glycemic control and metabolic health in newly diagnosed T2DM: a randomized dietary intervention pilot trial. *BMC Med.* 2022 Feb 9;20(1):56.
32. Shai I, Schwarzfuchs D, Henkin Y, Shahar DR, Witkow S, Greenberg I, et al. Weight loss with a low-carbohydrate, Mediterranean, or low-fat diet. *N Engl J Med.* 2008 Jul 17;359(3):229–241.
33. Picon-Ruiz M, Morata-Tarifa C, Valle-Goffin JJ, Friedman ER, Slingerland JM. Obesity and adverse breast cancer risk and outcome: Mechanistic insights and strategies for intervention. *CA Cancer J Clin.* 2017 Sep;67(5):378–397.
34. Anbari AB, Deroche CB, Armer JM. Body mass index trends and quality of life from breast cancer diagnosis through seven years’ survivorship. *World J Clin Oncol.* 2019 Dec 24;10(12):382–390.
35. Uzan-Yulzari A, Morr M, Tareef-Nabwani H, Ziv O, Magid-Neriya D, Armoni R, et al. The intestinal microbiome, weight, and metabolic changes in women

1  
2  
3 treated by adjuvant chemotherapy for breast and gynecological malignancies.  
4  
5 BMC Med. 2020 Oct 21;18(1):281.  
6  
7  
8  
9  
10  
11  
12  
13  
14  
15  
16  
17  
18  
19  
20  
21  
22  
23  
24  
25  
26  
27  
28  
29  
30  
31  
32  
33  
34  
35  
36  
37  
38  
39  
40  
41  
42  
43  
44  
45  
46  
47  
48  
49  
50  
51  
52  
53  
54  
55  
56  
57  
58  
59  
60

For peer review only

1  
2  
3 **FIGURES LEGEND**  
4

5 **Figure 1. An illustration of the study design**  
6  
7  
8

9  
10 **Figure 2. Study application and menus construction. (A)** The food logging application,  
11 examples of logging activities and information available on the application. **(B)** Menus  
12 construction flow. **(C)** An example of the bi-weekly feedback report that will be sent to  
13 participants.  
14  
15  
16  
17  
18  
19  
20  
21  
22  
23  
24  
25  
26  
27  
28  
29  
30  
31  
32  
33  
34  
35  
36  
37  
38  
39  
40  
41  
42  
43  
44  
45  
46  
47  
48  
49  
50  
51  
52  
53  
54  
55  
56  
57  
58  
59  
60

For peer review only



Figure 1. An illustration of the study design

254x190mm (96 x 96 DPI)



A



BMJ Open

B



C

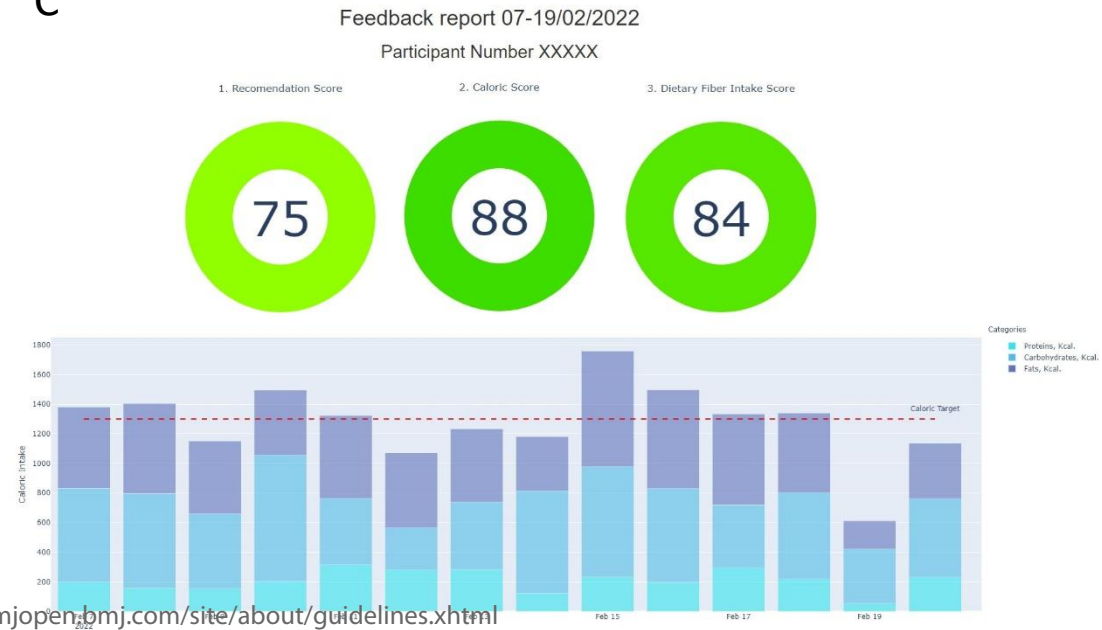

# Reporting checklist for protocol of a clinical trial.

Based on the SPIRIT guidelines.

|                                                         |                     | Reporting Item                                                                                                                                                                                                    | Page Number                      |
|---------------------------------------------------------|---------------------|-------------------------------------------------------------------------------------------------------------------------------------------------------------------------------------------------------------------|----------------------------------|
| <b>Administrative information</b>                       |                     |                                                                                                                                                                                                                   |                                  |
| Title                                                   | <a href="#">#1</a>  | Descriptive title identifying the study design, population, interventions, and, if applicable, trial acronym                                                                                                      | 1                                |
| Trial registration                                      | <a href="#">#2a</a> | Trial identifier and registry name. If not yet registered, name of intended registry                                                                                                                              | 2                                |
| Trial registration: data set                            | <a href="#">#2b</a> | All items from the World Health Organization Trial Registration Data Set                                                                                                                                          | n/a, We added the MOH identifier |
| Protocol version                                        | <a href="#">#3</a>  | Date and version identifier                                                                                                                                                                                       | Protocol attached                |
| Funding                                                 | <a href="#">#4</a>  | Sources and types of financial, material, and other support                                                                                                                                                       | 16                               |
| Roles and responsibilities: contributorship             | <a href="#">#5a</a> | Names, affiliations, and roles of protocol contributors                                                                                                                                                           | 16-17                            |
| Roles and responsibilities: sponsor contact information | <a href="#">#5b</a> | Name and contact information for the trial sponsor                                                                                                                                                                | 16                               |
| Roles and responsibilities: sponsor and funder          | <a href="#">#5c</a> | Role of study sponsor and funders, if any, in study design; collection, management, analysis, and interpretation of data; writing of the report; and the decision to submit the report for publication, including | 16                               |

whether they will have ultimate authority over any of these activities

|    |                           |                     |                                                           |
|----|---------------------------|---------------------|-----------------------------------------------------------|
| 1  |                           |                     |                                                           |
| 2  |                           |                     |                                                           |
| 3  |                           |                     |                                                           |
| 4  | Roles and                 | <a href="#">#5d</a> | Composition, roles, and responsibilities of the           |
| 5  | responsibilities:         |                     | coordinating centre, steering committee, endpoint         |
| 6  | committees                |                     | adjudication committee, data management team, and         |
| 7  |                           |                     | other individuals or groups overseeing the trial, if      |
| 8  |                           |                     | applicable (see Item 21a for data monitoring              |
| 9  |                           |                     | committee)                                                |
| 10 |                           |                     |                                                           |
| 11 |                           |                     |                                                           |
| 12 |                           |                     |                                                           |
| 13 |                           |                     |                                                           |
| 14 | <b>Introduction</b>       |                     |                                                           |
| 15 |                           |                     |                                                           |
| 16 | Background and            | <a href="#">#6a</a> | Description of research question and justification for    |
| 17 | rationale                 |                     | undertaking the trial, including summary of relevant      |
| 18 |                           |                     | studies (published and unpublished) examining             |
| 19 |                           |                     | benefits and harms for each intervention                  |
| 20 |                           |                     |                                                           |
| 21 |                           |                     |                                                           |
| 22 |                           |                     |                                                           |
| 23 | Background and            | <a href="#">#6b</a> | Explanation for choice of comparators                     |
| 24 | rationale: choice of      |                     |                                                           |
| 25 | comparators               |                     |                                                           |
| 26 |                           |                     |                                                           |
| 27 |                           |                     |                                                           |
| 28 | Objectives                | <a href="#">#7</a>  | Specific objectives or hypotheses                         |
| 29 |                           |                     |                                                           |
| 30 |                           |                     |                                                           |
| 31 | Trial design              | <a href="#">#8</a>  | Description of trial design including type of trial (eg,  |
| 32 |                           |                     | parallel group, crossover, factorial, single group),      |
| 33 |                           |                     | allocation ratio, and framework (eg, superiority,         |
| 34 |                           |                     | equivalence, non-inferiority, exploratory)                |
| 35 |                           |                     |                                                           |
| 36 |                           |                     |                                                           |
| 37 |                           |                     |                                                           |
| 38 | <b>Methods:</b>           |                     |                                                           |
| 39 | <b>Participants,</b>      |                     |                                                           |
| 40 | <b>interventions, and</b> |                     |                                                           |
| 41 | <b>outcomes</b>           |                     |                                                           |
| 42 |                           |                     |                                                           |
| 43 |                           |                     |                                                           |
| 44 | Study setting             | <a href="#">#9</a>  | Description of study settings (eg, community clinic,      |
| 45 |                           |                     | academic hospital) and list of countries where data       |
| 46 |                           |                     | will be collected. Reference to where list of study sites |
| 47 |                           |                     | can be obtained                                           |
| 48 |                           |                     |                                                           |
| 49 |                           |                     |                                                           |
| 50 |                           |                     |                                                           |
| 51 | Eligibility criteria      | <a href="#">#10</a> | Inclusion and exclusion criteria for participants. If     |
| 52 |                           |                     | applicable, eligibility criteria for study centres and    |
| 53 |                           |                     | individuals who will perform the interventions (eg,       |
| 54 |                           |                     | surgeons, psychotherapists)                               |
| 55 |                           |                     |                                                           |
| 56 |                           |                     |                                                           |
| 57 |                           |                     |                                                           |
| 58 |                           |                     |                                                           |
| 59 |                           |                     |                                                           |
| 60 |                           |                     |                                                           |

|    |                      |                      |                                                         |            |
|----|----------------------|----------------------|---------------------------------------------------------|------------|
| 1  | Interventions:       | <a href="#">#11a</a> | Interventions for each group with sufficient detail to  | 8-11       |
| 2  | description          |                      | allow replication, including how and when they will be  |            |
| 3  |                      |                      | administered                                            |            |
| 4  |                      |                      |                                                         |            |
| 5  |                      |                      |                                                         |            |
| 6  | Interventions:       | <a href="#">#11b</a> | Criteria for discontinuing or modifying allocated       | 6-7        |
| 7  | modifications        |                      | interventions for a given trial participant (eg, drug   |            |
| 8  |                      |                      | dose change in response to harms, participant           |            |
| 9  |                      |                      | request, or improving / worsening disease)              |            |
| 10 |                      |                      |                                                         |            |
| 11 |                      |                      |                                                         |            |
| 12 |                      |                      |                                                         |            |
| 13 | Interventions:       | <a href="#">#11c</a> | Strategies to improve adherence to intervention         | 12-13;     |
| 14 | adherence            |                      | protocols, and any procedures for monitoring            | Figure 2c  |
| 15 |                      |                      | adherence (eg, drug tablet return; laboratory tests)    |            |
| 16 |                      |                      |                                                         |            |
| 17 |                      |                      |                                                         |            |
| 18 | Interventions:       | <a href="#">#11d</a> | Relevant concomitant care and interventions that are    | Table 1,   |
| 19 | concomitant care     |                      | permitted or prohibited during the trial                | page 7     |
| 20 |                      |                      |                                                         |            |
| 21 |                      |                      |                                                         |            |
| 22 | Outcomes             | <a href="#">#12</a>  | Primary, secondary, and other outcomes, including       | 14, Box 1  |
| 23 |                      |                      | the specific measurement variable (eg, systolic blood   |            |
| 24 |                      |                      | pressure), analysis metric (eg, change from baseline,   |            |
| 25 |                      |                      | final value, time to event), method of aggregation (eg, |            |
| 26 |                      |                      | median, proportion), and time point for each outcome.   |            |
| 27 |                      |                      | Explanation of the clinical relevance of chosen         |            |
| 28 |                      |                      | efficacy and harm outcomes is strongly recommended      |            |
| 29 |                      |                      |                                                         |            |
| 30 |                      |                      |                                                         |            |
| 31 |                      |                      |                                                         |            |
| 32 |                      |                      |                                                         |            |
| 33 | Participant timeline | <a href="#">#13</a>  | Time schedule of enrolment, interventions (including    | Figure 1 ; |
| 34 |                      |                      | any run-ins and washouts), assessments, and visits      | 8-12       |
| 35 |                      |                      | for participants. A schematic diagram is highly         |            |
| 36 |                      |                      | recommended (see Figure)                                |            |
| 37 |                      |                      |                                                         |            |
| 38 |                      |                      |                                                         |            |
| 39 |                      |                      |                                                         |            |
| 40 | Sample size          | <a href="#">#14</a>  | Estimated number of participants needed to achieve      | 12         |
| 41 |                      |                      | study objectives and how it was determined, including   |            |
| 42 |                      |                      | clinical and statistical assumptions supporting any     |            |
| 43 |                      |                      | sample size calculations                                |            |
| 44 |                      |                      |                                                         |            |
| 45 |                      |                      |                                                         |            |
| 46 |                      |                      |                                                         |            |
| 47 | Recruitment          | <a href="#">#15</a>  | Strategies for achieving adequate participant           | 6          |
| 48 |                      |                      | enrolment to reach target sample size                   |            |
| 49 |                      |                      |                                                         |            |

51 **Methods:**  
52 **Assignment of**  
53 **interventions (for**  
54 **controlled trials)**

|    |                        |                      |                                                              |           |
|----|------------------------|----------------------|--------------------------------------------------------------|-----------|
| 1  | Allocation: sequence   | <a href="#">#16a</a> | Method of generating the allocation sequence (eg,            | 11        |
| 2  | generation             |                      | computer-generated random numbers), and list of any          |           |
| 3  |                        |                      | factors for stratification. To reduce predictability of a    |           |
| 4  |                        |                      | random sequence, details of any planned restriction          |           |
| 5  |                        |                      | (eg, blocking) should be provided in a separate              |           |
| 6  |                        |                      | document that is unavailable to those who enrol              |           |
| 7  |                        |                      | participants or assign interventions                         |           |
| 8  |                        |                      |                                                              |           |
| 9  |                        |                      |                                                              |           |
| 10 |                        |                      |                                                              |           |
| 11 |                        |                      |                                                              |           |
| 12 | Allocation             | <a href="#">#16b</a> | Mechanism of implementing the allocation sequence            | 11        |
| 13 | concealment            |                      | (eg, central telephone; sequentially numbered,               |           |
| 14 | mechanism              |                      | opaque, sealed envelopes), describing any steps to           |           |
| 15 |                        |                      | conceal the sequence until interventions are assigned        |           |
| 16 |                        |                      |                                                              |           |
| 17 |                        |                      |                                                              |           |
| 18 |                        |                      |                                                              |           |
| 19 | Allocation:            | <a href="#">#16c</a> | Who will generate the allocation sequence, who will          | 11        |
| 20 | implementation         |                      | enrol participants, and who will assign participants to      |           |
| 21 |                        |                      | interventions                                                |           |
| 22 |                        |                      |                                                              |           |
| 23 |                        |                      |                                                              |           |
| 24 | Blinding (masking)     | <a href="#">#17a</a> | Who will be blinded after assignment to interventions        | 11        |
| 25 |                        |                      | (eg, trial participants, care providers, outcome             |           |
| 26 |                        |                      | assessors, data analysts), and how                           |           |
| 27 |                        |                      |                                                              |           |
| 28 |                        |                      |                                                              |           |
| 29 |                        |                      |                                                              |           |
| 30 | Blinding (masking):    | <a href="#">#17b</a> | If blinded, circumstances under which unblinding is          | 12        |
| 31 | emergency              |                      | permissible, and procedure for revealing a                   |           |
| 32 | unblinding             |                      | participant's allocated intervention during the trial        |           |
| 33 |                        |                      |                                                              |           |
| 34 |                        |                      |                                                              |           |
| 35 | <b>Methods: Data</b>   |                      |                                                              |           |
| 36 | <b>collection,</b>     |                      |                                                              |           |
| 37 | <b>management, and</b> |                      |                                                              |           |
| 38 | <b>analysis</b>        |                      |                                                              |           |
| 39 |                        |                      |                                                              |           |
| 40 |                        |                      |                                                              |           |
| 41 |                        |                      |                                                              |           |
| 42 | Data collection plan   | <a href="#">#18a</a> | Plans for assessment and collection of outcome,              | 9-11      |
| 43 |                        |                      | baseline, and other trial data, including any related        |           |
| 44 |                        |                      | processes to promote data quality (eg, duplicate             |           |
| 45 |                        |                      | measurements, training of assessors) and a                   |           |
| 46 |                        |                      | description of study instruments (eg, questionnaires,        |           |
| 47 |                        |                      | laboratory tests) along with their reliability and validity, |           |
| 48 |                        |                      | if known. Reference to where data collection forms           |           |
| 49 |                        |                      | can be found, if not in the protocol                         |           |
| 50 |                        |                      |                                                              |           |
| 51 |                        |                      |                                                              |           |
| 52 |                        |                      |                                                              |           |
| 53 |                        |                      |                                                              |           |
| 54 |                        |                      |                                                              |           |
| 55 | Data collection plan:  | <a href="#">#18b</a> | Plans to promote participant retention and complete          | Figure 2A |
| 56 | retention              |                      | follow-up, including list of any outcome data to be          |           |
| 57 |                        |                      |                                                              |           |
| 58 |                        |                      |                                                              |           |
| 59 |                        |                      |                                                              |           |
| 60 |                        |                      |                                                              |           |

collected for participants who discontinue or deviate from intervention protocols

|    |                                                  |                      |                                                                                                                                                                                                                                                                                                                                       |
|----|--------------------------------------------------|----------------------|---------------------------------------------------------------------------------------------------------------------------------------------------------------------------------------------------------------------------------------------------------------------------------------------------------------------------------------|
| 1  |                                                  |                      |                                                                                                                                                                                                                                                                                                                                       |
| 2  |                                                  |                      |                                                                                                                                                                                                                                                                                                                                       |
| 3  |                                                  |                      |                                                                                                                                                                                                                                                                                                                                       |
| 4  | Data management                                  | <a href="#">#19</a>  | Plans for data entry, coding, security, and storage, including any related processes to promote data quality (eg, double data entry; range checks for data values). Reference to where details of data management procedures can be found, if not in the protocol                                                                     |
| 5  |                                                  |                      |                                                                                                                                                                                                                                                                                                                                       |
| 6  |                                                  |                      |                                                                                                                                                                                                                                                                                                                                       |
| 7  |                                                  |                      |                                                                                                                                                                                                                                                                                                                                       |
| 8  |                                                  |                      |                                                                                                                                                                                                                                                                                                                                       |
| 9  |                                                  |                      |                                                                                                                                                                                                                                                                                                                                       |
| 10 |                                                  |                      |                                                                                                                                                                                                                                                                                                                                       |
| 11 |                                                  |                      |                                                                                                                                                                                                                                                                                                                                       |
| 12 |                                                  |                      |                                                                                                                                                                                                                                                                                                                                       |
| 13 |                                                  |                      |                                                                                                                                                                                                                                                                                                                                       |
| 14 | Statistics: outcomes                             | <a href="#">#20a</a> | Statistical methods for analysing primary and secondary outcomes. Reference to where other details of the statistical analysis plan can be found, if not in the protocol                                                                                                                                                              |
| 15 |                                                  |                      |                                                                                                                                                                                                                                                                                                                                       |
| 16 |                                                  |                      |                                                                                                                                                                                                                                                                                                                                       |
| 17 |                                                  |                      |                                                                                                                                                                                                                                                                                                                                       |
| 18 |                                                  |                      |                                                                                                                                                                                                                                                                                                                                       |
| 19 |                                                  |                      |                                                                                                                                                                                                                                                                                                                                       |
| 20 |                                                  |                      |                                                                                                                                                                                                                                                                                                                                       |
| 21 | Statistics: additional analyses                  | <a href="#">#20b</a> | Methods for any additional analyses (eg, subgroup and adjusted analyses)                                                                                                                                                                                                                                                              |
| 22 |                                                  |                      |                                                                                                                                                                                                                                                                                                                                       |
| 23 |                                                  |                      |                                                                                                                                                                                                                                                                                                                                       |
| 24 | Statistics: analysis population and missing data | <a href="#">#20c</a> | Definition of analysis population relating to protocol non-adherence (eg, as randomised analysis), and any statistical methods to handle missing data (eg, multiple imputation)                                                                                                                                                       |
| 25 |                                                  |                      |                                                                                                                                                                                                                                                                                                                                       |
| 26 |                                                  |                      |                                                                                                                                                                                                                                                                                                                                       |
| 27 |                                                  |                      |                                                                                                                                                                                                                                                                                                                                       |
| 28 |                                                  |                      |                                                                                                                                                                                                                                                                                                                                       |
| 29 |                                                  |                      |                                                                                                                                                                                                                                                                                                                                       |
| 30 |                                                  |                      |                                                                                                                                                                                                                                                                                                                                       |
| 31 | <b>Methods:</b>                                  |                      |                                                                                                                                                                                                                                                                                                                                       |
| 32 | <b>Monitoring</b>                                |                      |                                                                                                                                                                                                                                                                                                                                       |
| 33 |                                                  |                      |                                                                                                                                                                                                                                                                                                                                       |
| 34 |                                                  |                      |                                                                                                                                                                                                                                                                                                                                       |
| 35 | Data monitoring: formal committee                | <a href="#">#21a</a> | Composition of data monitoring committee (DMC); summary of its role and reporting structure; statement of whether it is independent from the sponsor and competing interests; and reference to where further details about its charter can be found, if not in the protocol. Alternatively, an explanation of why a DMC is not needed |
| 36 |                                                  |                      |                                                                                                                                                                                                                                                                                                                                       |
| 37 |                                                  |                      |                                                                                                                                                                                                                                                                                                                                       |
| 38 |                                                  |                      |                                                                                                                                                                                                                                                                                                                                       |
| 39 |                                                  |                      |                                                                                                                                                                                                                                                                                                                                       |
| 40 |                                                  |                      |                                                                                                                                                                                                                                                                                                                                       |
| 41 |                                                  |                      |                                                                                                                                                                                                                                                                                                                                       |
| 42 |                                                  |                      |                                                                                                                                                                                                                                                                                                                                       |
| 43 |                                                  |                      |                                                                                                                                                                                                                                                                                                                                       |
| 44 |                                                  |                      |                                                                                                                                                                                                                                                                                                                                       |
| 45 |                                                  |                      |                                                                                                                                                                                                                                                                                                                                       |
| 46 | Data monitoring: interim analysis                | <a href="#">#21b</a> | Description of any interim analyses and stopping guidelines, including who will have access to these interim results and make the final decision to terminate the trial                                                                                                                                                               |
| 47 |                                                  |                      |                                                                                                                                                                                                                                                                                                                                       |
| 48 |                                                  |                      |                                                                                                                                                                                                                                                                                                                                       |
| 49 |                                                  |                      |                                                                                                                                                                                                                                                                                                                                       |
| 50 |                                                  |                      |                                                                                                                                                                                                                                                                                                                                       |
| 51 |                                                  |                      |                                                                                                                                                                                                                                                                                                                                       |
| 52 |                                                  |                      |                                                                                                                                                                                                                                                                                                                                       |
| 53 | Harms                                            | <a href="#">#22</a>  | Plans for collecting, assessing, reporting, and managing solicited and spontaneously reported adverse events and other unintended effects of trial interventions or trial conduct                                                                                                                                                     |
| 54 |                                                  |                      |                                                                                                                                                                                                                                                                                                                                       |
| 55 |                                                  |                      |                                                                                                                                                                                                                                                                                                                                       |
| 56 |                                                  |                      |                                                                                                                                                                                                                                                                                                                                       |
| 57 |                                                  |                      |                                                                                                                                                                                                                                                                                                                                       |
| 58 |                                                  |                      |                                                                                                                                                                                                                                                                                                                                       |
| 59 |                                                  |                      |                                                                                                                                                                                                                                                                                                                                       |
| 60 |                                                  |                      |                                                                                                                                                                                                                                                                                                                                       |

|    |                                      |                      |                                                                                                                                                                                                                                    |     |
|----|--------------------------------------|----------------------|------------------------------------------------------------------------------------------------------------------------------------------------------------------------------------------------------------------------------------|-----|
| 1  | Auditing                             | <a href="#">#23</a>  | Frequency and procedures for auditing trial conduct, if any, and whether the process will be independent from investigators and the sponsor                                                                                        | n/a |
| 2  |                                      |                      |                                                                                                                                                                                                                                    |     |
| 3  |                                      |                      |                                                                                                                                                                                                                                    |     |
| 4  |                                      |                      |                                                                                                                                                                                                                                    |     |
| 5  |                                      |                      |                                                                                                                                                                                                                                    |     |
| 6  | <b>Ethics and</b>                    |                      |                                                                                                                                                                                                                                    |     |
| 7  | <b>dissemination</b>                 |                      |                                                                                                                                                                                                                                    |     |
| 8  |                                      |                      |                                                                                                                                                                                                                                    |     |
| 9  |                                      |                      |                                                                                                                                                                                                                                    |     |
| 10 | Research ethics approval             | <a href="#">#24</a>  | Plans for seeking research ethics committee / institutional review board (REC / IRB) approval                                                                                                                                      | 2   |
| 11 |                                      |                      |                                                                                                                                                                                                                                    |     |
| 12 |                                      |                      |                                                                                                                                                                                                                                    |     |
| 13 |                                      |                      |                                                                                                                                                                                                                                    |     |
| 14 | Protocol amendments                  | <a href="#">#25</a>  | Plans for communicating important protocol modifications (eg, changes to eligibility criteria, outcomes, analyses) to relevant parties (eg, investigators, REC / IRBs, trial participants, trial registries, journals, regulators) | n/a |
| 15 |                                      |                      |                                                                                                                                                                                                                                    |     |
| 16 |                                      |                      |                                                                                                                                                                                                                                    |     |
| 17 |                                      |                      |                                                                                                                                                                                                                                    |     |
| 18 |                                      |                      |                                                                                                                                                                                                                                    |     |
| 19 |                                      |                      |                                                                                                                                                                                                                                    |     |
| 20 |                                      |                      |                                                                                                                                                                                                                                    |     |
| 21 |                                      |                      |                                                                                                                                                                                                                                    |     |
| 22 | Consent or assent                    | <a href="#">#26a</a> | Who will obtain informed consent or assent from potential trial participants or authorised surrogates, and how (see Item 32)                                                                                                       | 13  |
| 23 |                                      |                      |                                                                                                                                                                                                                                    |     |
| 24 |                                      |                      |                                                                                                                                                                                                                                    |     |
| 25 |                                      |                      |                                                                                                                                                                                                                                    |     |
| 26 |                                      |                      |                                                                                                                                                                                                                                    |     |
| 27 | Consent or assent: ancillary studies | <a href="#">#26b</a> | Additional consent provisions for collection and use of participant data and biological specimens in ancillary studies, if applicable                                                                                              | 15  |
| 28 |                                      |                      |                                                                                                                                                                                                                                    |     |
| 29 |                                      |                      |                                                                                                                                                                                                                                    |     |
| 30 |                                      |                      |                                                                                                                                                                                                                                    |     |
| 31 |                                      |                      |                                                                                                                                                                                                                                    |     |
| 32 |                                      |                      |                                                                                                                                                                                                                                    |     |
| 33 | Confidentiality                      | <a href="#">#27</a>  | How personal information about potential and enrolled participants will be collected, shared, and maintained in order to protect confidentiality before, during, and after the trial                                               | 15  |
| 34 |                                      |                      |                                                                                                                                                                                                                                    |     |
| 35 |                                      |                      |                                                                                                                                                                                                                                    |     |
| 36 |                                      |                      |                                                                                                                                                                                                                                    |     |
| 37 |                                      |                      |                                                                                                                                                                                                                                    |     |
| 38 |                                      |                      |                                                                                                                                                                                                                                    |     |
| 39 |                                      |                      |                                                                                                                                                                                                                                    |     |
| 40 | Declaration of interests             | <a href="#">#28</a>  | Financial and other competing interests for principal investigators for the overall trial and each study site                                                                                                                      | 14  |
| 41 |                                      |                      |                                                                                                                                                                                                                                    |     |
| 42 |                                      |                      |                                                                                                                                                                                                                                    |     |
| 43 | Data access                          | <a href="#">#29</a>  | Statement of who will have access to the final trial dataset, and disclosure of contractual agreements that limit such access for investigators                                                                                    | 15  |
| 44 |                                      |                      |                                                                                                                                                                                                                                    |     |
| 45 |                                      |                      |                                                                                                                                                                                                                                    |     |
| 46 |                                      |                      |                                                                                                                                                                                                                                    |     |
| 47 |                                      |                      |                                                                                                                                                                                                                                    |     |
| 48 |                                      |                      |                                                                                                                                                                                                                                    |     |
| 49 | Ancillary and post trial care        | <a href="#">#30</a>  | Provisions, if any, for ancillary and post-trial care, and for compensation to those who suffer harm from trial participation                                                                                                      | 12  |
| 50 |                                      |                      |                                                                                                                                                                                                                                    |     |
| 51 |                                      |                      |                                                                                                                                                                                                                                    |     |
| 52 |                                      |                      |                                                                                                                                                                                                                                    |     |
| 53 |                                      |                      |                                                                                                                                                                                                                                    |     |
| 54 | Dissemination policy: trial results  | <a href="#">#31a</a> | Plans for investigators and sponsor to communicate trial results to participants, healthcare professionals, the public, and other relevant groups (eg, via publication, reporting in results databases, or other                   | 15  |
| 55 |                                      |                      |                                                                                                                                                                                                                                    |     |
| 56 |                                      |                      |                                                                                                                                                                                                                                    |     |
| 57 |                                      |                      |                                                                                                                                                                                                                                    |     |
| 58 |                                      |                      |                                                                                                                                                                                                                                    |     |
| 59 |                                      |                      |                                                                                                                                                                                                                                    |     |
| 60 |                                      |                      |                                                                                                                                                                                                                                    |     |



data sharing arrangements), including any publication restrictions

Dissemination policy: [#31b](#) Authorship eligibility guidelines and any intended use of professional writers 15

Dissemination policy: [#31c](#) Plans, if any, for granting public access to the full protocol, participant-level dataset, and statistical code 15

## Appendices

Informed consent materials [#32](#) Model consent form and other related documentation given to participants and authorised surrogates n/a

Biological specimens [#33](#) Plans for collection, laboratory evaluation, and storage of biological specimens for genetic or molecular analysis in the current trial and for future use in ancillary studies, if applicable 15

### Notes:

- 2b: n/a, We added the MOH identifier
- 8: 4, figure 1
- 11c: 11; figure 2c
- 12: 12-13, Box 1
- 13: Figure 1 ; 6-9 The SPIRIT Explanation and Elaboration paper is distributed under the terms of the Creative Commons Attribution License CC-BY-NC. This checklist was completed on 24. February 2022 using <https://www.goodreports.org/>, a tool made by the [EQUATOR Network](#) in collaboration with [Penelope.ai](#)



---

The Breast Cancer Personalized Nutrition study (BREACPNT):

*A phase 2 single-blinded randomized study of algorithm-based personalized nutrition intervention compared to standard diet intervention in patients treated with endocrine therapy for early stage, hormone receptor positive breast cancer*

---

Study Protocol

**SMC -5725-18**

February 7, 2019

Version 1.3

Study Principal Investigator:

Dr. Einav Gal-Yam, Breast Oncology Unit, Sheba Medical Center

Study Co-Investigators:

Prof. Eran Segal, Weizmann Institute of Science

Dr. Maya Dadiani, Cancer Research Center, Sheba Medical Center

Dr. Adina Weinberger, Weizmann Institute of Science

Prof. Bella Kaufman, Breast Oncology Unit, Sheba Medical Center

Dr. Keren Levanon, Breast Oncology Unit, Sheba Medical Center

Dr. Rinat Bernstein, Breast Oncology Unit, Sheba Medical Center

Dr. Amit Itay, Breast Oncology Unit, Sheba Medical Center

Dr. Tali Shapira-Rotenberg, Breast Oncology Unit, Sheba Medical Center

Dr. Ofer Globus, Breast Oncology Unit, Sheba Medical Center

## **Table of Contents**

|    |                                                                   |           |
|----|-------------------------------------------------------------------|-----------|
| 1  |                                                                   |           |
| 2  |                                                                   |           |
| 3  |                                                                   |           |
| 4  |                                                                   |           |
| 5  |                                                                   |           |
| 6  | <b>1. PURPOSE .....</b>                                           | <b>3</b>  |
| 7  | <b>2. BACKGROUND .....</b>                                        | <b>3</b>  |
| 8  | <b>3. HYPOTHESIS OBJECTIVES AND ENDPOINTS .....</b>               | <b>5</b>  |
| 9  | <b>4. STUDY DESIGN.....</b>                                       | <b>6</b>  |
| 10 | <b>5. DATA ACQUISITION, STORAGE AND ANALYSIS .....</b>            | <b>12</b> |
| 11 | <b>6. SAFETY ENDPOINTS .....</b>                                  | <b>12</b> |
| 12 | <b>7. STATISTICAL CONSIDERATIONS.....</b>                         | <b>13</b> |
| 13 | <b>8. POSSIBLE BENEFITS .....</b>                                 | <b>13</b> |
| 14 | <b>9. POSSIBLE RISKS AND ANALYSIS OF RISK/BENEFIT RATIO.....</b>  | <b>14</b> |
| 15 | <b>10. RISK MANAGEMENT PROCEDURES .....</b>                       | <b>14</b> |
| 16 | <b>11. SUBJECT PAYMENT/COSTS .....</b>                            | <b>15</b> |
| 17 | <b>12. END OF STUDY DEFINITION.....</b>                           | <b>15</b> |
| 18 | <b>13. CONSENT PROCEDURES .....</b>                               | <b>15</b> |
| 19 | <b>14. PRIVACY.....</b>                                           | <b>15</b> |
| 20 | <b>15. DATA SECURITY .....</b>                                    | <b>15</b> |
| 21 | <b>16. STUDY/INTERVENTION DISCONTINUATION.....</b>                | <b>16</b> |
| 22 | <b>17. MONITORING .....</b>                                       | <b>16</b> |
| 23 | <b>18. RECORD RETENTION.....</b>                                  | <b>17</b> |
| 24 | <b>19. PUBLICATION.....</b>                                       | <b>17</b> |
| 25 | <b>20. FACILITIES AND PERSONNEL .....</b>                         | <b>17</b> |
| 26 | <b>BIBLIOGRAPHY.....</b>                                          | <b>18</b> |
| 27 | <b>APPENDIX 1: SAMPLES COLLECTION, STORAGE AND ANALYSIS .....</b> | <b>21</b> |
| 28 | <b>APPENDIX 2: SCHEDULE OF ACTIVITIES .....</b>                   | <b>22</b> |
| 29 |                                                                   |           |
| 30 |                                                                   |           |
| 31 |                                                                   |           |
| 32 |                                                                   |           |
| 33 |                                                                   |           |
| 34 |                                                                   |           |
| 35 |                                                                   |           |
| 36 |                                                                   |           |
| 37 |                                                                   |           |
| 38 |                                                                   |           |
| 39 |                                                                   |           |
| 40 |                                                                   |           |
| 41 |                                                                   |           |
| 42 |                                                                   |           |
| 43 |                                                                   |           |
| 44 |                                                                   |           |
| 45 |                                                                   |           |
| 46 |                                                                   |           |
| 47 |                                                                   |           |
| 48 |                                                                   |           |
| 49 |                                                                   |           |
| 50 |                                                                   |           |
| 51 |                                                                   |           |
| 52 |                                                                   |           |
| 53 |                                                                   |           |
| 54 |                                                                   |           |
| 55 |                                                                   |           |
| 56 |                                                                   |           |
| 57 |                                                                   |           |
| 58 |                                                                   |           |
| 59 |                                                                   |           |
| 60 |                                                                   |           |

## 1. Purpose

The Breast Cancer Personalized Nutrition (BREACPNT) study will evaluate the effect of a microbiome based personalized diet intervention on control of weight gain, glycemc response, disease outcome and various biomarkers in hormone receptor early breast cancer patients receiving adjuvant endocrine treatment.

## 2. Background

Weight gain is a common incident in breast cancer survivors [1]. As many as 50–96% of women experience weight gain during treatment. Weight gain in breast cancer survivors is complex and influenced by many factors such as tumor type, socio-demographic characteristics, and menopausal status [2,3]. Most breast cancer patients (~75%) are diagnosed with hormone receptor-positive (HR+) tumors and receive endocrine treatment for a period of at least 5 years. Endocrine treatment was identified as a risk factor for weight gain in several studies [2]. Weight gain during endocrine therapy was highest in women who were premenopausal or had previous chemotherapy [4].

Weight gain may decrease adherence to long-term hormonal therapy and increase risk for metabolic syndrome and cardiac disease. Importantly, post-diagnosis weight gain has been implicated as a risk factor in breast cancer recurrence and survival. Hence, weight management for breast cancer survivors is important for increasing adherence to therapy and lowering recurrence risk [5].

The essential role of the gut microbiota in modulating immune and metabolic functions in health and disease is increasingly recognized. Dysbiosis, a disruption in the balance of gut bacterial communities, is associated with many conditions [6]. The entire bacteria population in the digestive tract (microbiome) consists of ~1,000 species with a genetic repertoire of ~3 million different genes. The homeostasis of intestinal microbiota can be influenced by internal factors, such as genetic, age-related and hormonal, as well as by external factors, such as nutrition, stress, lifestyle and antibiotics [7]. The microbiome is directly affected by our diet and directly affect the body's response to food [8,9]. Particularly in breast cancer (BC), diet plays an important role in creating a microbiome

1  
2  
3 environment involved in estrogens metabolism [10]. High systemic estrogen levels  
4 contribute to breast cancer risk in postmenopausal women. Estrogen levels in the blood are  
5 regulated in part via enterohepatic recirculation, involving bacterial enzymatic pathways  
6 and deconjugation[11]. Indeed, profiling gut microbiota in postmenopausal breast cancer  
7 patients revealed altered composition and estrogen-independent low diversity of their gut  
8 microbiota compared to healthy controls [12]. Thus, the gut microbial community may  
9 affect estrogen-related breast cancer [13].

10  
11 A recent study linked the gut microbiome diversity to weight gain [14] and microbiome  
12 alterations were found to contribute to post-dieting weight regain [15]. In addition it was  
13 found that the increase in breast cancer risk with increasing BMI among postmenopausal  
14 women is associated with an increase in estrogens, particularly bioavailable estradiol [16].  
15 The Personalized Nutrition Project, conducted at Eran Segal's group in the Weizmann  
16 Institute of Science, recently showed in an unprecedented scale of 800 people that  
17 individuals vary greatly in their glycemic response to the same food [17]. Most importantly,  
18 it emphasized the involvement of functional microbial pathways and bacterial taxa in host  
19 glucose metabolism. This unique dataset yielded an algorithm capable of accurately  
20 predicting personalized postprandial glycemic response (PPGR) to arbitrary meals. The  
21 algorithm's predictions are based on many personal measurements, including blood tests,  
22 personal lifestyle and gut bacteria profiles.

23  
24 Continuing studies demonstrate that short-term dietary interventions change the  
25 microbiome and are beneficial to the host in maintaining glucose levels. Moreover, Low  
26 glycemic index (GI) diets may be important in weight management [18]. In a small-scale  
27 pilot study using this algorithm, personally tailoring dietary interventions to healthy and  
28 pre-diabetic people, showed a significantly improved PPGRs accompanied by consistent  
29 alterations to the gut microbiota (personal communication) . These results suggest that  
30 individually tailored dietary interventions help maintain normal blood glucose levels and  
31 influence microbiome diversity, which, in turn, can control weight changes.  
32  
33  
34  
35  
36  
37  
38  
39  
40  
41  
42  
43  
44  
45  
46  
47  
48  
49  
50  
51  
52  
53  
54  
55  
56  
57  
58  
59  
60

### 3. Hypothesis Objectives and Endpoints

#### Study Hypothesis

Algorithm based personalized diet will be superior to standard low fat diet for controlling weight gain and glycemic response in breast cancer patients treated with endocrine therapy.

#### *Primary Objective*

To evaluate the efficacy of a personalized diet compared to a standard low fat diet to control body mass as measured by changes in body mass.

Endpoint: Body weight changes will be defined as the net body weight gained/lost in the 6 months' intervention period.

#### *Secondary Objective*

1. To evaluate the efficacy of the personalized diet compared to a standard low fat diet to control glycemic response.

*Endpoint:* glycemic response control measured by the area under the glucose curve (AUC) during continuous glucose monitoring (CGM) period.

#### *Exploratory objective*

1. Evaluate disease outcomes as measured by disease free survival, Breast cancer recurrence in study subjects. Endpoint: 5 years Disease free survival (DFS), 5 years Breast cancer specific recurrence.
2. To investigate microbiome composition and modulation during the diet intervention period and assess if there are differences in modulations between the personalized diets as compared to the standard diet.
3. Investigate the mutual effects of gut microbiome and blood metabolites during the diet intervention period and search for possible biomarkers for dietary treatment efficacy.
4. Investigate inflammation parameters and immune profiles of patients (lymphocytes, T-cell receptor repertoire, antibodies profiling using phage display libraries) of HR positive patients undergoing intervention and their correlations to microbiome modulations.
5. Test whether patients have better compliance and adherence to algorithm-based personalized diets, compared to standard diets advised for weight control. The compliance to the diets will be measured by: Compliance questionnaire, 3-day dietary log, Number of study meetings attended.
6. Test whether HR-positive breast cancer patients have better adherence to hormonal treatment following weight-control diets. This compliance will be tested for 5 years post treatment.

### 4. Study Design

This is a phase 2 randomized trial in hormone receptor positive breast cancer patients receiving adjuvant endocrine therapy. Figure 1 illustrates the study schedule.

200 HR+ breast cancer patients, eligible for adjuvant endocrine therapy will be recruited to the study. Upon recruitment, subjects will provide a stool sample for microbiome analysis and will undergo continuous glucose monitoring for 2 weeks. Thereafter, patients will be randomly assigned in a 1:1 ratio to receive a personalized diet recommendation or a standard low-fat diet for 6 months. The algorithm is based on patients' microbiome analyses and glucose monitoring results. Patients will be monitored by continuous glucose monitoring (CGM) at least 2 times during the 6 months' intervention period. At the end of the 6 months' period patients will undergo a second course of CGM for 2 weeks and provide a second stool sample for microbiome analysis. Patient clinical records will be followed 2-3 times yearly for 5 years for DFS and BC recurrence.

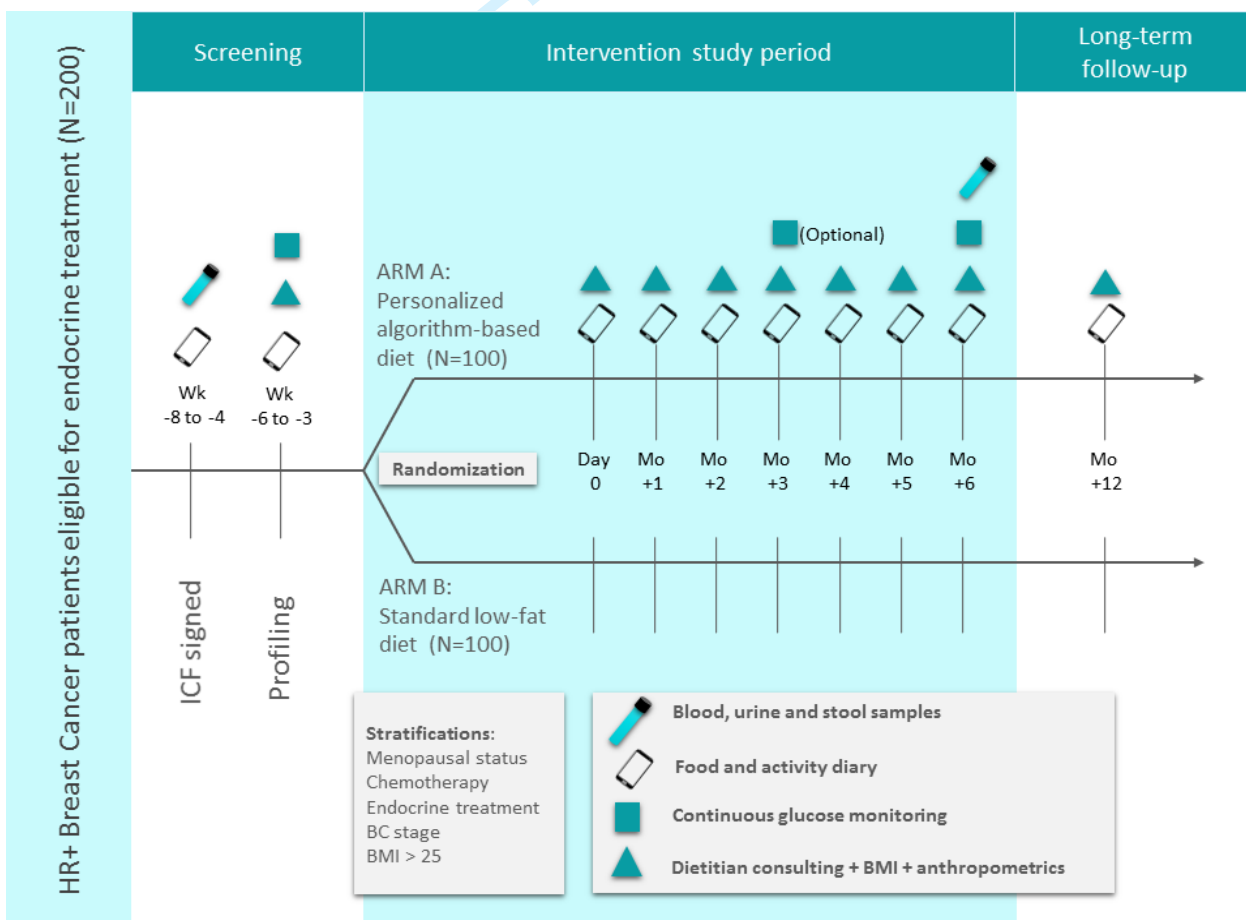

Figure 1: Study design and schedule

1  
2  
3  
4  
5 Inclusion Criteria:  
6

- 7
- 8 • Female patients, Age 18-70
  - 9 • Patients diagnosed with stage 1-3 breast cancer, who underwent surgery, have  
10 finished their neo/adjuvant chemotherapy and radiotherapy if these were indicated  
11 and are treated with adjuvant endocrine therapy (either Tamoxifen or Aromatase  
12 inhibitor +/- GNRH agonists).
  - 13 • Patients are at least 60 days after finishing their last non-endocrine oncology  
14 treatment (i.e. definitive surgery, radiation or chemotherapy – whichever is last),  
15 have received at least 30 days of endocrine therapy (tamoxifen or aromatase  
16 inhibitor) but no more than 24 months.
  - 17 • Patients treated with neoadjuvant endocrine therapy are eligible provided they had  
18 undergone surgery, are at least 60 days post their last non endocrine therapy  
19 (definitive surgery or radiation and chemotherapy, if these were indicated), are  
20 continuing their endocrine therapy but did not receive more than 24 months post-  
21 surgery.
  - 22 • Are willing to work with smartphone application
- 23  
24  
25  
26  
27

28 Exclusion Criteria:  
29

- 30
- 31 • Oral Antibiotics/antifungal use in the previous 3 months to profiling stage (these  
32 patients will be able to join the study at a later point)
  - 33 • Use of anti-diabetic and/or weight-loss medication
  - 34 • BMI<18.5
  - 35 • People under another diet regime and/or a dietitian consultation/another study?
  - 36 • Pregnancy, breast feeding
  - 37 • HIV carriers, Cushing syndrome, Chronic Kidney Disease, acromegaly,  
38 hyperthyroidism, liver cirrhosis
  - 39 • Psychiatric disorders (Schizophrenia, Bipolar Disorder)
  - 40 • Known diagnosis of IBD (inflammatory bowel diseases)
  - 41 • Patients that underwent Bariatric surgery
  - 42 • Known Alcohol or substance abuse
  - 43 • Known Diagnosis of diabetes
- 44  
45  
46  
47  
48  
49  
50  
51  
52  
53  
54  
55  
56  
57  
58  
59  
60

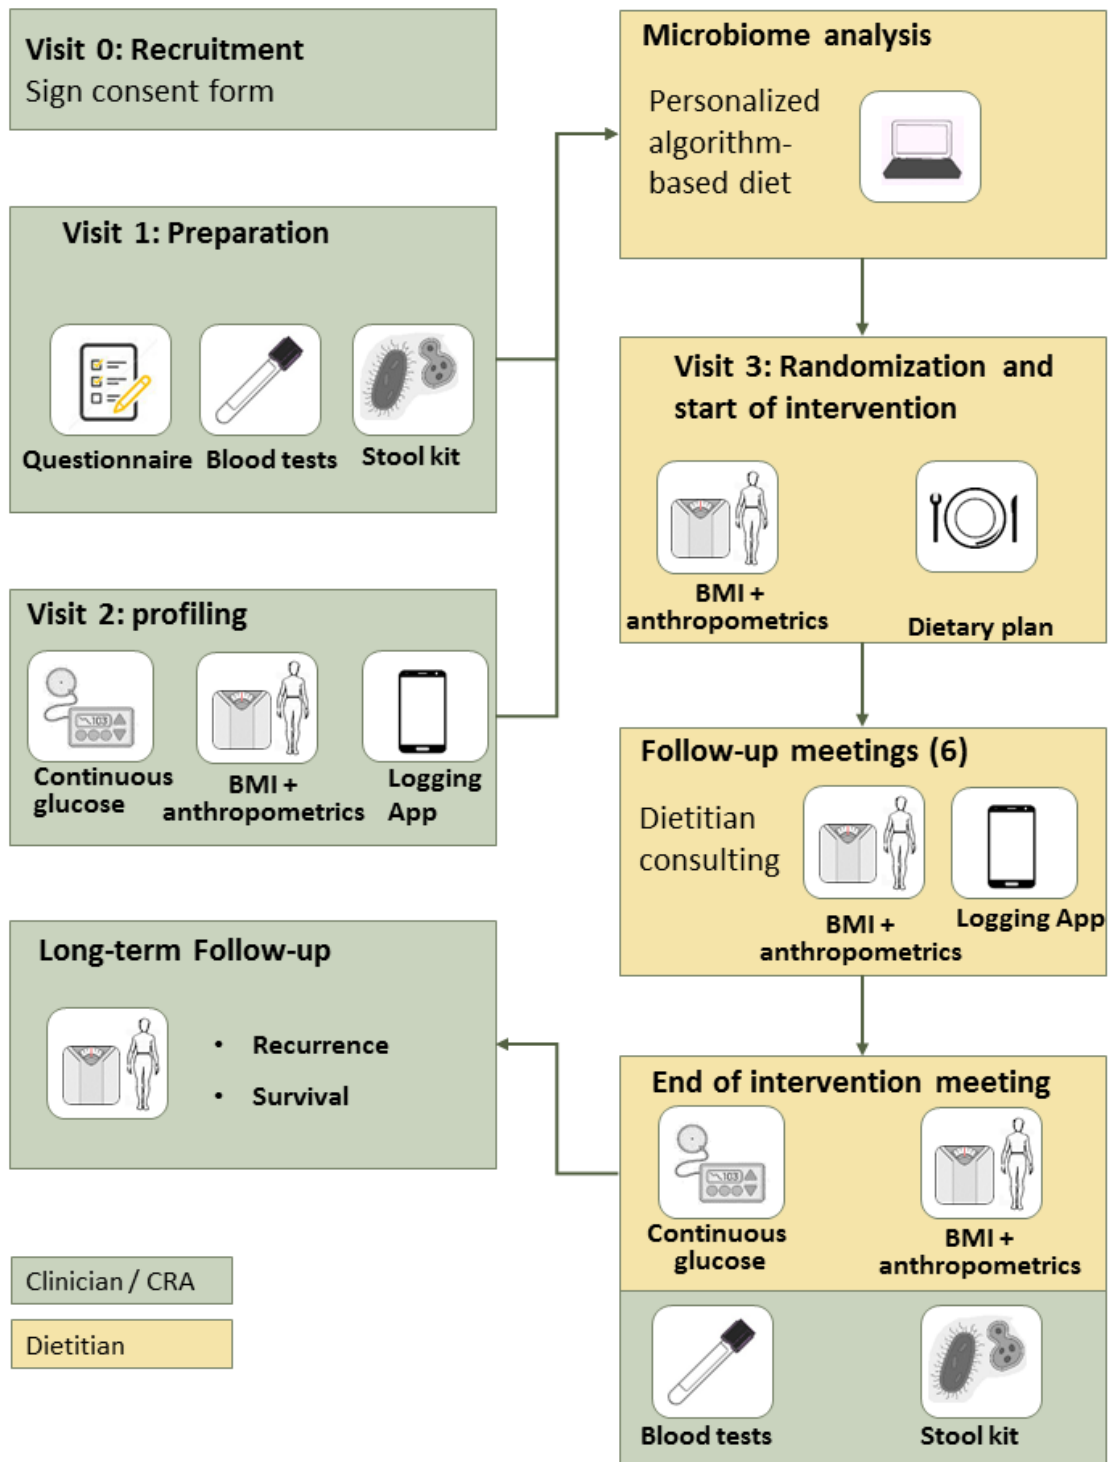

Figure 2: Study scheme



### Patient Recruitment

Breast cancer patients will be recruited to the study through their regular clinic visit at the Breast Oncology Unit at Sheba Medical Center. Patients eligible for the study will sign an informed consent. This recruitment process will be ongoing until the designated number of study patients is reached.

### Screening and profiling stage (-3 Months to Day -1 )

During this stage consenting patients will:

1. Meet a study coordinator and complete questionnaires regarding their medical background, nutritional habits and lifestyle activities (filled online using the REDcap software, using a dedicated tablet computer). Patients will provide blood samples for CBC, blood chemistry including liver function, lipid profiling, HBA1C, TSH, CRP, LH FSH and future exploratory analyses, and urine samples for estradiol derivatives. All patients will receive a code from the software and their data will be anonymized.
2. Patients will be asked to log a three-day food diary using a designated mobile phone application.
3. Patients will receive a designated stool kit to collect the stool sample at home. In the next meeting (profiling stage) patients will return the stool sample which will be used for microbiota profiling.
4. Meet with a certified dietitian to build a menu for the "profiling period" based on the three-day food diary of dietary habits provided by the patient. This meeting will include anthropometrics measurements (weight, height, waist and hip circumference) and connection to the glucose measurement device (Abbott Freestyle Libre). The CGM kit includes a sensor affixed to the back of the arm, which continuously monitors glucose levels in the interstitial fluid, translates and records blood glucose levels. Patients will be connected to a CGM for two weeks and will be asked to follow their diet plan as given to them by the dietitian, according to their regular habits and lifestyle. During the two weeks of connection patients will be instructed to use a dedicated application, in which they will

1  
2  
3 log in real-time their food diary, exercise, sleep, wake up, special events. Patients will  
4 return the CGM kit via a courier service from the patients' home upon measurement  
5 completion. The stool sample will be processed for microbiome profiling. The resulting  
6 data and data provided by the CGM kit will be analyzed to provide a personal profile for  
7 each patient.  
8  
9

### 10 11 12 Randomization and Intervention

13  
14  
15 Following the profiling stage: patients will be randomly assigned to one of two arms of the  
16 study. Approximately 100 subjects will be randomized to each arm. Patients will be  
17 blinded to the arm to which they were assigned. Randomization will be done by a computer  
18 program, taking into account the following stratification factors:  
19  
20

- 21 1. Menopausal status at study entry
- 22 2. Previous chemotherapy
- 23 3. Endocrine treatment type (Tamoxifen/Aromatase inhibitor)
- 24 4. Breast Cancer stage
- 25 5. BMI above/below 25

26  
27  
28  
29  
30  
31  
32 The intervention arm will be an 'algorithm-based' arm in which patients will receive  
33 personally tailored dietary recommendations. The prediction algorithm is based on gradient  
34 boosting regression model and is capable of accurately predicting personalized  
35 postprandial glycemc responses to arbitrary meals based on microbiome, CGM data from  
36 the profiling period (two weeks of CGM connection data) and other clinical data such as  
37 blood tests and lifestyle features. This model predicts PPGRs using the sum of thousands  
38 of different decision trees. Trees are inferred sequentially, with each tree trained on the  
39 residual of all previous trees and making a small contribution to the overall prediction. The  
40 features within each tree are selected by an inference procedure from a pool of 187 features  
41 representing meal content (e.g., energy, macronutrients, micronutrients); daily activity  
42 (e.g., meals, exercises, sleep times); blood parameters (e.g., HbA1c%, HDL cholesterol);  
43 CGM-derived features; questionnaires; and microbiome features (metagenomic relative  
44 abundances and KEGG pathways)[17]. The algorithm was developed using a standard  
45 leave-one-out scheme to rank every meal of each participant in the profiling period (i.e.,  
46  
47  
48  
49  
50  
51  
52  
53  
54  
55  
56  
57

1  
2  
3 the PPGR to each predicted meal will be hidden from the predictor). The model was  
4 validated in an independently collected 100-person cohort . [17]  
5

6 The control arm will receive nutritional recommendations according to the standard Israeli  
7 dietary approach Mediterranean-style low-fat diet. In order to provide patients with diets  
8 that support their energetic needs and meet the recommendations for weight loss in people  
9 with overweight or obesity, the daily caloric target for each patient (in both arms) will be  
10 calculated as average between:  
11  
12  
13  
14

15 1. Estimated Energy Requirements (EER) calculated with the use of Mifflin equation for  
16 Resting Energy Expenditure (REE) [19]. The result from this equation will be divided by  
17 0.7 (as REE represent ~70% of total energy expenditure).  
18

19 2. Average daily caloric intake obtained from patient's log in the app during the profiling  
20 stage. For overweight patients (BMI>25) a total of 500Kcal will be reduced from their  
21 reported caloric intake to allow weight loss as accepted according to the American  
22 Association of Clinical Endocrinologists guidelines.  
23  
24  
25  
26

27 The diet recommendations for both arms will be provided and explained by a certified  
28 dietitian which will meet the patients from both arms at Day 0 and monthly thereafter for  
29 a total of 6 scheduled monthly visits. Weight and other anthropometric measurements  
30 (height, waist and hip circumference) will be taken at this and all following meetings with  
31 the dietitian. Participants will be asked to document their food intake and daily activities  
32 including exercise and sleep using a dedicated smartphone app throughout the intervention  
33 period.  
34  
35  
36  
37  
38  
39

#### 40 Intervention Meetings:

41 Patients from both arms will be invited during the intervention period to monthly follow-  
42 up meetings with a certified dietitian (total of 6 meetings). Meetings will include evaluation  
43 of patients' compliance to the dietary recommendations they received and additional advice  
44 will be provided if needed. During the follow up meetings anthropometric measurements  
45 will be taken (height, weight, hip and waist circumference). We will also follow up on  
46 patients via phone, email, text message, in order to increase compliance. During the  
47 monthly meeting at the beginning of Month 4 of the intervention period patients will be  
48  
49  
50  
51  
52  
53  
54  
55  
56  
57  
58  
59  
60

1  
2  
3 offered to be reconnected to CGM for 2 weeks (optional). Data from CGM connections  
4 will be analyzed at the end of the intervention  
5

#### 6 End of intervention

7  
8 At the end of the 6 months intervention period, patients will be invited to a meeting in  
9 which they will undergo anthropometrics measurement, urine, blood samples and stool  
10 sample. Additionally, patients will be connected to CGM for 2 weeks (mandatory).  
11

12 Patients will be followed up at 12 months following the start of the intervention. They will  
13 attend a follow up meeting with the study coordinator in which BMI, anthropometrics, and  
14 a 3 day food diary will be recorded.  
15

#### 16 Long term follow up

17  
18 Long-term clinical follow-up will be collected from the electronic medical records for  
19 recurrence and survival calculation purposes for a period of up to 5 years post recruitment.  
20  
21  
22  
23  
24  
25

## 26 5. Data Acquisition, Storage and Analysis

27  
28 All samples will be stored at the Breast Cancer translational Research laboratory at Sheba  
29 Medical Center. The samples will be stored at -80C, bacterial DNA samples will be stored  
30 at -20C. The samples will be stored encoded with no identifying information. Identifying  
31 details and codes will be kept in a file stored at Sheba medical center. Encoded stool  
32 samples will be transferred to the Segal laboratory at the Weizmann Institute of science.  
33 There, samples will be processed for bacterial DNA processing. All clinical data will be  
34 coded. Data will be transferred using the REDcap server and stored on Weizmann servers  
35 behind a protected firewall and be accessible only to the study team  
36  
37  
38  
39  
40  
41  
42  
43

#### 44 Future research:

45  
46 Samples will be stored for up to 10 years. All future use of stool and blood samples will  
47 be subject to IRB approval.  
48  
49

## 50 6. Safety Endpoints

51  
52 No safety endpoints planned for this study  
53  
54  
55  
56  
57

## 7. Statistical Considerations

**Sample size determination.** To estimate the required sample size, we performed power analysis while estimating effect size using the results of different studies describing controlled diet intervention aimed at weight control. Our goal is to detect a difference of at least 2 kg in net weight loss/gain (kg) between control group and experimental group. Based on the study of Shai et al. [20], the standard deviation of weight loss is 4.2 and the projected sample size with alpha of 0.05 and power of 0.8, with an estimated dropout rate of 10%, is 107 people for each arm totaling 214 individuals.

**Primary, secondary and exploratory endpoint analysis (brief summary).** All statistical analyses will be performed using Python 2.7. Continuous variables will be presented as mean±SD and dichotomous/categorical variables as proportions. The normality of the distribution of continuous variables will be tested by the Kolmogorov-Smirnov test. If normality will be rejected, non-parametric tests will be used. To test the association between continuous variables with normal distribution, the Pearson correlation coefficient will be performed and to test associations between continuous variables which do not distribute normally or for ordinal variable, the spearman correlation coefficient will be used. To compare parameters for continuous variables in 2 time points the paired-samples t-test will be performed (or Wilcoxon test for non-normally distribute variables), in dichotomous/categorical variables the McNemar test will be performed. To compare continuous variables in a number of time points ANOVA with repeated measures will be used. For comparison of dichotomous or categorical variables in number of time points the Cochran's Q test will be performed. P values < 0.05 will be considered significant.

## 8. Possible Benefits

Patients will receive counseling and close monitoring by a certified dietitian throughout the study, regardless of the research arm to which they were assigned

Patients will have the opportunity to evaluate their blood glucose levels in response to food that they tend to eat, exercise, etc., throughout the CGM connection.

Patients will receive an analysis of their glucose response to the foods that they ate.

1  
2  
3 Patients will have access to different nutritional tools that will be available to them on a  
4 secure website or on their mobile phone (App).  
5  
6

7 At the end of the study all patients will be given access to their personal tailored dietary  
8 recommendations, built for them by the study team based on their personal data, regardless  
9 of the arm they were assigned to during the study.  
10  
11  
12

## 13 9. Possible Risks and Analysis of Risk/Benefit Ratio

14 When blood tests are taken, there is no risk except a slightly discomfort associated with the  
15 prick, hematoma or local infection it the prick area.  
16  
17

18 In order to monitor glucose levels patients will be connected to a continuous glucose  
19 monitor (CGM). The CGM includes a sensor that will be inserted using a small needle into  
20 the body. There is ultra-low risk of inserting the sensor including mild discomfort  
21 associated with inserting the sensor, a local infection in the prick area, a mild redness at  
22 the patch area. We consider this risk to be quite low. Continuous Glucose Monitoring may  
23 reveal a previously undiagnosed diabetes. These patients will be excluded from the trial  
24 and the patient and treating oncologist will be notified to provide appropriate therapy and  
25 inform the patient's general physician.  
26  
27  
28  
29  
30  
31  
32

33 Caloric restriction will be provided only to patients who are overweight or obese (BMI>25)  
34 and not to patients with BMI at the normal range (18.5-25). Patients with BMI lower than  
35 the normal range will be excluded from the study.  
36  
37  
38  
39

## 40 10. Risk Management Procedures

### 41 Confidentiality

42 Patients will be identified by a numerical study ID. Only the designated research staff at  
43 Sheba Medical center will have access to the patient's fully identified medical information.  
44 The information that matches the code to the identifying information will be kept in a  
45 safeguarded database that is password protected.  
46  
47  
48  
49  
50  
51  
52  
53  
54  
55  
56  
57  
58  
59  
60

## 11. Subject Payment/Costs

Subjects will not be directly remunerated for participation in the study. There is no cost to the subject for study participation.

## 12. End of Study definition

It is estimated that accrual will be completed in approximately 24 months  
Time from initiation of intervention to last post intervention meeting – 12 months.  
End of the study is the date of the last visit for the last patient which will be approximately 36 months from first patient intervention

Clinical endpoints will be collected up to 5 years after end of intervention.

## 13. Consent Procedures

Study purpose, methods, materials, risks, benefits, and alternatives will be provided in a detailed description in the consent form and will be discussed with the patient by the investigator or authorized designee. Patients will be told they are free to refuse to participate and may withdraw their consent at any time for any reason. The consent forms will be signed and dated by the patient before his or her participation in the study. The informed consent forms and process shall be documented in the patients' clinical records. A copy of the signed consent form will be provided to the patient.

## 14. Privacy

If patients wish to review or discuss their results this information will be discussed in private consultation with the study team medical personnel.

## 15. Data Security

The collection and processing of personal data from subjects enrolled in this study will be limited to the data needed to investigate this study's hypothesis. Access to identifiable data will be limited to Sheba Medical Center designated personnel; patient level de-identified data will be available only to investigators authorized by the Principal Investigator.

Data files are stored on a password-protected computer/database and will be accessible only to the designated investigators and research staff. Only the research staff will have the link that can match the code to traditional identifying information. The data sets used



1  
2  
3 for analysis will be coded and not contain any traditionally used identifying information  
4 that could be used to identify the patient.  
5  
6  
7

## 8 16. Study/Intervention Discontinuation

9 Patients will be discontinued from study intervention in the following circumstances:

- 10 1. The patient is enrolled in any other clinical trial involving any investigational product  
11 or any other type of medical research judged not to be scientifically or medically  
12 compatible with this study.  
13
- 14 2. Investigator decision: the investigator decides that the patient should be discontinued  
15 from the study or study intervention if the patient, for any reason, requires treatment  
16 with a therapeutic agent that effects study indication/intervention or for medical, safety,  
17 regulatory, or other reasons consistent with applicable laws, regulations, and good  
18 clinical practice (GCP).  
19
- 20 3. Patient decision: If the patient requests to be withdrawn from study intervention but  
21 agrees to stay in the study she will be evaluable for the endpoint if she attended at least  
22 one follow-up meeting post randomization. If the patient wishes to withdraw  
23 participation in the study she can do so at any time and in such a case data and samples  
24 will be destroyed  
25
- 26 4. Disease recurrence.  
27
- 28 5. Discontinuation of Inadvertently Enrolled Patients: If the investigator identifies a  
29 patient who did not meet enrollment criteria and was inadvertently enrolled, a decision  
30 on whether or not the patient may remain on intervention will be made and documented.  
31 Patients will be evaluable for the primary endpoint if they were randomized and  
32 attended at least one follow up meeting post start of intervention.  
33  
34  
35  
36  
37  
38  
39  
40  
41  
42  
43  
44

## 45 17. Monitoring

46 Sheba Medical Center will monitor the study. Source documents will be reviewed to  
47 ensure all subjects have properly signed and dated the informed consent forms. All  
48 information will be reviewed to ensure eligibility criteria as per the protocol, and  
49 supporting source data will be verified.  
50  
51  
52  
53  
54  
55  
56  
57



## 18. Record Retention

Research records with patient identification will be kept for 10 years after study completion. The collected data and related de-identified health information may be kept indefinitely. Record retention will comply with the specific requirements of the Sheba Medical Center IRB. No personal health information will be retained.

## 19. Publication

The results of this research will be presented at meetings or in publication. However, the subject's identity will not be disclosed in those presentations.

## 20. Facilities and Personnel

All study activities will occur within the patient's home and breast cancer institute clinic at Sheba Medical Center. All communications with patients will be through the Sheba Medical Center.

## Bibliography

1. Vance V, Mourtzakis M, McCargar L, Hanning R. Weight gain in breast cancer survivors: prevalence, pattern and health consequences. *Obes Rev*. 2011 Apr;12(4):282–94.
2. Nyrop KA, Williams GR, Muss HB, Shachar SS. Weight gain during adjuvant endocrine treatment for early-stage breast cancer: What is the evidence? *Breast Cancer Res Treat*. 2016;158(2):203–17.
3. Goodwin PJ, Ennis M, Pritchard KI, McCreedy D, Koo J, Sidlofsky S, Trudeau M, Hood N, Redwood S. Adjuvant Treatment and Onset of Menopause Predict Weight Gain After Breast Cancer Diagnosis. *J Clin Oncol*. 1999 Jan 1;17(1):120.
4. Nyrop KA, Deal AM, Lee JT, Muss HB, Choi SK, Wheless A, Carey LA, Shachar SS. Weight gain in hormone receptor-positive (HR+) early-stage breast cancer: is it menopausal status or something else? *Breast Cancer Res Treat*. 2017;
5. Guo Q, Burgess S, Turman C, Bolla MK, Wang Q, Lush M, Abraham J, Aittomäki K, Andrulis IL, Apicella C, Arndt V, Barrdahl M, Benitez J, Berg CD, Blomqvist C, Bojesen SE, Bonanni B, Brand JS, Brenner H, Broeks A, Burwinkel B, Caldas C, Campa D, Canzian F, Chang-Claude J, Chanock SJ, Chin SF, Couch FJ, Cox A, Cross SS, Cybulski C, Czene K, Darabi H, Devilee P, Ryan Diver W, Dunning AM, Earl HM, Eccles DM, Ekici AB, Eriksson M, Evans DG, Fasching PA, Figueroa J, Flesch-Janys D, Flyger H, Gapstur SM, Gaudet MM, Giles GG, Glendon G, Grip M, Gronwald J, Haeberle L, Haiman CA, Hall P, Hamann U, Hankinson S, Hartikainen JM, Hein A, Hiller L, Hogervorst FB, Holleccek B, Hooning MJ, Hoover RN, Humphreys K, Hunter DJ, Hüsing A, Jakubowska A, Jukkola-Vuorinen A, Kaaks R, Kabisch M, Kataja V, Knight JA, Koppert LB, Kosma VM, Kristensen VN, Lambrechts D, Le Marchand L, Li J, Lindblom A, Lindström S, Lissowska J, Lubinski J, Machiela MJ, Mannermaa A, Manoukian S, Margolin S, Marme F, Martens JWM, McLean C, Menéndez P, Milne RL, Mulligan AM, Muranen TA, Nevanlinna H, Neven P, Nielsen SF, Nordestgaard BG, Olson JE, Perez JIA, Peterlongo P, Phillips KA, Poole CJ, Pylkäs K, Radice P, Rahman N, Rüdiger T, Rudolph A, Sawyer EJ, Schumacher F, Seibold P, Seynaeve C, Shah M, Smeets A, Southey MC, Tollenaar RAEM, Tomlinson I, Tsimiklis H, Ulmer HU, Vachon C, van den Ouweland AMW, Van't Veer LJ, Wildiers H, Willett W, Winqvist R, Zamora MP, Chenevix-Trench G, Dörk T, Easton DF, García-Closas M, Kraft P, Hopper JL, Zheng W, Schmidt MK, Pharoah PDP. Body mass index and breast cancer survival: A Mendelian randomization analysis. *Int J Epidemiol*. 2017;46(6):1891–902.
6. Plottel CS, Blaser MJ. Microbiome and malignancy. *Cell Host Microbe*. 2011;10(4):324–35.

- 1
  - 2
  - 3
  - 4
  - 5
  - 6
  - 7
  - 8
  - 9
  - 10
  - 11
  - 12
  - 13
  - 14
  - 15
  - 16
  - 17
  - 18
  - 19
  - 20
  - 21
  - 22
  - 23
  - 24
  - 25
  - 26
  - 27
  - 28
  - 29
  - 30
  - 31
  - 32
  - 33
  - 34
  - 35
  - 36
  - 37
  - 38
  - 39
  - 40
  - 41
  - 42
  - 43
  - 44
  - 45
  - 46
  - 47
  - 48
  - 49
  - 50
  - 51
  - 52
  - 53
  - 54
  - 55
  - 56
  - 57
  - 58
  - 59
  - 60
7. Erdman SE, Poutahidis T. Gut bacteria and cancer. *Biochim Biophys Acta*. 2015;1856(1):86–90.
8. Vrieze A, Holleman F, Zoetendal EG, De Vos WM, Hoekstra JBL, Nieuwdorp M. The environment within: How gut microbiota may influence metabolism and body composition. Vol. 53, *Diabetologia*. 2010. p. 606–13.
9. Shulzhenko N, Morgun A, Hsiao W, Battle M, Yao M, Gavrilova O, Orandle M, Mayer L, Macpherson AJ, McCoy KD, Fraser-Liggett C, Matzinger P. Crosstalk between B lymphocytes, microbiota and the intestinal epithelium governs immunity versus metabolism in the gut. *Nat Med*. 2011;17(12):1585–93.
10. Shapira I, Sultan K, Lee A, Taioli E. Evolving concepts: how diet and the intestinal microbiome act as modulators of breast malignancy. *ISRN Oncol*. 2013;2013(693920):1–10.
11. Flores R, Shi J, Fuhrman B, Xu X, Veenstra TD, Gail MH, Gajer P, Ravel J, Goedert JJ. Fecal microbial determinants of fecal and systemic estrogens and estrogen metabolites: a cross-sectional study. *J Transl Med*. 2012;10:253.
12. Goedert JJ, Jones G, Hua X, Xu X, Yu G, Flores R, Falk RT, Gail MH, Shi J, Ravel J, Feigelson HS. Investigation of the Association Between the Fecal Microbiota and Breast Cancer in Postmenopausal Women: A Population-Based Case-Control Pilot Study. *J Natl Cancer Inst*. 2015;107(8):1–5.
13. Kwa M, Plottel CS, Blaser MJ, Adams S. The Intestinal Microbiome and Estrogen Receptor-Positive Female Breast Cancer. *J Natl Cancer Inst*. 2016;108(8):1–10.
14. Menni C, Jackson MA, Pallister T, Steves CJ, Spector TD, Valdes AM. Gut microbiome diversity and high-fibre intake are related to lower long-term weight gain. *Int J Obes*. 2017;41(7):1099–105.
15. Thaïss CA, Itav S, Rothschild D, Meijer M, Levy M, Moresi C, Dohnalova L, Braverman S, Rozin S, Malitsky S, Dori-Bachash M, Kuperman Y, Biton I, Gertler A, Harmelin A, Shapiro H, Halpern Z, Aharoni A, Segal E, Elinav E. Persistent microbiome alterations modulate the rate of post-dieting weight regain. *Nature*. 2016 Nov;540:544–51.
16. Endogenous Hormones and Breast Cancer Collaborative Group. Body Mass Index, Serum Sex Hormones, and Breast Cancer Risk in Postmenopausal Women. *JNCI J Natl Cancer Inst [Internet]*. 2003;95(16):1218–26. Available from: <http://jnci.oxfordjournals.org/cgi/doi/10.1093/jnci/djg022>
17. Zeevi D, Korem T, Zmora N, Israeli D, Rothschild D, Weinberger A, Ben-Yacov O, Lador D, Avnit-Sagi T, Lotan-Pompan M, Suez J, Mahdi JA, Matot E, Malka G,

1  
2  
3 Kosower N, Rein M, Zilberman-Schapira G, Dohnalova L, Pevsner-Fischer M,  
4 Bikovsky R, Halpern Z, Elinav E, Segal E. Personalized Nutrition by Prediction of  
5 Glycemic Responses. *Cell*. 2015;163(5):1079–94.  
6  
7

- 8 18. Juanola-Falgarona M, Salas-Salvadó J, Ibarrola-Jurado N, Rabassa-Soler A, Díaz-  
9 López A, Guasch-Ferré M, Hernández-Alonso P, Balanza R, Bulló M. Effect of the  
10 glycemic index of the diet on weight loss, modulation of satiety, inflammation,  
11 and other metabolic risk factors: a randomized controlled trial. *Am J Clin Nutr*.  
12 2014;100(1):27–35.  
13  
14  
15 19. Mifflin MD, Jeor STS, Hill LA, Scott BJ, Daugherty SA, Koh YO. A new predictive  
16 equation for resting energy expenditure in healthy individuals. *Am J Clin Nutr*  
17 [Internet]. 1990;51(2):241–7. Available from:  
18 [http://ajcn.nutrition.org/content/51/2/241%5Cnhttp://ajcn.nutrition.org/content](http://ajcn.nutrition.org/content/51/2/241%5Cnhttp://ajcn.nutrition.org/content/51/2/241.abstract%5Cnhttp://www.ncbi.nlm.nih.gov/pubmed/2305711)  
19 [/51/2/241.abstract%5Cnhttp://www.ncbi.nlm.nih.gov/pubmed/2305711](http://ajcn.nutrition.org/content/51/2/241.abstract%5Cnhttp://www.ncbi.nlm.nih.gov/pubmed/2305711)  
20  
21  
22 20. Shai I, Schwarzfuchs D, Henkin Y, Shahar DR, Witkow S, Greenberg I, Golan R,  
23 Fraser D, Bolotin A, Vardi H, Tangi-Rozental O, Zuk-Ramot R, Sarusi B, Brickner D,  
24 Schwartz Z, Sheiner E, Marko R, Katorza E, Thiery J, Fiedler GM, Bluher M,  
25 Stumvoll M, Stampfer MJ. Weight loss with a low-carbohydrate, Mediterranean,  
26 or low-fat diet. *N Engl J Med*. 2008 Jul;359(3):229–41.  
27  
28  
29  
30  
31  
32  
33  
34  
35  
36  
37  
38  
39  
40  
41  
42  
43  
44  
45  
46  
47  
48  
49  
50  
51  
52  
53  
54  
55  
56  
57  
58  
59  
60

## Appendix 1: Samples Collection, Storage and Analysis

Blood: during the study we will collect blood samples 2 times : At the initial screening, and at the end of the intervention, at time points 0 and 6m. Two blood samples will be taken- one sample for immediate analysis and a second sample (blood and plasma) would be stored in deep freeze (-80°C) for future metabolomics testing (blood tests are detailed in schedule of activities table, see Appendix 2).

Stool: Patients will be asked to provide several stool sample at 2 time points throughout the study. Stool samples are required for the study, and will be collected at baseline and at the end of intervention. Stool samples will be stored at Sheba Medical center and transferred to Segal lab at the Weizmann Institute. The samples will be stored encoded with no identifying information. The samples will be stored at -80C, bacterial DNA samples will be stored at -20C. The samples will be stored for 10 years. Identifying details and codes will be kept by the principal investigator and designated personnel. All future use of stool samples will be subject to Helsinki approval.

Urine: urine samples will be taken from every patient at 2 time points, including at the beginning and at the end of the intervention, in order to characterize estradiol derivatives.

## Appendix 2: Schedule of activities

| Trial period                                                                  | Screening Profiling |               | Intervention |    |    |    |    |    | End of treatment |     | Followup                |  |
|-------------------------------------------------------------------------------|---------------------|---------------|--------------|----|----|----|----|----|------------------|-----|-------------------------|--|
|                                                                               | week- 8 to -4       | week- 4 to -3 | Day 0 (M1)   | M2 | M3 | M4 | M5 | M6 | M7               | M12 | Every 6 months (5years) |  |
| Scheduling window                                                             |                     |               |              |    |    |    |    |    |                  |     |                         |  |
| Signed ICF                                                                    | X                   |               |              |    |    |    |    |    |                  |     |                         |  |
| Review of eligibility                                                         | X                   |               |              |    |    |    |    |    |                  |     |                         |  |
| Medical History                                                               | X                   |               |              |    |    |    |    |    |                  |     |                         |  |
| Nutrition/Lifestyle/Medical Questionnaire                                     | X                   |               |              |    |    |    |    |    |                  |     |                         |  |
| Weight                                                                        |                     | X             | X            | X  | X  | X  | X  | X  | X                | X   | X                       |  |
| Height                                                                        |                     | X             | X            | X  | X  | X  | X  | X  | X                | X   | X                       |  |
| Other Anthropometrics                                                         |                     | X             | X            | X  | X  | X  | X  | X  | X                | X   | X                       |  |
| Provision of stool kit                                                        | X                   |               |              |    |    |    |    |    |                  |     |                         |  |
| CBC                                                                           |                     | X             |              |    |    |    |    |    |                  |     |                         |  |
| Blood Chemistry including total serum protein and albumin and fasting glucose |                     | X             |              |    |    |    |    |    |                  |     |                         |  |
| Lipid profiling                                                               |                     | X             |              |    |    |    |    |    |                  |     |                         |  |
| Liver profiling (GGT, Bilirubin, Alkaline Phosphatase, AST,ALT)               |                     | X             |              |    |    |    |    |    |                  |     |                         |  |
| TSH                                                                           |                     | X             |              |    |    |    |    |    |                  |     |                         |  |
| CRP                                                                           |                     | X             |              |    |    |    |    |    |                  |     |                         |  |
| HbA1C                                                                         |                     | X             |              |    |    |    |    |    |                  |     |                         |  |
| Hormonal Profiling (LH, FSH)                                                  |                     | X             |              |    |    |    |    |    |                  |     |                         |  |
| Urinalysis (estradiol derivatives)                                            |                     | X             |              |    |    |    |    |    |                  |     |                         |  |
| Whole blood sample for exploratory analysis                                   |                     | X             |              |    |    |    |    |    |                  |     |                         |  |
| Dietitian Consult                                                             |                     | X             | X            | X  | X  | X  | X  | X  | X                | X   | X                       |  |
| Profiling stage menu                                                          |                     | X             |              |    |    |    |    |    |                  |     |                         |  |
| Food and Activity Diary log in                                                |                     | X             | X            | X  | X  | X  | X  | X  | X                | X   | X                       |  |
| Continuous Glucose Monitoring Connection ( 2 weeks)                           | X                   | X             | X            | X  | X  | X  | X  | X  | X                | X   | X                       |  |
| Survival And Breast Cancer recurrence Follow up                               |                     |               |              |    |    |    |    |    |                  |     | X ( from EMR)           |  |
| Hormonal Treatment Adherence Follow up                                        |                     |               |              |    |    |    |    |    |                  |     | X ( from EMR)           |  |
| Diet Adherence follow up (weekly phone, text or email followup)               | X                   |               | X            | X  | X  | X  | X  | X  | X                | X   | X                       |  |

| <b>Supplementary Table1: Features for Prediction</b> |
|------------------------------------------------------|
| List of features - PPGR predictions                  |
| <b>Blood tests</b>                                   |
| HbA1C%                                               |
| Hemoglobin                                           |
| FastingGlucose                                       |
| <b>Anthropometric (measured at profiling)</b>        |
| BMI                                                  |
| BodyFat                                              |
| Waist                                                |
| Weight                                               |
| Hips                                                 |
| <b>Dietary components of the meal</b>                |
| Alanine_g                                            |
| Alcohol_g                                            |
| Arginine_g                                           |
| Caffeine_mg                                          |
| Calcium_mg                                           |
| Carbohydrate_g                                       |
| Cholesterol_mg                                       |
| Energy_kcal                                          |
| Fructose_g                                           |
| Galactose_g                                          |
| Glucose_g                                            |
| Isoleucine_g                                         |
| Lactose_g                                            |
| Leucine_g                                            |
| Magnesium_mg                                         |
| Maltose_g                                            |
| Niacin_mg                                            |
| Phenylalanine_g                                      |
| Protein_g                                            |
| Sodium_mg                                            |
| Starch_g                                             |
| Sucrose_g                                            |
| SugarsTotal_g                                        |
| Thiamin_mg                                           |
| TotalDietaryFiber_g                                  |
| TotalLipid_g                                         |
| TotalMonounsaturatedFattyAcids_g                     |
| TotalPolyunsaturatedFattyAcids_g                     |
| TotalSaturatedFattyAcids_g                           |
| TotalTransFattyAcids_g                               |
| VitaminC_mg                                          |
| VitaminD_IU                                          |
| VitaminE_mg                                          |
| Water_g                                              |
| Zinc_mg                                              |
| <b>Health questionnaire</b>                          |
| Age                                                  |

|    |                                |
|----|--------------------------------|
| 1  |                                |
| 2  | Currently_smokes               |
| 3  | Evening_Hunger                 |
| 4  | Ever_smoked                    |
| 5  | Gender                         |
| 6  | General_Hunger                 |
| 7  | Is_pregnant                    |
| 8  | Midday_Hunger                  |
| 9  | Morning_Hunger                 |
| 10 | Physical_activity_-_freq       |
| 11 | Physical_activity_-_mins       |
| 12 | Regular_defecation             |
| 13 | Sleep_quality                  |
| 14 | Stress                         |
| 15 | Work_activity                  |
| 16 |                                |
| 17 | <b>Microbiome features</b>     |
| 18 | s_Acidaminococcus_unclassified |
| 19 | s_Adlercreutzia_equolifaciens  |
| 20 | s_Akkermansia_muciniphila      |
| 21 | s_Alistipes_finegoldii         |
| 22 | s_Alistipes_indistinctus       |
| 23 | s_Alistipes_nderdonkii         |
| 24 | s_Alistipes_putredinis         |
| 25 | s_Alistipes_senegalensis       |
| 26 | s_Alistipes_shahii             |
| 27 | s_Anaerostipes_hadrus          |
| 28 | s_Anaerotruncus_unclassified   |
| 29 | s_Bacteroidales_bacterium_ph8  |
| 30 | s_Bacteroides_caccae           |
| 31 | s_Bacteroides_cellulosilyticus |
| 32 | s_Bacteroides_clarus           |
| 33 | s_Bacteroides_dorei            |
| 34 | s_Bacteroides_eggerthii        |
| 35 | s_Bacteroides_faecis           |
| 36 | s_Bacteroides_finegoldii       |
| 37 | s_Bacteroides_fragilis         |
| 38 | s_Bacteroides_intestinalis     |
| 39 | s_Bacteroides_massiliensis     |
| 40 | s_Bacteroides_nordii           |
| 41 | s_Bacteroides_ovatus           |
| 42 | s_Bacteroides_plebeius         |
| 43 | s_Bacteroides_salyersiae       |
| 44 | s_Bacteroides_stercoris        |
| 45 | s_Bacteroides_thetaiotaomicron |
| 46 | s_Bacteroides_uniformis        |
| 47 | s_Bacteroides_vulgatus         |
| 48 | s_Bacteroides_xylanisolvens    |
| 49 | s_Barnesiella_intestinihominis |
| 50 | s_Bifidobacterium_adolescentis |
| 51 | s_Bifidobacterium_animalis     |
| 52 | s_Bifidobacterium_bifidum      |
| 53 |                                |
| 54 |                                |
| 55 |                                |
| 56 |                                |
| 57 |                                |
| 58 |                                |
| 59 |                                |
| 60 |                                |



1  
2  
3  
4  
5  
6  
7  
8  
9  
10  
11  
12  
13  
14  
15  
16  
17  
18  
19  
20  
21  
22  
23  
24  
25  
26  
27  
28  
29  
30  
31  
32  
33  
34  
35  
36  
37  
38  
39  
40  
41  
42  
43  
44  
45  
46  
47  
48  
49  
50  
51  
52  
53  
54  
55  
56  
57  
58  
59  
60

|                                        |
|----------------------------------------|
| s_Bifidobacterium_catenulatum          |
| s_Bifidobacterium_longum               |
| s_Bifidobacterium_pseudocatenulatum    |
| s_Bilophila_unclassified               |
| s_Bilophila_wadsworthia                |
| s_Burkholderiales_bacterium_1_1_47     |
| s_Catenibacterium_mitsuokai            |
| s_Clostridium_bartlettii               |
| s_Clostridium_bolteae                  |
| s_Clostridium_leptum                   |
| s_Collinsella_aerofaciens              |
| s_Coprobacter_fastidiosus              |
| s_Coprococcus_catus                    |
| s_Coprococcus_comes                    |
| s_Coprococcus_sp_ART55_1               |
| s_Desulfovibrio_desulfuricans          |
| s_Desulfovibrio_piger                  |
| s_Dorea_formicigenerans                |
| s_Dorea_longicatena                    |
| s_Eggerthella_unclassified             |
| s_Erysipelotrichaceae_bacterium_6_1_45 |
| s_Escherichia_coli                     |
| s_Escherichia_unclassified             |
| s_Eubacterium_biforme                  |
| s_Eubacterium_eligens                  |
| s_Eubacterium_hallii                   |
| s_Eubacterium_ramulus                  |
| s_Eubacterium_rectale                  |
| s_Eubacterium_siraeum                  |
| s_Eubacterium_ventriosum               |
| s_Faecalibacterium_prausnitzii         |
| s_Flavonifractor_plautii               |
| s_Gordonibacter_pamelaeae              |
| s_Haemophilus_parainfluenzae           |
| s_Holdemania_unclassified              |
| s_Lachnospiraceae_bacterium_1_1_57FAA  |
| s_Lachnospiraceae_bacterium_2_1_58FAA  |
| s_Lachnospiraceae_bacterium_3_1_46FAA  |
| s_Lachnospiraceae_bacterium_5_1_63FAA  |
| s_Lachnospiraceae_bacterium_7_1_58FAA  |
| s_Lachnospiraceae_bacterium_8_1_57FAA  |
| s_Lactobacillus_ruminis                |
| s_Lactococcus_lactis                   |
| s_Megamonas_unclassified               |
| s_Methanobrevibacter_smithii           |
| s_Odoribacter_splanchnicus             |
| s_Oscillibacter_unclassified           |
| s_Oxalobacter_formigenes               |
| s_Parabacteroides_distasonis           |
| s_Parabacteroides_goldsteinii          |

|    |                                             |
|----|---------------------------------------------|
| 1  | s_Parabacteroides_johnsonii                 |
| 2  | s_Parabacteroides_merdae                    |
| 3  | s_Parabacteroides_unclassified              |
| 4  | s_Paraprevotella_clara                      |
| 5  | s_Paraprevotella_unclassified               |
| 6  | s_Paraprevotella_xylaniphila                |
| 7  | s_Parasutterella_excrementihominis          |
| 8  | s_Peptostreptococcaceae_noname_unclassified |
| 9  | s_Phascolarctobacterium_succinatutens       |
| 10 | s_Prevotella_copri                          |
| 11 | s_Roseburia_hominis                         |
| 12 | s_Roseburia_intestinalis                    |
| 13 | s_Roseburia_inulinivorans                   |
| 14 | s_Roseburia_unclassified                    |
| 15 | s_Ruminococcus_albus                        |
| 16 | s_Ruminococcus_bromii                       |
| 17 | s_Ruminococcus_callidus                     |
| 18 | s_Ruminococcus_gnavus                       |
| 19 | s_Ruminococcus_lactaris                     |
| 20 | s_Ruminococcus_obeum                        |
| 21 | s_Ruminococcus_sp_5_1_39BFAA                |
| 22 | s_Ruminococcus_torques                      |
| 23 | s_Streptococcus_parasanguinis               |
| 24 | s_Streptococcus_salivarius                  |
| 25 | s_Streptococcus_thermophilus                |
| 26 | s_Subdoligranulum_unclassified              |
| 27 | s_Sutterella_wadsworthensis                 |
| 28 | s_Veillonella_parvula                       |
| 29 |                                             |
| 30 |                                             |
| 31 |                                             |
| 32 |                                             |
| 33 |                                             |
| 34 |                                             |
| 35 |                                             |
| 36 |                                             |
| 37 |                                             |
| 38 |                                             |
| 39 |                                             |
| 40 |                                             |
| 41 |                                             |
| 42 |                                             |
| 43 |                                             |
| 44 |                                             |
| 45 |                                             |
| 46 |                                             |
| 47 |                                             |
| 48 |                                             |
| 49 |                                             |
| 50 |                                             |
| 51 |                                             |
| 52 |                                             |
| 53 |                                             |
| 54 |                                             |
| 55 |                                             |
| 56 |                                             |
| 57 |                                             |
| 58 |                                             |
| 59 |                                             |
| 60 |                                             |
