# Supplementary material for: BREAst Cancer Personalised NuTrition (BREACPNT): dietary intervention in breast cancer survivors treated with endocrine therapy – a protocol for a randomised clinical trial
Source: PubMed Central journal article supplement — BMJ Open. 2022 Nov 21;12(11):e062498. doi: 10.1136/bmjopen-2022-062498 (PMC9680181; doi:10.1136/bmjopen-2022-062498), 2022-11-21
Supplement: bmjopen-2022-062498supp003.pdf [file bmjopen-2022-062498supp003.pdf]

| <b>Supplementary Table1: Features for Prediction</b> |
|------------------------------------------------------|
| List of features - PPGR predictions                  |
| <b>Blood tests</b>                                   |
| HbA1C%                                               |
| Hemoglobin                                           |
| FastingGlucose                                       |
| <b>Anthropometric (measured at profiling)</b>        |
| BMI                                                  |
| BodyFat                                              |
| Waist                                                |
| Weight                                               |
| Hips                                                 |
| <b>Dietary components of the meal</b>                |
| Alanine_g                                            |
| Alcohol_g                                            |
| Arginine_g                                           |
| Caffeine_mg                                          |
| Calcium_mg                                           |
| Carbohydrate_g                                       |
| Cholesterol_mg                                       |
| Energy_kcal                                          |
| Fructose_g                                           |
| Galactose_g                                          |
| Glucose_g                                            |
| Isoleucine_g                                         |
| Lactose_g                                            |
| Leucine_g                                            |
| Magnesium_mg                                         |
| Maltose_g                                            |
| Niacin_mg                                            |
| Phenylalanine_g                                      |
| Protein_g                                            |
| Sodium_mg                                            |
| Starch_g                                             |
| Sucrose_g                                            |
| SugarsTotal_g                                        |
| Thiamin_mg                                           |
| TotalDietaryFiber_g                                  |
| TotalLipid_g                                         |
| TotalMonounsaturatedFattyAcids_g                     |
| TotalPolyunsaturatedFattyAcids_g                     |
| TotalSaturatedFattyAcids_g                           |
| TotalTransFattyAcids_g                               |
| VitaminC_mg                                          |
| VitaminD_IU                                          |
| VitaminE_mg                                          |
| Water_g                                              |
| Zinc_mg                                              |
| <b>Health questionnaire</b>                          |
| Age                                                  |

|                                |
|--------------------------------|
| Currently_smokes               |
| Evening_Hunger                 |
| Ever_smoked                    |
| Gender                         |
| General_Hunger                 |
| Is_pregnant                    |
| Midday_Hunger                  |
| Morning_Hunger                 |
| Physical_activity_-_freq       |
| Physical_activity_-_mins       |
| Regular_defecation             |
| Sleep_quality                  |
| Stress                         |
| Work_activity                  |
| <b>Microbiome features</b>     |
| s_Acidaminococcus_unclassified |
| s_Adlercreutzia_equolifaciens  |
| s_Akkermansia_muciniphila      |
| s_Alistipes_finegoldii         |
| s_Alistipes_indistinctus       |
| s_Alistipes_nderdonkii         |
| s_Alistipes_putredinis         |
| s_Alistipes_senegalensis       |
| s_Alistipes_shahii             |
| s_Anaerostipes_hadrus          |
| s_Anaerotruncus_unclassified   |
| s_Bacteroidales_bacterium_ph8  |
| s_Bacteroides_caccae           |
| s_Bacteroides_cellulosilyticus |
| s_Bacteroides_clarus           |
| s_Bacteroides_dorei            |
| s_Bacteroides_eggerthii        |
| s_Bacteroides_faecis           |
| s_Bacteroides_finegoldii       |
| s_Bacteroides_fragilis         |
| s_Bacteroides_intestinalis     |
| s_Bacteroides_massiliensis     |
| s_Bacteroides_nordii           |
| s_Bacteroides_ovatus           |
| s_Bacteroides_plebeius         |
| s_Bacteroides_salyersiae       |
| s_Bacteroides_stercoris        |
| s_Bacteroides_thetaiotaomicron |
| s_Bacteroides_uniformis        |
| s_Bacteroides_vulgatus         |
| s_Bacteroides_xylanisolvans    |
| s_Barnesiella_intestinihominis |
| s_Bifidobacterium_adolescentis |
| s_Bifidobacterium_animalis     |
| s_Bifidobacterium_bifidum      |

|                                        |
|----------------------------------------|
| s_Bifidobacterium_catenuatum           |
| s_Bifidobacterium_longum               |
| s_Bifidobacterium_pseudocatenulatum    |
| s_Bilophila_unclassified               |
| s_Bilophila_wadsworthia                |
| s_Burkholderiales_bacterium_1_1_47     |
| s_Catenibacterium_mitsuokai            |
| s_Clostridium_bartlettii               |
| s_Clostridium_bolteae                  |
| s_Clostridium_leptum                   |
| s_Collinsella_aerofaciens              |
| s_Coprobacter_fastidiosus              |
| s_Coprococcus_catus                    |
| s_Coprococcus_comes                    |
| s_Coprococcus_sp_ART55_1               |
| s_Desulfovibrio_desulfuricans          |
| s_Desulfovibrio_piger                  |
| s_Dorea_formicigenerans                |
| s_Dorea_longicatena                    |
| s_Eggerthella_unclassified             |
| s_Erysipelotrichaceae_bacterium_6_1_45 |
| s_Escherichia_coli                     |
| s_Escherichia_unclassified             |
| s_Eubacterium_biforme                  |
| s_Eubacterium_eligens                  |
| s_Eubacterium_hallii                   |
| s_Eubacterium_ramulus                  |
| s_Eubacterium_rectale                  |
| s_Eubacterium_siraeum                  |
| s_Eubacterium_ventriosum               |
| s_Faecalibacterium_prausnitzii         |
| s_Flavonifractor_plautii               |
| s_Gordonibacter_pamelaeeae             |
| s_Haemophilus_parainfluenzae           |
| s_Holdemania_unclassified              |
| s_Lachnospiraceae_bacterium_1_1_57FAA  |
| s_Lachnospiraceae_bacterium_2_1_58FAA  |
| s_Lachnospiraceae_bacterium_3_1_46FAA  |
| s_Lachnospiraceae_bacterium_5_1_63FAA  |
| s_Lachnospiraceae_bacterium_7_1_58FAA  |
| s_Lachnospiraceae_bacterium_8_1_57FAA  |
| s_Lactobacillus_ruminis                |
| s_Lactococcus_lactis                   |
| s_Megamonas_unclassified               |
| s_Methanobrevibacter_smithii           |
| s_Odoribacter_splanchnicus             |
| s_Oscillibacter_unclassified           |
| s_Oxalobacter_formigenes               |
| s_Parabacteroides_distasonis           |
| s_Parabacteroides_goldsteinii          |

|                                             |
|---------------------------------------------|
| s_Parabacteroides_johnsonii                 |
| s_Parabacteroides_merdae                    |
| s_Parabacteroides_unclassified              |
| s_Paraprevotella_clara                      |
| s_Paraprevotella_unclassified               |
| s_Paraprevotella_xylaniphila                |
| s_Parasutterella_excrementihominis          |
| s_Peptostreptococcaceae_noname_unclassified |
| s_Phascolarctobacterium_succinatutens       |
| s_Prevotella_copri                          |
| s_Roseburia_hominis                         |
| s_Roseburia_intestinalis                    |
| s_Roseburia_inulinivorans                   |
| s_Roseburia_unclassified                    |
| s_Ruminococcus_albus                        |
| s_Ruminococcus_bromii                       |
| s_Ruminococcus_callidus                     |
| s_Ruminococcus_gnavus                       |
| s_Ruminococcus_lactaris                     |
| s_Ruminococcus_obeum                        |
| s_Ruminococcus_sp_5_1_39BFAA                |
| s_Ruminococcus_torques                      |
| s_Streptococcus_parasanguinis               |
| s_Streptococcus_salivarius                  |
| s_Streptococcus_thermophilus                |
| s_Subdoligranulum_unclassified              |
| s_Sutterella_wadsworthensis                 |
| s_Veillonella_parvula                       |
